# Supplementary material for: Click-alkynylation of N- and P-nucleophiles by oxidative cross-coupling with alkynylcopper reagents: a general synthesis of ynamides and alkynylphosphonates
Source: Royal Society of Chemistry journal article supplement (doi:10.1039/c2sc00842d), 2011-12-03
Supplement: c2sc00842d.pdf [file c2sc00842d.pdf]

*Supporting Information*

**Click-Alkynylation of N- and P- Nucleophiles by Oxidative  
Cross-Coupling with Alkynylcopper Reagents:  
A General Synthesis of Ynamides and Alkynylphosphonates**

Kévin Jouvin, Jérémy Heimbürger and Gwilherm Evano\*

*Institut Lavoisier de Versailles, UMR CNRS 8180  
Université de Versailles Saint-Quentin en Yvelines  
45, avenue des Etats-Unis  
78035 Versailles Cedex  
France*

|                                                                                                      |    |
|------------------------------------------------------------------------------------------------------|----|
| General Information.....                                                                             | 1  |
| Experimental Procedures and Characterization Data:<br>for Unreported Starting materials .....        | 2  |
| Experimental Procedures and Characterization Data:<br>for Alkynylcopper Reagents .....               | 5  |
| Experimental Procedures and Characterization Data:<br>Ynamides from Alkynylcopper Reagents .....     | 10 |
| Experimental Procedures and Characterization Data:<br>Complex Ynamides and Alkynylphosphonates ..... | 28 |
| <sup>1</sup> H and <sup>13</sup> C NMR spectra.....                                                  | 33 |

## General Information

All solvents were reagent grade. Dimethylformamide, acetonitrile and *N,N,N',N'*-tetramethylethylenediamine were freshly distilled from calcium hydride. THF and toluene were freshly distilled from sodium/benzophenone under argon. All other reagents were used as supplied.

Reactions were magnetically stirred. Flash chromatography was performed with silica gel 60 (particle size 35-70  $\mu\text{m}$ ) supplied by SDS. Yields refer to chromatographically and spectroscopically pure compounds.

Proton NMR spectra were recorded using an internal deuterium lock at ambient temperature on a Bruker 300 MHz spectrometer. Internal references of  $\delta_{\text{H}}$  7.26 was used for  $\text{CDCl}_3$ . Data are presented as follows: chemical shift (in ppm on the  $\delta$  scale relative to  $\delta_{\text{TMS}} = 0$ ), multiplicity (s = singlet, d = doublet, t = triplet, q = quartet, quint. = quintuplet, hept. = heptuplet, m = multiplet, br. = broad, app. = apparent), coupling constant ( $J/\text{Hz}$ ) and integration. Resonances that are either partially or fully obscured are denoted obscured (obs.). Carbon-13 NMR spectra were recorded at 75 MHz. Internal references of  $\delta_{\text{C}}$  77.16 was used for  $\text{CDCl}_3$ . Phosphorus-31 NMR spectra were recorded at 121 MHz.

Optical rotations were recorded on a Perkin Elmer 341 polarimeter at 365 or 589 nm and reported as follows:  $[\alpha]_{365}^{20}$  or  $[\alpha]_{\text{D}}^{20}$ , concentration ( $c$  in g/100 mL), and solvent. Melting points were recorded on a Buchi B-545. Infrared spectra were recorded on a Nicolet iS 10 (SMART iTR diamond ATR) spectrophotometer. High-resolution mass-spectra were obtained on a Waters Xevo Qtof spectrometer. Elemental analyses were obtained by combustion analysis (for C,H,N) and by inductively coupled plasma atomic emission spectroscopy (for Cu).

## Experimental Procedures and Characterization Data for Unreported Starting materials

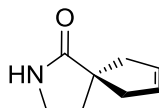

**2-Azaspiro[4.4]non-7-en-1-one.** A 100 mL round bottom flask was charged with 3,3-diallylpyrrolidin-2-one (800 mg, 4.8 mmol). The flask was fitted with a condenser, evacuated under high vacuum and backfilled with argon. Dry and degassed toluene (50 mL) and benzyldiene[1,3-bis(2,4,6-trimethylphenyl)-2-imidazolidinylidene]dichloro-(tricyclohexylphosphine)ruthenium (Grubbs' second generation catalyst, 75 mg, 0.09 mmol) were successively added and the resulting purple reaction mixture was refluxed overnight. The reaction mixture was cooled to rt, concentrated and directly purified by flash chromatography over silica gel (EtOAc) to give the desired spirocyclic lactam (660 mg, 4.8 mmol, quant.) as a greyish solid. Mp: 133 °C; <sup>1</sup>H NMR (300 MHz, CDCl<sub>3</sub>): δ 7.08 (br. s, 1H), 5.64 (s, 2H), 3.31 (t, *J* = 6.7 Hz, 2H), 2.80 (d, *J* = 14.6 Hz, 2H), 2.29 (d, *J* = 14.5 Hz, 2H), 2.08 (t, *J* = 6.6 Hz, 2H); <sup>13</sup>C NMR (75 MHz, CDCl<sub>3</sub>): δ 183.5, 128.6, 49.0, 43.3, 39.6, 38.0; IR (ATR) ν<sub>max</sub> 3180, 3057, 2907, 2166, 2016, 1677, 1436, 1369, 1294, 1223, 801, 671, 632 cm<sup>-1</sup>; ESIMS (positive mode): 138.1; ESIHRMS *m/z* calcd for C<sub>8</sub>H<sub>12</sub>NO [M+H]<sup>+</sup> 138.0919, found 138.0918.

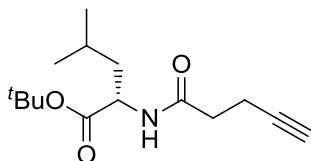

**(*S*)-5-[(1-*tert*-Butoxy-4-methyl-1-oxopentan-2-yl)amino]-5-oxopent-1-yne.** To a solution of (*S*)-leucine *tert*-butyl ester hydrochloride (2.4 g, 10.5 mmol) and pent-4-ynoic acid (981 mg, 10.0 mmol) in DMF (30 mL) was added 1-hydroxybenzotriazole (HOBt, 1.5 g, 11.1 mmol). 1-(3-Dimethylaminopropyl)-3-ethyl-carbodiimide hydrochloride (EDC, 1.9 g, 10.0 mmol) and *N*-methyl-morpholine (1.4 mL, 12.7 mmol) were next added at 0 °C and the solution was stirred for 16 hours while progressively warmed to rt. The yellow reaction mixture was quenched with

water and diluted with ethyl acetate. The aqueous layer was extracted with ethyl acetate and the combined organic layers were successively washed with a 1M HCl aqueous solution, 1M NaOH aqueous solution and brine, dried over MgSO<sub>4</sub>, filtered and concentrated to give the desired leucine derivative (2.6 g, 9.8 mmol, 99%) as a pale yellow oil which can be used in the next step without further purification.  $[\alpha]_{365}^{20} +16$  (*c* 1.5, CHCl<sub>3</sub>); <sup>1</sup>H NMR (300 MHz, CDCl<sub>3</sub>):  $\delta$  6.52 (br. d, *J* = 8.3 Hz, 1H), 4.45 (dt, *J* = 8.7 and 5.4 Hz, 1H), 2.46-2.30 (m, 4H), 1.89 (t, *J* = 2.3 Hz, 1H), 1.66-1.39 (m, 3H), 1.36 (s, 9H), 0.83 (d, *J* = 6.3 Hz, 6H); <sup>13</sup>C NMR (75 MHz, CDCl<sub>3</sub>):  $\delta$  172.6, 170.6, 82.9, 81.8, 69.2, 51.2, 41.8, 35.0, 27.9, 24.8, 22.7, 22.0, 14.7; IR (ATR)  $\nu_{\max}$  3306, 2955, 2128, 1740, 1645, 1547, 1369, 1247, 1140, 845, 746, 632 cm<sup>-1</sup>; ESIMS (positive mode): 290.2, 234.1, 212.1, 166.1, 132.1; ESIHRMS *m/z* calcd for C<sub>15</sub>H<sub>25</sub>NO<sub>3</sub>Na [M+Na]<sup>+</sup> 290.1732, found 290.1742.

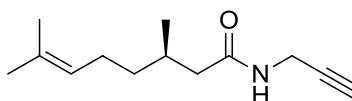

**(*R*)-3-(3,7-Dimethyloct-6-enamido)prop-1-yne.** To a solution of (*R*)-citronellic acid (1.0 g, 5.9 mmol) in THF (15 mL) were successively added *N*-methylmorpholine (770  $\mu$ L, 7.0 mmol) and, after 5 minutes, isobutylchloroformate (775  $\mu$ L, 7.0 mmol) at -78 °C. The resulting white slurry was stirred at -78 °C for 5 minutes and propargylamine (970  $\mu$ L, 14.1 mmol) was slowly added. The reaction mixture was then warmed to rt over 1 hour and quenched by addition of a 1M HCl aqueous solution. The aqueous layer was extracted with ethyl acetate, combined organic layers were successively washed with 1M NaOH and brine, dried over MgSO<sub>4</sub>, filtered and concentrated. The crude residue was purified by flash chromatography over silica gel (EtOAc/petroleum ether: 2/8) to give the desired amide (954 mg, 4.6 mmol, 78%) as a white solid. Mp: 57 °C;  $[\alpha]_{\text{D}}^{20}$  0 (*c* 0.5, CHCl<sub>3</sub>); <sup>1</sup>H NMR (300 MHz, CDCl<sub>3</sub>):  $\delta$  6.03 (br. s, 1H), 5.05 (t, *J* = 7.1 Hz, 1H), 4.02 (dd, *J* = 5.3 and 2.5 Hz, 2H), 2.25-2.16 (m, 2H), 2.02-1.91 (m, 4H), 1.65 (s, 3H), 1.57 (s, 3H), 1.38-1.28 (m, 1H), 1.23-1.13 (m, 1H), 0.91 (d, *J* = 6.2 Hz, 3H); <sup>13</sup>C NMR (75 MHz, CDCl<sub>3</sub>):  $\delta$  172.5, 131.6, 124.4, 79.8, 71.5, 44.2, 37.0, 30.5, 29.1, 25.8, 25.5, 19.6, 17.7; IR (ATR)  $\nu_{\max}$  3290, 2967, 2904, 2182, 2020, 1637, 1535, 1448, 1373, 1262, 1223, 1065, 896,



682, 655, 608  $\text{cm}^{-1}$ ; ESIMS (positive mode): 209.2, 208.2, 153.1; ESIHRMS  $m/z$  calcd for  $\text{C}_{13}\text{H}_{22}\text{NO}$   $[\text{M}+\text{H}]^+$  208.1701, found 208.1703.

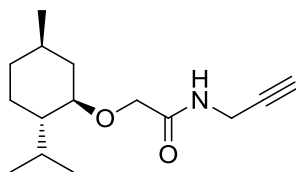

**(1*R*,3*R*,4*S*)-Menthoxyacetic acid propargylamide.** To a solution of (1*R*,3*R*,4*S*)-menthoxyacetic acid (2.1 g, 10.0 mmol) in THF (25 mL) were successively added *N*-methylmorpholine (1.3 mL, 12.0 mmol) and, after 5 minutes, isobutylchloroformate (1.6 mL, 12.0 mmol) at  $-78\text{ }^{\circ}\text{C}$ . The resulting white slurry was stirred at  $-78\text{ }^{\circ}\text{C}$  for 5 minutes and propargylamine (1.6 mL, 24.0 mmol) was slowly added. The reaction mixture was then warmed to rt over 1 hour and quenched by addition of a 1M HCl aqueous solution. The aqueous layer was extracted with ethyl acetate, combined organic layers were successively washed with 1M NaOH and brine, dried over  $\text{MgSO}_4$ , filtered and concentrated. The crude residue was purified by flash chromatography over silica gel (EtOAc/petroleum ether: 1/9) to give the desired amide (1.9 g, 7.6 mmol, 76%) as a colorless oil.  $[\alpha]_{\text{D}}^{20} -83$  ( $c$  1.2,  $\text{CHCl}_3$ );  $^1\text{H}$  NMR (300 MHz,  $\text{CDCl}_3$ ):  $\delta$  6.76 (br. s, 1H), 4.00 (A of AB syst.,  $J = 2.9$  Hz, 1H), 3.98 (B of AB syst.,  $J = 2.9$  Hz, 1H), 3.98 (A' of A'B' syst.,  $J = 15.2$  Hz, 1H), 3.78 (B' of A'B' syst.,  $J = 15.2$  Hz, 1H), 3.05 (td,  $J = 10.6$  and  $4.1$  Hz, 1H), 2.17 (t,  $J = 2.5$  Hz, 1H), 2.03 (hept d,  $J = 7.0$  and  $2.7$  Hz, 1H), 1.98-1.93 (m, 1H), 1.59-1.52 (m, 2H), 1.32-1.15 (m, 2H), 0.96-0.71 (obs. m, 3H), 0.82 (d,  $J = 7.0$  Hz, 6H), 0.68 (d,  $J = 7.0$  Hz, 3H);  $^{13}\text{C}$  NMR (75 MHz,  $\text{CDCl}_3$ ):  $\delta$  170.0, 80.4, 79.3, 71.4, 67.6, 47.9, 40.0, 34.2, 31.3, 28.3, 25.9, 23.1, 22.1, 20.8, 16.1; IR (ATR)  $\nu_{\text{max}}$  3432, 3314, 2955, 2915, 2872, 2135, 1665, 1511, 1448, 1239, 1105, 655  $\text{cm}^{-1}$ ; ESIMS (positive mode): 252.2, 114.1; ESIHRMS  $m/z$  calcd for  $\text{C}_{15}\text{H}_{26}\text{NO}_2$   $[\text{M}+\text{H}]^+$  252.1964, found 252.1961.

## Experimental Procedures and Characterization Data for Alkynylcopper Reagents

### General procedure for the synthesis of alkynylcopper reagents:

- **Method A using copper iodide in aqueous ammonia and ethanol.** To a solution of copper iodide (3.8 g, 20.0 mmol) in a mixture of ammonium hydroxide (28% NH<sub>3</sub> solution, 50 mL) and ethanol (30 mL) was added the alkyne (10.0 mmol) dropwise. The deep blue reaction mixture was stirred overnight at room temperature under argon and the yellow precipitate was collected by filtration and successively washed with ammonium hydroxide (10% NH<sub>3</sub> solution, 3x50 mL), water (3x50 mL), ethanol (3x50 mL), and diethyl ether (3x50 mL). The bright yellow solid was then dried under high vacuum overnight to afford the desired polymeric alkynylcopper reagent which was used without further purification.

- **Method B using copper iodide and potassium carbonate in DMF.** To a suspension of copper iodide (762 mg, 4.0 mmol) in DMF (15 mL) was added a solution of the alkyne (4.0 mmol) in DMF (5 mL) *via* cannula and under argon. Finely powdered potassium carbonate (1.1 g, 8.0 mmol) was then added at rt and the resulting slurry was stirred under argon for 2 hours, slowly turning into a bright yellow and thick suspension of copper acetylide which was then collected by filtration and successively washed with ammonium hydroxide (10% NH<sub>3</sub> solution, 2x10 mL), water (2x10 mL), absolute ethanol (2x10 mL), and diethyl ether (2x10 mL). The bright yellow solid was then dried under high vacuum overnight to afford the desired polymeric alkynylcopper reagent.

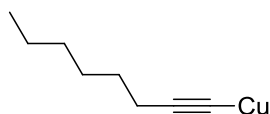

**Oct-1-yn-1-ylcopper.** This compound was obtained according to method A; Yield: 66%. Anal. Calcd for C<sub>8</sub>H<sub>13</sub>Cu: C, 55.63; H, 7.59; Cu, 36.79. Found: C, 55.31; H, 7.29; Cu, 36.69.

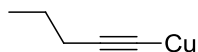

**Pent-1-yn-1-ylcopper.** This compound was obtained according to method A; Yield: 66%. Anal. Calcd for  $C_5H_7Cu$ : C, 45.96; H, 5.40; Cu, 47.94. Found: C, 45.36; H, 5.26; Cu, 48.64.

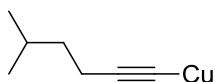

**(5-Methylhex-1-yn-1-yl)copper.** This compound was obtained according to method A; Yield: 64%. Anal. Calcd for  $C_7H_{11}Cu$ : C, 52.97; H, 6.99; Cu, 40.04. Found: C, 52.95; H, 6.73; Cu, 40.08.

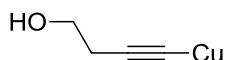

**(4-Hydroxybut-1-yn-1-yl)copper.** This compound was obtained according to method A; Yield: 28%. Anal. Calcd for  $C_4H_5CuO$ : C, 36.22; H, 3.80; Cu, 47.91. Found: C, 35.92; H, 3.62; Cu, 48.15.

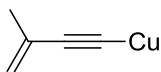

**(3-Methylbut-3-en-1-yn-1-yl)copper.** This compound was obtained according to method A; Yield: 12%. Anal. Calcd for  $C_5H_5Cu$ : C, 46.68; H, 3.92; Cu, 49.40. Found: C, 46.67; H, 3.86; Cu, 48.31.

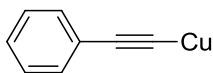

**(Phenylethynyl)copper.** This compound, which is also commercially available, was obtained according to method A; Yield: 59%. Anal. Calcd for  $C_8H_5Cu$ : C, 58.35; H, 3.06; Cu, 38.59. Found: C, 58.02; H, 3.08; Cu, 37.99.

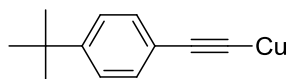

**[(4-*tert*-Butylphenyl)ethynyl]copper.** This compound was obtained according to method A; Yield: 43%. Anal. Calcd for  $C_{12}H_{13}Cu$ : C, 65.28; H, 5.94; Cu, 28.78. Found: C, 64.28; H, 5.84; Cu, 28.01.

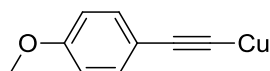

**[(4-Methoxyphenyl)ethynyl]copper.** This compound was obtained according to method A; Yield: 38%. Anal. Calcd for  $C_9H_7CuO$ : C, 55.52; H, 3.62; Cu, 32.64. Found: C, 55.45; H, 3.57; Cu, 31.86.

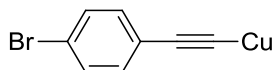

**[(4-Bromophenyl)ethynyl]copper.** This compound was obtained according to method A; Yield: 57%. Anal. Calcd for  $C_8H_4BrCu$ : C, 39.45; H, 1.66; Cu, 26.09. Found: C, 40.34; H, 1.76; Cu, 25.19.

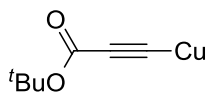

**[(*tert*-Butoxycarbonyl)ethynyl]copper.** This compound was obtained according to method A; Yield: 62%. Anal. Calcd for  $C_7H_9CuO_2$ : C, 44.56; H, 4.81; Cu, 33.68. Found: C, 44.79; H, 4.67; Cu, 33.21.

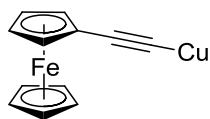

**(Ferrocenylethynyl)copper.** This compound was obtained according to method A; Yield: 97%. Anal. Calcd for  $C_{12}H_9CuFe$ : C, 52.87; H, 3.33; Cu, 23.31. Found: C, 53.02; H, 3.18; Cu, 22.97.

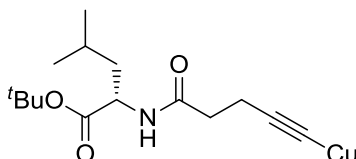

**(S)-{5-[(1-*tert*-Butoxy-4-methyl-1-oxopentan-2-yl)amino]-5-oxopent-1-yn-1-yl}copper.** This compound was obtained according to method B; Yield: 91%. Anal. Calcd for  $C_{15}H_{24}CuNO_3$ : C, 54.61; H, 7.33; Cu, 19.26; N, 4.25. Found: C, 54.82; H, 7.15; Cu, 18.94; N, 3.99.

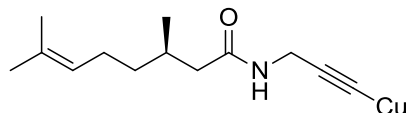

**(R)-[3-(3,7-Dimethyloct-6-enamido)prop-1-yn-1-yl]copper.** This compound was obtained according to method B; Yield: 94%. Anal. Calcd for  $C_{13}H_{20}CuNO$ : C, 57.86; H, 7.47; Cu, 23.55; N, 5.19. Found: C, 57.76; H, 7.25; Cu, 23.25; N, 5.37.

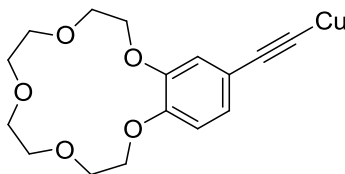

**[(2,3,5,6,8,9,11,12-Octahydrobenzo[*b*][1,4,7,10,13]pentaoxacyclopentadecin-15-yl)ethynyl]copper.** This compound has been previously reported.<sup>S1</sup>

<sup>S1</sup> Vasilevsky, S. F.; Krivenko, O. L.; Gorelik, V. R.; Alabugin, I. V. *Tetrahedron* **2008**, 64, 8807.

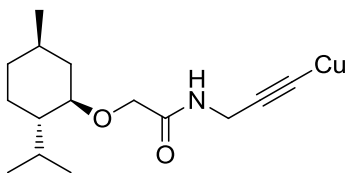

**(1R,3R,4S)-[(Menthoxyacetamido)prop-1-yn-1-yl]copper.** This compound was obtained according to method B; Yield: 76%. Anal. Calcd for  $C_{15}H_{24}CuNO_2$ : C, 57.39; H, 7.71; Cu, 20.24; N, 4.46. Found: C, 57.33; H, 7.63; Cu, 20.01; N, 4.51.

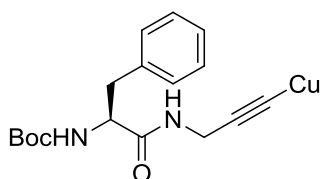

**(S)-{3-[2-(tert-Butoxycarbonylamino)-3-phenylpropanamido]-prop-1-yn-1-yl}copper.** This compound was obtained according to method B; Yield: 86%. Anal. Calcd for  $C_{17}H_{21}CuN_2O_3$ : C, 55.95; H, 5.80; Cu, 17.41; N, 7.68. Found: C, 56.08; H, 6.02; Cu, 16.99; N, 7.75.

## Experimental Procedures and Characterization Data:

### Ynamides from Alkynylcopper Reagents

#### General procedure for the synthesis of ynamides from alkynylcopper reagents.

A 5 mL round bottom flask was successively charged with the nitrogen nucleophile (8.0 mmol), the alkynylcopper reagent (2.0 mmol) and acetonitrile (4 mL). The resulting bright yellow slurry was then treated with *N,N,N',N'*-tetramethylethylenediamine (300  $\mu$ L, 2.0 mmol) and the reaction mixture was vigorously stirred at room temperature and under an atmosphere of oxygen (balloon). After complete disappearance of the alkynylcopper reagent (complete dissolution to a deep blue homogeneous reaction mixture: typically 24-48h), the crude reaction mixture was concentrated under vacuum and the residue was finally purified by flash chromatography over silica gel to afford the desired ynamide.

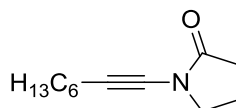

**7a**

**1-(Oct-1-yn-1-yl)pyrrolidin-2-one 7a.** This compound has been previously reported.<sup>S2</sup> Yield: 93% (92% on a 1.9 g scale).

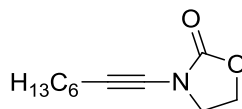

**7b**

**3-(Oct-1-yn-1-yl)oxazolidin-2-one 7b.** This compound has been previously reported.<sup>S3</sup> Yield: 86% (91% on a 2.0 g scale).

<sup>S2</sup> Wei, L-L; Mulder, J. A.; Xiong, H.; Zifcsak, C. A.; Douglas, C. J.; Hsung, R. P. *Tetrahedron* **2001**, 57, 459.

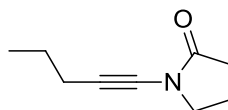

**10a**

**1-(Pent-1-yn-1-yl)pyrrolidin-2-one 10a.** Yield: 84% (82% on a 12.4 g scale). Pale yellow oil;  $^1\text{H}$  NMR (300 MHz,  $\text{CDCl}_3$ ):  $\delta$  3.60 (t,  $J = 7.5$  Hz, 2H), 2.36 (t,  $J = 8.1$  Hz, 2H), 2.25 (t,  $J = 7.2$  Hz, 2H), 1.54-1.43 (m, 2H), 1.53-1.46 (m, 2H), 0.92 (t,  $J = 7.2$  Hz, 3H);  $^{13}\text{C}$  NMR (75 MHz,  $\text{CDCl}_3$ ):  $\delta$  176.1, 72.4, 71.5, 50.1, 29.6, 22.3, 20.5, 18.6, 13.4; IR (ATR)  $\nu_{\text{max}}$  2963, 2261, 1716, 1390, 1298, 1211, 1089, 639  $\text{cm}^{-1}$ ; ESIMS (positive mode): 152.1, 124.1; ESIHRMS  $m/z$  calcd for  $\text{C}_9\text{H}_{14}\text{NO}$   $[\text{M}+\text{H}]^+$  152.1076, found 152.1075.

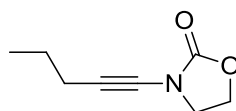

**10b**

**3-(Pent-1-yn-1-yl)oxazolidin-2-one 10b.** Yield: 71%. Yellow oil;  $^1\text{H}$  NMR (300 MHz,  $\text{CDCl}_3$ ):  $\delta$  4.37 (t,  $J = 8.0$  Hz, 2H), 3.83 (t,  $J = 7.0$  Hz, 2H), 2.21 (t,  $J = 7.1$  Hz, 2H), 1.48 (tq,  $J = 7.3$  and 7.2 Hz, 2H), 0.92 (t,  $J = 7.3$  Hz, 3H);  $^{13}\text{C}$  NMR (75 MHz,  $\text{CDCl}_3$ ):  $\delta$  156.7, 70.7, 70.2, 63.0, 47.0, 22.1, 20.2, 13.4; IR (ATR)  $\nu_{\text{max}}$  2963, 2257, 1756, 1409, 1215, 1117, 1034  $\text{cm}^{-1}$ ; ESIMS (positive mode): 154.1, 140.0, 129.0, 114.0, 110.1; ESIHRMS  $m/z$  calcd for  $\text{C}_8\text{H}_{12}\text{NO}_2$   $[\text{M}+\text{H}]^+$  154.0868, found 154.0863.

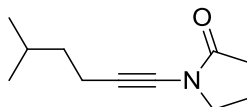

**11a**

**1-(5-Methylhex-1-yn-1-yl)pyrrolidin-2-one 11a.** Yield: 70%. Yellow oil;  $^1\text{H}$  NMR (300 MHz,  $\text{CDCl}_3$ ):  $\delta$  3.57 (t,  $J = 7.0$  Hz, 2H), 2.33 (t,  $J = 9.0$  Hz, 2H), 2.25 (t,  $J = 8.0$  Hz, 2H), 2.06-1.95

<sup>S3</sup> Jouvin, K.; Couty, F.; Evano, G. *Org. Lett.* **2010**, *12*, 3272.



(m, 2H), 1.66-1.55 (m, 1H), 1.40-1.27 (m, 2H), 0.80 (d,  $J = 6.6$  Hz, 6H);  $^{13}\text{C}$  NMR (75 MHz,  $\text{CDCl}_3$ ):  $\delta$  176.6, 73.1, 71.7, 50.6, 38.3, 30.0, 27.7, 22.6, 19.1, 17.0; IR (ATR)  $\nu_{\text{max}}$  2963, 2252, 1716, 1460, 1393, 1290, 1215, 1081  $\text{cm}^{-1}$ ; ESIMS (positive mode): 180.1, 149.0, 125.1, 124.1; ESIHRMS  $m/z$  calcd for  $\text{C}_{11}\text{H}_{18}\text{NO}$   $[\text{M}+\text{H}]^+$  180.1386, found 180.1388.

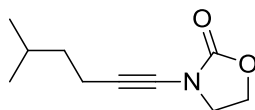

**11b**

**3-(5-Methylhex-1-yn-1-yl)oxazolidin-2-one 11b.** Yield: 50%. Colorless oil;  $^1\text{H}$  NMR (300 MHz,  $\text{CDCl}_3$ ):  $\delta$  4.37 (t,  $J = 7.9$  Hz, 2H), 3.81 (t,  $J = 8.2$  Hz, 2H), 2.24 (t,  $J = 7.4$  Hz, 2H), 1.66-1.55 (app. sept.,  $J = 6.7$  Hz, 1H), 1.40-1.32 (dt,  $J = 7.4$  and  $7.1$  Hz, 2H), 0.82 (d,  $J = 7.5$  Hz, 6H);  $^{13}\text{C}$  NMR (75 MHz,  $\text{CDCl}_3$ ):  $\delta$  156.7, 71.1, 70.0, 62.9, 47.0, 37.7, 27.1, 22.1, 16.3; IR (ATR)  $\nu_{\text{max}}$  2957, 2923, 2864, 2272, 1760, 1480, 1412, 1203, 1105, 1030, 750  $\text{cm}^{-1}$ ; ESIMS (positive mode): 182.1, 129.0, 126.1; ESIHRMS  $m/z$  calcd for  $\text{C}_{10}\text{H}_{16}\text{NO}_2$   $[\text{M}+\text{H}]^+$  182.1181, found 182.1176.

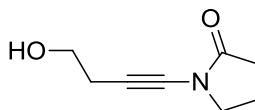

**12a**

**1-(4-Hydroxybut-1-yn-1-yl)pyrrolidin-2-one 12a.** Yield: 68%. Yellow solid; Mp: 58 °C;  $^1\text{H}$  NMR (300 MHz,  $\text{CDCl}_3$ ):  $\delta$  3.66 (t,  $J = 6.4$  Hz, 2H), 3.60 (t,  $J = 7.1$  Hz, 2H), 3.53 (br. s, 1H), 2.52 (t,  $J = 6.9$  Hz, 2H), 2.36 (t,  $J = 7.2$  Hz, 2H), 2.05 (tt,  $J = 7.5$  and  $7.5$  Hz, 2H);  $^{13}\text{C}$  NMR (75 MHz,  $\text{CDCl}_3$ ):  $\delta$  176.9, 72.7, 70.0, 61.1, 50.1, 29.8, 23.1, 18.8; IR (ATR)  $\nu_{\text{max}}$  3428, 2963, 2896, 2257, 1700, 1397, 1219, 1046  $\text{cm}^{-1}$ ; ESIMS (positive mode): 154.1, 149.0; ESIHRMS  $m/z$  calcd for  $\text{C}_8\text{H}_{12}\text{NO}_2$   $[\text{M}+\text{H}]^+$  154.0865, found 154.0868.

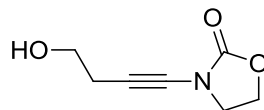

**12b**

**3-(4-Hydroxybut-1-yn-1-yl)oxazolidin-2-one 12b.** Yield: 57%. Pale orange oil;  $^1\text{H}$  NMR (300 MHz,  $\text{CDCl}_3$ ):  $\delta$  4.31 (t,  $J = 6.6$  Hz, 2H), 3.79 (t,  $J = 7.8$  Hz, 2H), 3.69 (br. s, 1H), 3.57 (t,  $J = 6.6$  Hz, 2H), 2.42 (t,  $J = 6.3$  Hz, 2H);  $^{13}\text{C}$  NMR (75 MHz,  $\text{CDCl}_3$ ):  $\delta$  157.0, 71.0, 68.1, 63.2, 60.6, 46.7, 22.4; IR (ATR)  $\nu_{\text{max}}$  3412, 2959, 2904, 2268, 1744, 1416, 1203, 1034  $\text{cm}^{-1}$ ; ESIMS (positive mode): 178.0, 173.0, 149.0; ESIHRMS  $m/z$  calcd for  $\text{C}_7\text{H}_{10}\text{NO}_3$   $[\text{M}+\text{H}]^+$  178.0480, found 178.0485.

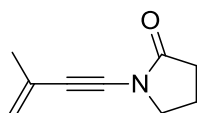

**13a**

**1-(3-Methylbut-3-en-1-yn-1-yl)pyrrolidin-2-one 13a.** Yield: 38%. Orange oil;  $^1\text{H}$  NMR (300 MHz,  $\text{CDCl}_3$ ):  $\delta$  5.21 (br. s, 1H), 5.13 (br. s, 1H), 3.64 (t,  $J = 10.5$  Hz, 2H), 2.40 (t,  $J = 8.0$  Hz, 2H), 2.10 (tt,  $J = 7.5$  and 7.5 Hz, 2H), 1.87 (s, 3H);  $^{13}\text{C}$  NMR (75 MHz,  $\text{CDCl}_3$ ):  $\delta$  176.2, 126.5, 120.8, 80.1, 74.3, 50.6, 30.1, 24.1, 19.2; IR (ATR)  $\nu_{\text{max}}$  2959, 2927, 2249, 1767, 1677, 1412, 1191, 1065, 730, 639  $\text{cm}^{-1}$ ; ESIMS (positive mode): 150.1; ESIHRMS  $m/z$  calcd for  $\text{C}_9\text{H}_{12}\text{NO}$   $[\text{M}+\text{H}]^+$  150.0920, found 150.0919.

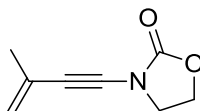

**13b**

**3-(3-Methylbut-3-en-1-yn-1-yl)oxazolidin-2-one 13b.** Yield: 43%. Sticky colorless oil;  $^1\text{H}$  NMR (300 MHz,  $\text{CDCl}_3$ ):  $\delta$  5.20 (br. s, 1H), 5.14 (br. s, 1H), 4.40 (t,  $J = 9.0$  Hz, 2H), 3.89 (t,  $J = 8.1$  Hz, 2H), 1.85 (s, 3H);  $^{13}\text{C}$  NMR (75 MHz,  $\text{CDCl}_3$ ):  $\delta$  156.2, 125.8, 121.2, 78.5, 72.5, 63.3,

47.2, 23.6; IR (ATR)  $\nu_{\text{max}}$  2982, 2237, 1755, 1428, 1231, 1109, 1030  $\text{cm}^{-1}$ ; ESIMS (positive mode): 152.1, 151.1, 150.8, 148.5, 147.2; ESIHRMS  $m/z$  calcd for  $\text{C}_8\text{H}_{10}\text{NO}_2$   $[\text{M}+\text{H}]^+$  152.0712, found 152.0702.

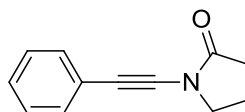

**14a**

**1-(Phenylethynyl)pyrrolidin-2-one 14a.** This compound has been previously reported.<sup>S4</sup> Yield: 76%.

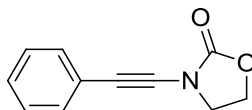

**14b**

**3-(Phenylethynyl)oxazolidin-2-one 14b.** This compound has been previously reported<sup>S4</sup> Yield: 58% (60% on a 2.2 g scale).

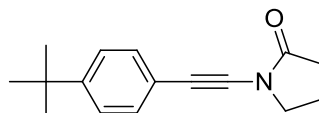

**15a**

**1-[(4-tert-Butylphenyl)ethynyl]pyrrolidin-2-one 15a.** Yield: 50%. Sticky colorless oil;  $^1\text{H}$  NMR (300 MHz,  $\text{CDCl}_3$ ):  $\delta$  7.39 (d,  $J$  = 8.4 Hz, 2H), 7.32 (d,  $J$  = 8.7 Hz, 2H), 3.78 (t,  $J$  = 7.2 Hz, 2H), 2.49 (t,  $J$  = 8.1 Hz, 2H), 2.17 (tt,  $J$  = 7.7 Hz, 2H), 1.31 (s, 9H);  $^{13}\text{C}$  NMR (75 MHz,  $\text{CDCl}_3$ ):  $\delta$  176.4, 151.8, 132.4, 125.9, 120.1, 80.4, 73.3, 50.9, 35.4, 31.8, 30.4, 18.9; IR (ATR)

<sup>S4</sup> Jouvin, K.; Couty, F.; Evano, G. *Org. Lett.* **2010**, *12*, 3272.

$\nu_{\max}$  3677, 2947, 2896, 2241, 1712, 1401, 1231, 1069  $\text{cm}^{-1}$ ; ESIMS (positive mode): 242.2, 241.1, 226.1, 140.0; ESIHRMS  $m/z$  calcd for  $\text{C}_{16}\text{H}_{20}\text{NO}$   $[\text{M}+\text{H}]^+$  242.1548, found 242.1545.

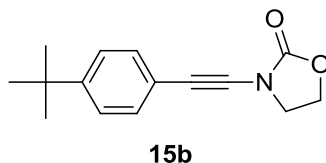

**3-[(4-*tert*-Butylphenyl)ethynyl]oxazolidin-2-one 15b.** This compound has been previously reported.<sup>S5</sup> Yield: 37%.

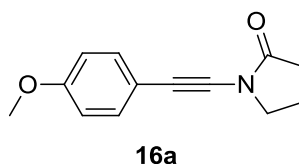

**1-[(4-Methoxyphenyl)ethynyl]pyrrolidin-2-one 16a.** This compound has been previously reported.<sup>S6</sup> Yield: 96%.

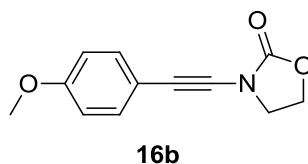

**3-[(4-Methoxyphenyl)ethynyl]oxazolidin-2-one 16b.** This compound has been previously reported.<sup>S7</sup> Yield: 80%.

<sup>S5</sup> Dooleweerd, K.; Birkedal, H.; Skrydstrup, T.; Ruhland, T. *J. Org. Chem.* **2008**, 73, 9447.

<sup>S6</sup> Coste, A.; Karthikeyan, G.; Couty, F.; Evano, G. *Angew. Chem. Int. Ed.* **2009**, 48, 4381.

<sup>S7</sup> Hamada, T.; Ye, X.; Stahl, S. S. *J. Am. Chem. Soc.* **2008**, 130, 833.

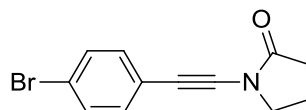

**17a**

**1-[(4-Bromophenyl)ethynyl]pyrrolidin-2-one 17a.** Yield: 61%. White solid; Mp: 88 °C;  $^1\text{H}$  NMR (300 MHz,  $\text{CDCl}_3$ ):  $\delta$  7.38 (d,  $J$  = 10.2 Hz, 2H), 7.25 (d,  $J$  = 9.0 Hz, 2H), 3.72 (t,  $J$  = 7.2 Hz, 2H), 2.43 (t,  $J$  = 8.4 Hz, 2H), 2.18-2.07 (m, 2H);  $^{13}\text{C}$  NMR (75 MHz,  $\text{CDCl}_3$ ):  $\delta$  176.1, 133.2, 131.8, 122.3, 121.9, 81.8, 72.0, 50.3, 30.0, 19.2; IR (ATR)  $\nu_{\text{max}}$  2986, 2900, 2237, 1720, 1400, 1207, 1144, 1073  $\text{cm}^{-1}$ ; ESIMS (positive mode): 266.0, 263.0, 187.0, 173.0, 149.0, 129.0, 111.0; ESIHRMS  $m/z$  calcd for  $\text{C}_{12}\text{H}_{11}\text{BrNO}$   $[\text{M}+\text{H}]^+$  264.0029, found 264.0024.

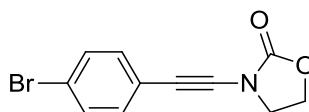

**17b**

**3-[(4-Bromophenyl)ethynyl]oxazolidin-2-one 17b.** Yield: 58%. White solid; Mp: 154 °C;  $^1\text{H}$  NMR (300 MHz,  $\text{CDCl}_3$ ):  $\delta$  7.39 (d,  $J$  = 8.4 Hz, 2H), 7.24 (d,  $J$  = 8.7 Hz, 2H), 4.45 (t,  $J$  = 7.8 Hz, 2H), 3.96 (t,  $J$  = 8.1 Hz, 2H);  $^{13}\text{C}$  NMR (75 MHz,  $\text{CDCl}_3$ ):  $\delta$  156.1, 133.2, 131.8, 122.7, 121.5, 80.3, 70.6, 63.4, 47.2; IR (ATR)  $\nu_{\text{max}}$  2982, 2904, 2241, 1740, 1397, 1239, 1065  $\text{cm}^{-1}$ ; ESIMS (positive mode): 266.0, 265.0, 224.0, 187.0, 173.0, 149.0, 140.0; ESIHRMS  $m/z$  calcd for  $\text{C}_{11}\text{H}_9\text{BrNO}_2$   $[\text{M}+\text{H}]^+$  265.9817, found 265.9821.

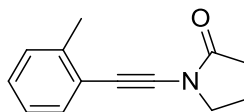

**18a**

**1-[(2-Tolyl)ethynyl]pyrrolidin-2-one 18a.** Yield: 55%. White solid; Mp: 93 °C;  $^1\text{H}$  NMR (300 MHz,  $\text{CDCl}_3$ ):  $\delta$  7.40 (d,  $J$  = 7.3 Hz, 1H), 7.19-7.17 (m, 2H), 7.15-7.08 (m, 1H), 3.78 (t,  $J$  = 7.1 Hz, 2H), 2.48 (t,  $J$  = 7.7 Hz, 2H), 2.44 (s, 3H), 2.17 (app. quint.,  $J$  = 7.7 Hz, 2H);  $^{13}\text{C}$  NMR (75

MHz, CDCl<sub>3</sub>):  $\delta$  175.8, 139.8, 131.6, 129.4, 127.9, 125.5, 122.5, 84.4, 71.6, 50.3, 29.8, 20.9, 18.9; IR (ATR)  $\nu_{\max}$  2989, 2897, 2235, 1707, 1393, 1221, 1110, 1062, 761 cm<sup>-1</sup>; ESIMS (positive mode): 222.1, 200.1, 201.1, 129.0; ESIHRMS  $m/z$  calcd for C<sub>13</sub>H<sub>14</sub>NO [M+H]<sup>+</sup> 200.1075, found 200.1075.

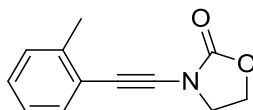

**18b**

**3-[(2-Tolyl)ethynyl]oxazolidin-2-one 18b.** Yield: 59%. White solid; Mp: 104 °C; <sup>1</sup>H NMR (300 MHz, CDCl<sub>3</sub>):  $\delta$  7.39 (d,  $J$  = 7.4 Hz, 1H), 7.21-7.18 (m, 2H), 7.16-7.09 (m, 1H), 4.46 (t,  $J$  = 8.0 Hz, 2H), 3.98 (t,  $J$  = 8.0 Hz, 2H), 2.43 (s, 3H); <sup>13</sup>C NMR (75 MHz, CDCl<sub>3</sub>):  $\delta$  156.0, 139.9, 131.6, 129.5, 128.2, 125.6, 122.0, 82.9, 70.1, 63.1, 47.2, 20.8; IR (ATR)  $\nu_{\max}$  2993, 2909, 2247, 1746, 1473, 1446, 1404, 1209, 1194, 1110, 1025, 746 cm<sup>-1</sup>; ESIMS (positive mode): 224.1, 202.1, 149.0, 129.0; ESIHRMS  $m/z$  calcd for C<sub>12</sub>H<sub>12</sub>NO<sub>2</sub> [M+H]<sup>+</sup> 202.0868, found 202.0866.

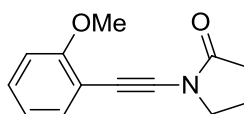

**19a**

**1-[(2-Methoxyphenyl)ethynyl]pyrrolidin-2-one 19a.** Yield: 62%. White solid; Mp: 95 °C; <sup>1</sup>H NMR (300 MHz, CDCl<sub>3</sub>):  $\delta$  7.41 (dd,  $J$  = 7.5 and 1.6 Hz, 1H), 7.25 (td,  $J$  = 7.9 and 1.7 Hz, 1H), 6.90-6.83 (m, 2H), 3.85 (s, 3H), 3.78 (t,  $J$  = 7.1 Hz, 2H), 2.45 (t,  $J$  = 7.7 Hz, 2H), 2.14 (app. quint.,  $J$  = 7.7 Hz, 2H); <sup>13</sup>C NMR (75 MHz, CDCl<sub>3</sub>):  $\delta$  175.8, 159.8, 133.7, 129.5, 120.4, 111.7, 110.5, 84.1, 68.7, 55.8, 50.2, 29.7, 18.9; IR (ATR)  $\nu_{\max}$  2970, 2901, 2243, 1711, 1397, 1247, 1117, 1012, 754 cm<sup>-1</sup>; ESIMS (positive mode): 238.1, 216.1, 213.1, 131.1; ESIHRMS  $m/z$  calcd for C<sub>13</sub>H<sub>14</sub>NO<sub>2</sub> [M+H]<sup>+</sup> 216.1025, found 216.1026.

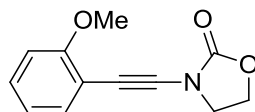

**19b**

**3-[(2-Methoxyphenyl)ethynyl]oxazolidin-2-one 19b.** Yield: 75%. Yellow solid; Mp: 87 °C;  $^1\text{H}$  NMR (300 MHz,  $\text{CDCl}_3$ ):  $\delta$  7.39 (dd,  $J = 7.5$  and  $1.7$  Hz, 1H), 7.26 (td,  $J = 7.9$  and  $1.7$  Hz, 1H), 6.87 (t,  $J = 7.5$  Hz, 1H), 6.84 (d,  $J = 8.4$  Hz, 1H), 4.42 (t,  $J = 7.6$  Hz, 2H), 3.96 (t,  $J = 7.6$  Hz, 2H), 3.83 (s, 3H);  $^{13}\text{C}$  NMR (75 MHz,  $\text{CDCl}_3$ ):  $\delta$  159.9, 156.0, 133.7, 129.8, 120.4, 111.2, 110.6, 82.6, 67.3, 63.2, 55.7, 47.1; IR (ATR)  $\nu_{\text{max}}$  2917, 2832, 2254, 1757, 1596, 1569, 1492, 1408, 1250, 1188, 1163, 1112, 1071, 1018, 746  $\text{cm}^{-1}$ ; ESIMS (positive mode): 435.2, 240.1, 218.1, 174.1, 146.1, 131.1; ESIHRMS  $m/z$  calcd for  $\text{C}_{12}\text{H}_{12}\text{NO}_3$   $[\text{M}+\text{H}]^+$  218.0817, found 218.0816.

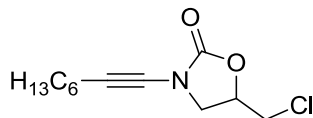

**21**

**5-(Chloromethyl)-3-(oct-1-yn-1-yl)oxazolidin-2-one 21.** Yield: 71%. Colorless oil;  $^1\text{H}$  NMR (300 MHz,  $\text{CDCl}_3$ ):  $\delta$  4.84-4.76 (m, 1H), 3.93 (A of ABX syst,  $J = 9.0$  and  $9.0$  Hz, 1H), 3.73-3.65 (m, 3H), 2.24 (t,  $J = 7.0$  Hz, 2H), 1.47 (app quint.,  $J = 7.4$  Hz, 2H), 1.37-1.20 (m, 6H), 0.84 (t,  $J = 6.6$  Hz, 3H);  $^{13}\text{C}$  NMR (75 MHz,  $\text{CDCl}_3$ ):  $\delta$  155.5, 72.5, 71.4, 69.5, 49.6, 44.4, 31.3, 28.7, 28.5, 22.5, 18.3, 14.0; IR (ATR)  $\nu_{\text{max}}$  2967, 2927, 2268, 1764, 1420, 1223, 1113, 1050, 742  $\text{cm}^{-1}$ ; ESIMS (positive mode): 301.1, 244.1, 183.0, 142.0, 111.0; ESIHRMS  $m/z$  calcd for  $\text{C}_{12}\text{H}_{19}\text{ClNO}_2$   $[\text{M}+\text{H}]^+$  244.1104, found 244.1109.

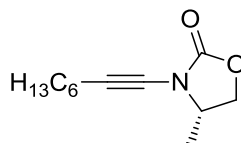

**22**

**(S)-4-Methyl-3-(oct-1-yn-1-yl)oxazolidin-2-one 22.** This compound has been previously reported.<sup>S8</sup> Yield: 61%.

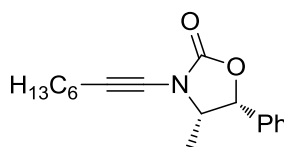

**23**

**(4S,5R)-4-Methyl-3-(oct-1-yn-1-yl)-5-phenyloxazolidin-2-one 23.** Yield: 72%. Sticky colorless oil;  $[\alpha]_D^{20}$  -6 (*c* 1.0, CHCl<sub>3</sub>); <sup>1</sup>H NMR (300 MHz, CDCl<sub>3</sub>):  $\delta$  7.39-7.34 (m, 3H), 7.27-7.23 (m, 2H), 5.68 (d, *J* = 8.1 Hz, 1H), 4.29 (dq, *J* = 8.1 and 6.6 Hz, 1H), 2.31 (t, *J* = 6.9 Hz, 2H), 1.57-1.47 (m, 2H), 1.41-1.26 (m, 6H), 0.90 (t, *J* = 6.6 Hz, 3H), 0.87 (t, *J* = 6.6 Hz, 3H); <sup>13</sup>C NMR (75 MHz, CDCl<sub>3</sub>):  $\delta$  156.1, 134.2, 128.9, 128.7, 126.0, 79.5, 72.3, 69.1, 58.1, 31.3, 28.8, 28.6, 22.6, 18.5, 14.8, 14.0; IR (ATR)  $\nu_{\max}$  2931, 2253, 1760, 1405, 1188, 1125 cm<sup>-1</sup>; ESIMS (positive mode): 286.2, 242.2, 215.2, 172.1, 118.1; ESIHRMS *m/z* calcd for C<sub>18</sub>H<sub>24</sub>NO<sub>2</sub> [M+H]<sup>+</sup> 286.1807, found 286.1809.

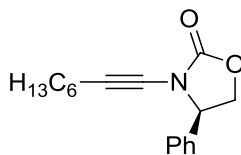

**24**

**(R)-3-(Oct-1-yn-1-yl)-4-phenyloxazolidin-2-one 24.** This compound has been previously reported.<sup>S9</sup> Yield: 28%.

<sup>S8</sup> Yao, B.; Liang, Z.; Niu, T.; Zhang, Y. *J. Org. Chem.* **2009**, 74, 4630.



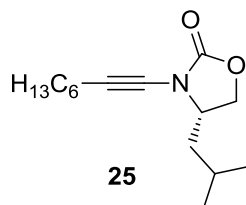

**(S)-4-iso-Butyl-3-(oct-1-yn-1-yl)oxazolidin-2-one 25.** Yield: 20%. Pale yellow oil;  $[\alpha]_D^{20} +49$  ( $c$  0.8,  $\text{CHCl}_3$ );  $^1\text{H}$  NMR (300 MHz,  $\text{CDCl}_3$ ):  $\delta$  4.51-4.43 (m, 1H), 4.01-3.95 (m, 2H), 2.31 (t,  $J = 6.9$  Hz, 2H), 1.92-1.83 (m, 1H), 1.79-1.70 (m, 1H), 1.57-1.47 (m, 2H), 1.44-1.24 (m, 7H), 0.96 (d,  $J = 6.7$  Hz, 3H), 0.94 (d,  $J = 6.5$  Hz, 3H), 0.82 (t,  $J = 6.8$  Hz, 3H);  $^{13}\text{C}$  NMR (75 MHz,  $\text{CDCl}_3$ ):  $\delta$  156.4, 72.5, 69.2, 69.1, 56.3, 41.9, 31.3, 28.7, 28.5, 24.5, 23.1, 22.6, 22.2, 18.5, 14.1; IR (ATR)  $\nu_{\text{max}}$  2963, 2923, 2864, 2264, 1771, 1468, 1409, 1196, 1109, 750  $\text{cm}^{-1}$ ; ESIMS (positive mode): 252.2, 196.1, 144.1; ESIHRMS  $m/z$  calcd for  $\text{C}_{15}\text{H}_{26}\text{NO}_2$   $[\text{M}+\text{H}]^+$  252.1964, found 252.1965.

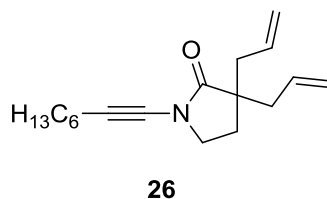

**3,3-Diallyl-1-(oct-1-yn-1-yl)pyrrolidin-2-one 26.** Yield: 82%. Colorless oil;  $^1\text{H}$  NMR (300 MHz,  $\text{CDCl}_3$ ):  $\delta$  5.63-5.50 (m, 2H), 4.97-4.92 (m, 4H), 3.31 (t,  $J = 7.1$  Hz, 2H), 2.21 (dd,  $J = 13.8$  and 6.6, 2H), 2.19 (t,  $J = 6.1$  Hz, 2H), 2.03 (dd,  $J = 13.7$  and 8.3 Hz, 2H), 1.82 (t,  $J = 7.3$  Hz, 2H), 1.36 (app. quint.,  $J = 7.1$  Hz, 2H), 1.27-1.10 (m, 6H), 0.72 (t,  $J = 6.7$  Hz, 3H);  $^{13}\text{C}$  NMR (75 MHz,  $\text{CDCl}_3$ ):  $\delta$  178.3, 132.9, 118.8, 71.8, 71.4, 47.0, 46.4, 41.1, 31.1, 28.6, 28.3, 27.2, 22.2, 18.3, 13.8; IR (ATR)  $\nu_{\text{max}}$  2959, 2935, 2261, 1712, 1397, 1219, 1085, 912  $\text{cm}^{-1}$ ; ESIMS (positive mode): 547.4, 296.2, 274.2, 204.1; ESIHRMS  $m/z$  calcd for  $\text{C}_{18}\text{H}_{28}\text{NO}$   $[\text{M}+\text{H}]^+$  274.2171, found 274.2173.

<sup>89</sup> Frederick, M. O.; Mulder, J. A.; Tracey, M. R.; Hsung, R. P.; Huang, J.; Kurtz, K. C. M.; Shen, L.; Douglas, C. J. *J. Am. Chem. Soc.* **2003**, *125*, 2368.

## Experimental Procedures and Characterization Data:

### Alkynylphosphonates from Alkynylcopper Reagents

#### General procedure for the synthesis of alkynylphosphonates from alkynylcopper reagents.

A 5 mL round bottom flask was successively charged with dialkylphosphite (8.0 mmol), the alkynylcopper reagent (2.0 mmol) and DMF (4 mL). The resulting bright yellow slurry was then treated with *N*-methylimidazole (315  $\mu$ L, 4.0 mmol) and the reaction mixture was vigorously stirred at room temperature and under an atmosphere of oxygen (balloon). After complete disappearance of the alkynylcopper reagent (complete dissolution to a deep blue homogeneous reaction mixture: typically 12-24h), the reaction was diluted with an aqueous mixture of saturated ammonium chloride and 28% ammonium hydroxide (1:1 solution) and extracted with diethyl ether. Combined organic layers were washed with brine, dried over  $\text{MgSO}_4$  and concentrated. The crude residue was finally purified by flash chromatography over silica gel to give the desired alkynylphosphonate.

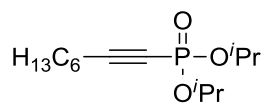

**30**

**Diisopropyl (oct-1-yn-1-yl)phosphonate 30.** Yield: 85% (91% on a 2.5 g scale). Colorless oil;  $^1\text{H}$  NMR (300 MHz,  $\text{CDCl}_3$ ):  $\delta$  4.51-4.34 (m, 2H), 2.01 (dt,  $J = 6.6$  Hz and  $J_{\text{H-P}} = 4.8$  Hz, 2H), 1.25 (tt,  $J = 7.8$  and 7.2 Hz, 2H), 1.11-0.96 (m, 6H), 1.02 (d,  $J = 6.6$  Hz, 12H), 0.56 (t,  $J = 6.3$  Hz, 3H);  $^{13}\text{C}$  NMR (75 MHz,  $\text{CDCl}_3$ ):  $\delta$  102.5 (d,  $J_{\text{C-P}} = 52.5$  Hz), 71.5 (d,  $J_{\text{C-P}} = 300.0$  Hz), 71.0 (d,  $J_{\text{C-P}} = 22.5$  Hz), 30.7, 28.1, 27.0, 23.4 (d,  $J_{\text{C-P}} = 4.5$  Hz), 23.2 (d,  $J_{\text{C-P}} = 4.9$  Hz), 22.1, 18.8, 13.5;  $^{31}\text{P}$  NMR (121 MHz,  $\text{CDCl}_3$ ):  $\delta$  -8.6; IR (ATR)  $\nu_{\text{max}}$  2979, 2213, 1377, 1257, 983  $\text{cm}^{-1}$ ; ESIMS (positive mode): 275.2, 191.1, 110.0; ESIHRMS  $m/z$  calcd for  $\text{C}_{14}\text{H}_{28}\text{O}_3\text{P}$   $[\text{M}+\text{H}]^+$  275.1776, found 275.1778.

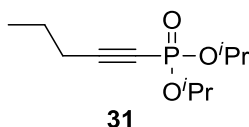

**Diisopropyl (pent-1-yn-1-yl)phosphonate 31.** Yield: 86% (92% on a 16.0 g scale). Colorless oil;  $^1\text{H}$  NMR (300 MHz,  $\text{CDCl}_3$ ):  $\delta$  4.67-4.60 (m, 2H), 2.24 (dt,  $J = 6.9$  Hz and  $J_{\text{H-P}} = 4.2$  Hz, 2H), 1.53 (tq,  $J = 7.5$  and  $7.2$  Hz, 2H), 1.28 (d,  $J = 7.2$  Hz, 12H), 0.93 (t,  $J = 6.6$  Hz, 3H);  $^{13}\text{C}$  NMR (75 MHz,  $\text{CDCl}_3$ ):  $\delta$  102.1 (d,  $J_{\text{C-P}} = 52.5$  Hz), 72.2 (d,  $J_{\text{C-P}} = 300.0$  Hz), 72.0 (d,  $J_{\text{C-P}} = 5.3$  Hz), 24.4 (d,  $J_{\text{C-P}} = 4.5$  Hz), 23.7 (d,  $J_{\text{C-P}} = 4.8$  Hz), 21.3, 21.2, 13.3;  $^{31}\text{P}$  NMR (121 MHz,  $\text{CDCl}_3$ ):  $\delta$  -8.7; IR (ATR)  $\nu_{\text{max}}$  2982, 2205, 1385, 1255, 981  $\text{cm}^{-1}$ ; ESIMS (positive mode): 233.1, 191.1, 149.0; ESIHRMS  $m/z$  calcd for  $\text{C}_{11}\text{H}_{22}\text{O}_3\text{P}$   $[\text{M}+\text{H}]^+$  233.1307, found 233.1305.

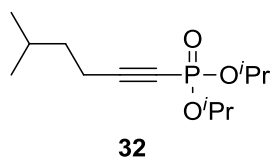

**Diisopropyl (5-methylhex-1-yn-1-yl)phosphonate 32** Yield: 96%. Pale yellow oil;  $^1\text{H}$  NMR (300 MHz,  $\text{CDCl}_3$ ):  $\delta$  4.67-4.60 (m, 2H), 2.26 (dt,  $J = 6.3$  Hz and  $J_{\text{H-P}} = 4.5$  Hz, 2H), 1.61 (app. sept.,  $J = 6.6$  Hz, 1H), 1.39 (dt,  $J = 7.2$  and  $6.9$  Hz, 2H), 1.28 (d,  $J = 6.3$  Hz, 12H), 0.82 (d,  $J = 6.6$  Hz, 6H);  $^{13}\text{C}$  NMR (75 MHz,  $\text{CDCl}_3$ ):  $\delta$  102.3 (d,  $J_{\text{C-P}} = 52.5$  Hz), 72.0 (d,  $J_{\text{C-P}} = 6.0$  Hz), 71.9 (d,  $J_{\text{C-P}} = 300.0$  Hz), 36.4, 27.4, 24.0 (d,  $J_{\text{C-P}} = 4.5$  Hz), 23.7 (d,  $J_{\text{C-P}} = 4.8$  Hz), 22.2, 17.4;  $^{31}\text{P}$  NMR (121 MHz,  $\text{CDCl}_3$ ):  $\delta$  -8.7; IR (ATR)  $\nu_{\text{max}}$  2982, 2197, 1381, 1257, 984  $\text{cm}^{-1}$ ; ESIMS (positive mode): 261.2, 219.1, 177.1; ESIHRMS  $m/z$  calcd for  $\text{C}_{13}\text{H}_{26}\text{O}_3\text{P}$   $[\text{M}+\text{H}]^+$  261.1620, found 261.1621.

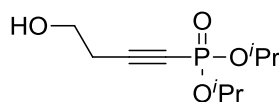

**33**

**Diisopropyl (4-hydroxybut-1-yn-1-yl)phosphonate 33.** Yield: 35%. Pale yellow oil;  $^1\text{H}$  NMR (300 MHz,  $\text{CDCl}_3$ ):  $\delta$  4.68-4.61 (m, 2H), 3.72 (t,  $J = 6.6$  Hz, 2H), 2.55 (td,  $J = 6.3$  Hz and  $J_{\text{H-P}} = 1.8$  Hz, 2H), 1.30 (d,  $J = 6.0$  Hz, 12H);  $^{13}\text{C}$  NMR (75 MHz,  $\text{CDCl}_3$ ):  $\delta$  100.0 (d,  $J_{\text{C-P}} = 53.3$  Hz), 73.0 (d,  $J_{\text{C-P}} = 300.0$  Hz), 72.6 (d,  $J_{\text{C-P}} = 6.0$  Hz), 60.0, 24.0 (d,  $J_{\text{C-P}} = 4.5$  Hz), 23.7 (d,  $J_{\text{C-P}} = 4.9$  Hz), 23.7;  $^{31}\text{P}$  NMR (121 MHz,  $\text{CDCl}_3$ ):  $\delta$  -8.7; IR (ATR)  $\nu_{\text{max}}$  3405, 2986, 2197, 1381, 1241, 984  $\text{cm}^{-1}$ ; ESIMS (positive mode): 235.1, 151.0, 133.0, 121.0; ESIHRMS  $m/z$  calcd for  $\text{C}_{10}\text{H}_{20}\text{O}_3\text{P}$   $[\text{M}+\text{H}]^+$  235.1099, found 235.1100.

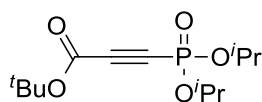

**34**

**Diisopropyl (tert-butoxycarbonylethynyl)phosphonate 34.** Yield: 48%. Orange-brown oil;  $^1\text{H}$  NMR (300 MHz,  $\text{CDCl}_3$ ):  $\delta$  4.67-4.60 (m, 2H), 1.38 (s, 9H), 1.26 (d,  $J = 6.3$  Hz, 12H);  $^{13}\text{C}$  NMR (75 MHz,  $\text{CDCl}_3$ ):  $\delta$  150.6, 87.4 (d,  $J_{\text{C-P}} = 45.8$  Hz), 85.4, 74.0 (d,  $J_{\text{C-P}} = 285.0$  Hz), 73.4 (d,  $J_{\text{C-P}} = 5.3$  Hz), 28.0, 23.9 (d,  $J_{\text{C-P}} = 4.5$  Hz), 23.6 (d,  $J_{\text{C-P}} = 4.9$  Hz);  $^{31}\text{P}$  NMR (121 MHz,  $\text{CDCl}_3$ ):  $\delta$  -11.6; IR (ATR)  $\nu_{\text{max}}$  2975, 1708, 1369, 1255, 1151, 983  $\text{cm}^{-1}$ ; ESIMS (positive mode): 291.1, 257.1, 193.0, 151.0; ESIHRMS  $m/z$  calcd for  $\text{C}_{13}\text{H}_{24}\text{O}_5\text{P}$   $[\text{M}+\text{H}]^+$  291.1361, found 291.1359.

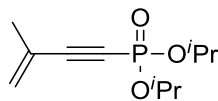

**35**

**Diisopropyl (3-methylbut-3-en-1-yn-1-yl)phosphonate 35.** Yield: 88%. Pale yellow oil;  $^1\text{H}$  NMR (300 MHz,  $\text{CDCl}_3$ ):  $\delta$  5.45 (br. s, 1H), 5.39 (br. s, 1H), 4.67-4.59 (m, 2H), 1.81 (s, 3H), 1.26 (d,  $J = 6.3$  Hz, 12H);  $^{13}\text{C}$  NMR (75 MHz,  $\text{CDCl}_3$ ):  $\delta$  127.5, 124.5, 99.3 (d,  $J_{\text{C-P}} = 51.8$  Hz), 78.8 (d,  $J_{\text{C-P}} = 300.0$  Hz), 72.2 (d,  $J_{\text{C-P}} = 6.0$  Hz), 23.9 (d,  $J_{\text{C-P}} = 4.5$  Hz), 23.7 (d,  $J_{\text{C-P}} = 4.8$  Hz),

22.1;  $^{31}\text{P}$  NMR (121 MHz,  $\text{CDCl}_3$ ):  $\delta$  -8.6; IR (ATR)  $\nu_{\text{max}}$  2979, 2182, 1377, 1258, 983  $\text{cm}^{-1}$ ; ESIMS (positive mode): 231.1, 189.1, 147.0; ESIHRMS  $m/z$  calcd for  $\text{C}_{11}\text{H}_{20}\text{O}_3\text{P}$   $[\text{M}+\text{H}]^+$  231.1150, found 231.1145.

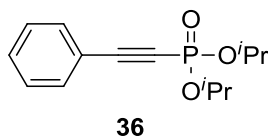

**Diisopropyl (phenylethynyl)phosphonate 36.** This compound has been previously reported.<sup>S10</sup>  
Yield: 71% (97% on a 2.6 g scale).

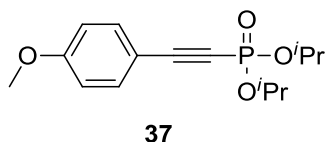

**Diisopropyl [(4-methoxyphenyl)ethynyl]phosphonate 37.** Yield: 58%. Pale yellow oil;  $^1\text{H}$  NMR (300 MHz,  $\text{CDCl}_3$ ):  $\delta$  7.45 (d,  $J$  = 9.0 Hz, 2H), 6.84 (d,  $J$  = 8.7 Hz, 2H), 4.80-4.72 (m, 2H), 3.79 (s, 3H), 1.37 (d,  $J$  = 6.0 Hz, 12H);  $^{13}\text{C}$  NMR (75 MHz,  $\text{CDCl}_3$ ):  $\delta$  161.6, 134.5, 114.5, 111.9, 99.0 (d,  $J_{\text{C-P}}$  = 52.5 Hz), 79.2 (d,  $J_{\text{C-P}}$  = 247.5 Hz), 72.1 (d,  $J_{\text{C-P}}$  = 5.3 Hz), 55.4, 24.1 (d,  $J_{\text{C-P}}$  = 4.5 Hz), 23.9 (d,  $J_{\text{C-P}}$  = 4.9 Hz);  $^{31}\text{P}$  NMR (121 MHz,  $\text{CDCl}_3$ ):  $\delta$  -8.1; IR (ATR)  $\nu_{\text{max}}$  2975, 2186, 1507, 1251, 981  $\text{cm}^{-1}$ ; ESIMS (positive mode): 297.1, 255.1, 213.0; ESIHRMS  $m/z$  calcd for  $\text{C}_{15}\text{H}_{22}\text{O}_3\text{P}$   $[\text{M}+\text{H}]^+$  297.1256, found 297.1259.

<sup>S10</sup> Gao, Y.; Wang, G.; Chen, L.; Xu, P.; Zhao, Y.; Zhou, Y.; Han, L.-B. *J. Am. Chem. Soc.* **2009**, *131*, 7956.

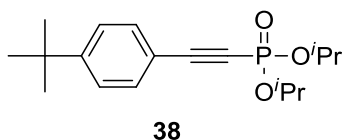

**Diisopropyl [(4-*tert*-butylphenyl)ethynyl]phosphonate 38.** Yield: 56%. Pale yellow solid; Mp: 65 °C;  $^1\text{H}$  NMR (300 MHz,  $\text{CDCl}_3$ ):  $\delta$  7.47 (d,  $J = 8.4$  Hz, 2H), 7.37 (d,  $J = 8.7$  Hz, 2H), 4.84-4.73 (m, 2H), 1.38 (d,  $J = 6.0$  Hz, 12H), 1.29 (s, 9H);  $^{13}\text{C}$  NMR (75 MHz,  $\text{CDCl}_3$ ):  $\delta$  154.5, 132.6, 125.9, 117.0, 98.9 (d,  $J_{\text{C-P}} = 53.3$  Hz), 79.6 (d,  $J_{\text{C-P}} = 292.5$  Hz), 72.5 (d,  $J_{\text{C-P}} = 6.0$  Hz), 35.3, 31.3, 24.2 (d,  $J_{\text{C-P}} = 4.5$  Hz), 23.9 (d,  $J_{\text{C-P}} = 4.8$  Hz);  $^{31}\text{P}$  NMR (121 MHz,  $\text{CDCl}_3$ ):  $\delta$  -8.1; IR (ATR)  $\nu_{\text{max}}$  2967, 2178, 1255, 990  $\text{cm}^{-1}$ ; ESIMS (positive mode): 323.2, 281.1, 239.1, 149.0; ESIHRMS  $m/z$  calcd for  $\text{C}_{18}\text{H}_{28}\text{O}_3\text{P}$   $[\text{M}+\text{H}]^+$  323.1776, found 323.1774.

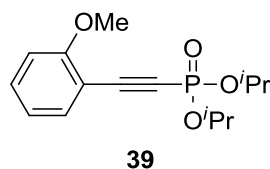

**Diisopropyl [(2-methoxyphenyl)ethynyl]phosphonate 39.** Yield: 93%. Yellow solid; Mp: 49 °C;  $^1\text{H}$  NMR (300 MHz,  $\text{CDCl}_3$ ):  $\delta$  7.40-7.28 (m, 2H), 6.90-6.79 (m, 2H), 4.80-4.68 (m, 2H), 3.77 (s, 3H), 1.33 (d,  $J = 6.1$  Hz, 6H), 1.32 (d,  $J = 5.9$  Hz, 6H);  $^{13}\text{C}$  NMR (75 MHz,  $\text{CDCl}_3$ ):  $\delta$  161.4 (d,  $J_{\text{C-P}} = 1.7$  Hz), 134.1, 132.1, 120.3, 110.7, 109.0 (d,  $J_{\text{C-P}} = 5.6$  Hz), 95.4 (d,  $J_{\text{C-P}} = 53.0$  Hz), 83.4 (d,  $J_{\text{C-P}} = 296.1$  Hz), 72.1 (d,  $J_{\text{C-P}} = 5.6$  Hz), 55.6, 23.8 (d,  $J_{\text{C-P}} = 4.5$  Hz), 23.5 (d,  $J_{\text{C-P}} = 4.8$  Hz);  $^{31}\text{P}$  NMR (121 MHz,  $\text{CDCl}_3$ ):  $\delta$  -8.2 (t,  $J = 9.0$  Hz); IR (ATR)  $\nu_{\text{max}}$  2978, 2181, 1596, 1485, 1259, 1245, 1160, 983, 888, 854, 747  $\text{cm}^{-1}$ ; ESIMS (positive mode): 319.1, 297.1, 213.0; ESIHRMS  $m/z$  calcd for  $\text{C}_{15}\text{H}_{22}\text{O}_4\text{P}$   $[\text{M}+\text{H}]^+$  297.1256, found 297.1257.

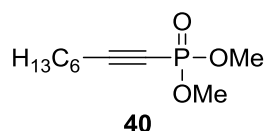

**Dimethyl (oct-1-yn-1-yl)phosphonate 40.** Yield: 65%. Colorless oil;  $^1\text{H}$  NMR (300 MHz,  $\text{CDCl}_3$ ):  $\delta$  3.46 (d,  $J_{\text{H-P}} = 12.3$  Hz, 6H), 2.07 (dt,  $J = 6.3$  Hz and  $J_{\text{H-P}} = 4.8$  Hz, 2H), 1.28 (tt,  $J = 7.8$  and  $6.9$  Hz, 2H), 1.14-0.97 (m, 6H), 0.59 (t,  $J = 6.6$  Hz, 3H);  $^{13}\text{C}$  NMR (75 MHz,  $\text{CDCl}_3$ ):  $\delta$  103.8 (d,  $J_{\text{C-P}} = 51.8$  Hz), 68.6 (d,  $J_{\text{C-P}} = 300.0$  Hz), 52.7 (d,  $J_{\text{C-P}} = 6.0$  Hz), 30.6, 28.0, 27.0, 22.1, 18.8, 13.6;  $^{31}\text{P}$  NMR (121 MHz,  $\text{CDCl}_3$ ):  $\delta$  -3.2; IR (ATR)  $\nu_{\text{max}}$  2951, 2201, 1456, 1264, 1026  $\text{cm}^{-1}$ ; ESIMS (positive mode): 219.1, 173.0, 112.0; ESIHRMS  $m/z$  calcd for  $\text{C}_{10}\text{H}_{20}\text{O}_3\text{P}$   $[\text{M}+\text{H}]^+$  219.1150, found 219.1147.

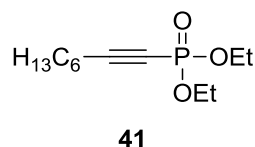

**Diethyl (oct-1-yn-1-yl)phosphonate 41.** This compound has been previously reported.<sup>S11</sup> Yield: 83% (96% on a 2.4 g scale).

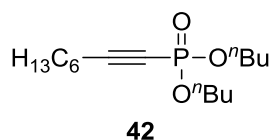

**Dibutyl (oct-1-yn-1-yl)phosphonate 42.** Yield: 87%. Colorless oil;  $^1\text{H}$  NMR (300 MHz,  $\text{CDCl}_3$ ): 3.99 (td,  $J = 6.6$  Hz and  $J_{\text{H-P}} = 6.6$  Hz, 4H), 2.26 (dt,  $J = 6.0$  Hz and  $J_{\text{H-P}} = 4.5$  Hz, 2H), 1.65-1.56 (m, 4H), 1.55-1.45 (m, 2H), 1.41-1.28 (m, 6H), 1.26-1.18 (m, 4H), 0.86 (t,  $J = 7.3$  Hz, 3H), 0.83 (t,  $J = 7.2$  Hz, 3H), 0.81 (t,  $J = 7.0$  Hz, 3H);  $^{13}\text{C}$  NMR (75 MHz,  $\text{CDCl}_3$ ):  $\delta$  103.1 (d,  $J_{\text{C-P}} = 52.5$  Hz), 70.3 (d,  $J_{\text{C-P}} = 292.5$  Hz), 66.5 (d,  $J_{\text{C-P}} = 5.3$  Hz), 32.1 (d,  $J_{\text{C-P}} = 7.0$  Hz), 31.1, 28.3, 27.3, 22.4, 19.1, 18.7, 13.9, 13.5;  $^{31}\text{P}$  NMR (121 MHz,  $\text{CDCl}_3$ ):  $\delta$  -3.4; IR (ATR)  $\nu_{\text{max}}$  2959,

<sup>S11</sup> Mavel, G.; Favelier R. *J. Chim. Phys.* **1967**, 64, 627.

2201, 1247, 1020  $\text{cm}^{-1}$ ; ESIMS (positive mode): 303.2, 247.1, 191.1; ESIHRMS  $m/z$  calcd for  $\text{C}_{16}\text{H}_{32}\text{O}_3\text{P}$   $[\text{M}+\text{H}]^+$  303.2089, found 303.2090.

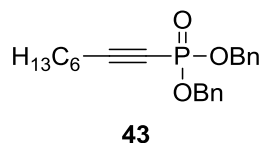

**Dibenzyl (oct-1-yn-1-yl)phosphonate 43.** Yield: 37%. Colorless oil;  $^1\text{H}$  NMR (300 MHz,  $\text{CDCl}_3$ ): 7.30-7.20 (m, 10H), 4.99 (d,  $J_{\text{H-P}} = 8.7$  Hz, 4H), 2.20 (dt,  $J = 6.3$  Hz and  $J_{\text{H-P}} = 4.5$  Hz, 2H), 1.43 (tt,  $J = 7.5$  and 6.6 Hz, 2H), 1.30-1.13 (m, 6H), 0.81 (t,  $J = 6.6$  Hz, 3H);  $^{13}\text{C}$  NMR (75 MHz,  $\text{CDCl}_3$ ):  $\delta$  135.7, 128.5, 127.6, 127.0, 104.4 (d,  $J_{\text{C-P}} = 53.3$  Hz), 70.3 (d,  $J_{\text{C-P}} = 292.5$  Hz), 68.3 (d,  $J_{\text{C-P}} = 5.3$  Hz), 31.2, 28.5, 27.3, 22.4, 19.2, 14.0;  $^{31}\text{P}$  NMR (121 MHz,  $\text{CDCl}_3$ ):  $\delta$  -5.5; IR (ATR)  $\nu_{\text{max}}$  2923, 2205, 1452, 1260, 990  $\text{cm}^{-1}$ ; ESIMS (positive mode): 371.18, 275.2, 191.1, 110.0; ESIHRMS  $m/z$  calcd for  $\text{C}_{22}\text{H}_{28}\text{O}_3\text{P}$   $[\text{M}+\text{H}]^+$  371.1776, found 371.1774.

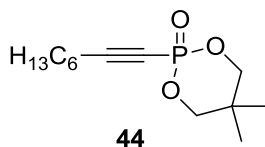

**5,5-Dimethyl-2-(oct-1-yn-1-yl)-1,3,2-dioxaphosphinane 2-oxide 44.** This compound has been previously reported.<sup>S12</sup> Yield: 39%.

<sup>S12</sup> Sajna, K. V.; Srinivas, V.; Kumara Swamy, K. C. *Adv. Synth. Catal.* **2010**, 352, 3069.



## Experimental Procedures and Characterization Data:

### Complex Ynamides and Alkynylphosphonates

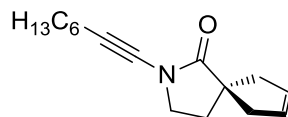

**45**

**2-(Oct-1-yn-1-yl)-2-azaspiro[4.4]non-7-en-1-one 45.** Yield: 80%. Colorless oil;  $^1\text{H}$  NMR (300 MHz,  $\text{CDCl}_3$ ):  $\delta$  5.63 (s, 2H), 3.58 (t,  $J = 6.7$  Hz, 2H), 2.84 (d,  $J = 14.7$  Hz, 2H), 2.32 (t,  $J = 7.0$  Hz, 2H), 2.28 (d,  $J = 14.8$  Hz, 2H), 2.05 (t,  $J = 6.8$  Hz, 2H), 1.54 (app. quint.,  $J = 7.9$  Hz, 2H), 1.41-1.22 (m, 6H), 0.88 (t,  $J = 6.7$  Hz, 3H);  $^{13}\text{C}$  NMR (75 MHz,  $\text{CDCl}_3$ ):  $\delta$  180.4, 128.3, 72.3, 72.0, 48.9, 47.5, 43.7, 36.0, 31.4, 29.0, 28.7, 22.6, 18.7, 14.2; IR (ATR)  $\nu_{\text{max}}$  2923, 2260, 1724, 1393, 1298, 1207, 1038, 671  $\text{cm}^{-1}$ ; ESIMS (positive mode): 491.4, 268.2, 246.2, 176.1, 138.1; ESIHRMS  $m/z$  calcd for  $\text{C}_{16}\text{H}_{24}\text{NO}$   $[\text{M}+\text{H}]^+$  246.1858, found 246.1857.

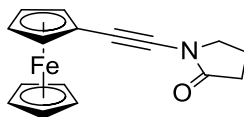

**46**

**1-(Ferrocenylethynyl)pyrrolidin-2-one 46.** Yield: 87%. Bright orange solid; Mp: 129 °C;  $^1\text{H}$  NMR (300 MHz,  $\text{CDCl}_3$ ):  $\delta$  4.39 (s, 2H), 4.18 (s, 5H), 4.15 (s, 2H), 3.67 (t,  $J = 7.1$  Hz, 2H), 2.40 (t,  $J = 8.0$  Hz, 2H), 2.08 (app. quint.,  $J = 7.5$  Hz, 2H);  $^{13}\text{C}$  NMR (75 MHz,  $\text{CDCl}_3$ ):  $\delta$  175.8, 76.4, 71.7, 71.0, 70.0, 68.7, 64.3, 50.1, 29.7, 18.7; IR (ATR)  $\nu_{\text{max}}$  2979, 2892, 2241, 1712, 1385, 1219, 1061, 817  $\text{cm}^{-1}$ ; ESIMS (positive mode): 294.1, 293.1; ESIHRMS  $m/z$  calcd for  $\text{C}_{16}\text{H}_{15}\text{NOFe}$   $[\text{M}]^+$  293.0503, found 293.0506.

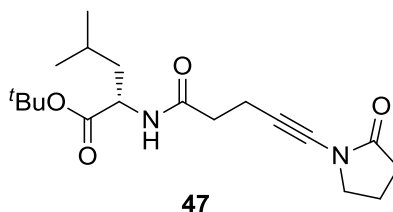

**(S)-5-[(1-*tert*-Butoxy-4-methyl-1-oxopentan-2-yl)amino]-5-oxo-1-(2-oxopyrrolidin-1-yl)-**

**pent-1-yne 47.** Yield: 90%. Brown oil;  $[\alpha]_D^{20}$  -3 (*c* 0.9, CHCl<sub>3</sub>); <sup>1</sup>H NMR (300 MHz, CDCl<sub>3</sub>):  $\delta$  6.14 (br. d, *J* = 8.1 Hz, 1H), 4.51 (dt, *J* = 11.9 and 6.3 Hz, 1H), 3.62 (t, *J* = 7.1 Hz, 2H), 2.65 (t, *J* = 7.0 Hz, 2H), 2.43 (t, *J* = 7.1 Hz, 2H), 2.39 (t, *J* = 8.2 Hz, 2H), 2.08 (app. quint., *J* = 7.5 Hz, 2H), 1.69-1.46 (m, 3H), 1.43 (s, 9H), 0.91 (d, *J* = 6.2 Hz, 6H); <sup>13</sup>C NMR (75 MHz, CDCl<sub>3</sub>):  $\delta$  176.0, 172.2, 170.7, 81.4, 72.2, 70.9, 51.1, 49.7, 41.5, 35.5, 29.4, 27.8, 24.7, 22.6, 21.9, 18.5, 14.9; IR (ATR)  $\nu_{\max}$  3294, 2967, 2908, 2363, 1724, 1665, 1535, 1373, 1255, 1144, 1065, 730 cm<sup>-1</sup>; ESIMS (positive mode): 723.4, 374.2, 373.2, 351.2, 295.2, 182.1; ESIHRMS *m/z* calcd for C<sub>19</sub>H<sub>31</sub>N<sub>2</sub>O<sub>4</sub> [M+H]<sup>+</sup> 351.2284, found 351.2286.

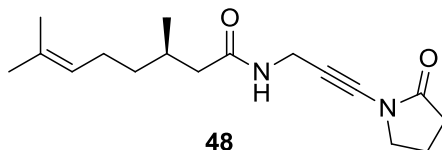

**(R)-3-(3,7-Dimethyloct-6-enamido)-1-(2-oxopyrrolidin-1-yl)-prop-1-yne 48.** Yield: 84%.

White solid; Mp: 84 °C;  $[\alpha]_D^{20}$  -1 (*c* 0.9, CHCl<sub>3</sub>); <sup>1</sup>H NMR (300 MHz, CDCl<sub>3</sub>):  $\delta$  6.43 (br. t, *J* = 4.7 Hz, 1H), 4.95 (br. t, *J* = 5.9 Hz, 1H), 4.06 (d, *J* = 5.2 Hz, 2H), 3.54 (t, *J* = 7.1 Hz, 2H), 2.29 (t, *J* = 7.9 Hz, 2H), 2.09 (app. quint, *J* = 9.3 Hz, 1H), 2.00 (app. quint., *J* = 7.6 Hz, 2H), 1.93-1.81 (m, 4H), 1.54 (s, 3H), 1.46 (s, 3H), 1.28-1.19 (m, 1H), 1.12-1.02 (m, 1H), 0.80 (d, *J* = 6.1 Hz, 3H); <sup>13</sup>C NMR (75 MHz, CDCl<sub>3</sub>):  $\delta$  176.3, 172.2, 131.1, 124.2, 73.8, 68.6, 49.7, 43.8, 36.7, 30.2, 29.4, 29.0, 25.5, 25.3, 19.3, 18.6, 17.5; IR (ATR)  $\nu_{\max}$  3278, 2967, 2900, 2261, 1728, 1649, 1535, 1401, 1223, 1069, 888, 730 cm<sup>-1</sup>; ESIMS (positive mode): 313.2, 291.2, 140.1; ESIHRMS *m/z* calcd for C<sub>17</sub>H<sub>27</sub>N<sub>2</sub>O<sub>2</sub> [M+H]<sup>+</sup> 291.2073, found 291.2076.

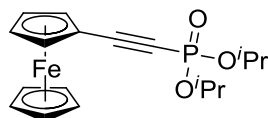

49

**Diisopropyl (ferrocenylethynyl)phosphonate 49.** Yield: 71%. Orange-brown solid; Mp: 47 °C;  $^1\text{H}$  NMR (300 MHz,  $\text{CDCl}_3$ ): 4.65-4.58 (m, 2H), 4.38 (app. t,  $J = 1.8$  Hz, 2H), 4.14 (t,  $J = 1.9$  Hz, 2H), 4.07 (s, 5H), 1.25 (d,  $J = 6.3$  Hz, 6H), 1.24 (d,  $J = 6.3$  Hz, 6H);  $^{13}\text{C}$  NMR (75 MHz,  $\text{CDCl}_3$ ):  $\delta$  99.4 (d,  $J_{\text{C-P}} = 54.5$  Hz), 76.0 (d,  $J_{\text{C-P}} = 300.6$  Hz), 72.1 (d,  $J_{\text{C-P}} = 1.6$  Hz), 71.6 (d,  $J_{\text{C-P}} = 5.5$  Hz), 70.0, 69.8, 59.9 (d,  $J_{\text{C-P}} = 5.7$  Hz), 23.6 (d,  $J_{\text{C-P}} = 4.5$  Hz), 23.4 (d,  $J_{\text{C-P}} = 4.8$  Hz);  $^{31}\text{P}$  NMR (121 MHz,  $\text{CDCl}_3$ ):  $\delta$  -8.0; IR (ATR)  $\nu_{\text{max}}$  2982, 2896, 2158, 1385, 1255, 1058, 983, 927, 793  $\text{cm}^{-1}$ ; ESIMS (positive mode): 398.1, 397.1, 375.1, 374.1, 333.0, 291.0; ESIHRMS  $m/z$  calcd for  $\text{C}_{18}\text{H}_{23}\text{O}_3\text{PFe} [\text{M}]^+$  374.0734, found 374.0732.

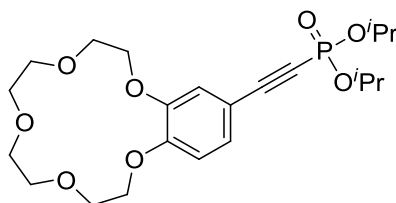

50

**Diisopropyl [(2,3,5,6,8,9,11,12-octahydrobenzo[b][1,4,7,10,13]pentaoxacyclopentadecin-15-yl)ethynyl]phosphonate 50.** Yield: 34%. Colorless oil;  $^1\text{H}$  NMR (300 MHz,  $\text{CDCl}_3$ ): 7.08 (dd,  $J = 8.3$  and  $1.6$  Hz, 1H), 6.94 (d,  $J = 1.7$  Hz, 1H), 6.73 (d,  $J = 8.3$  Hz, 1H), 4.78-4.67 (m, 2H), 4.09-4.03 (m, 4H), 3.85-3.82 (m, 4H), 3.68 (s, 8H), 1.33 (d,  $J = 6.2$  Hz, 6H), 1.32 (d,  $J = 6.1$  Hz, 6H);  $^{13}\text{C}$  NMR (75 MHz,  $\text{CDCl}_3$ ):  $\delta$  151.5, 148.7, 126.9, 117.3, 113.0, 111.9, 98.9 (d,  $J_{\text{C-P}} = 53.3$  Hz), 78.5 (d,  $J_{\text{C-P}} = 299.0$  Hz), 72.2 (d,  $J_{\text{C-P}} = 5.5$  Hz), 71.1, 70.4, 70.3, 69.3, 69.2, 69.0, 68.7, 24.0 (d,  $J_{\text{C-P}} = 4.5$  Hz), 23.7 (d,  $J_{\text{C-P}} = 4.9$  Hz);  $^{31}\text{P}$  NMR (121 MHz,  $\text{CDCl}_3$ ):  $\delta$  -7.8; IR (ATR)  $\nu_{\text{max}}$  2982, 2896, 2178, 1511, 1247, 1136, 987, 793, 726  $\text{cm}^{-1}$ ; ESIMS (positive mode): 480.2, 479.2, 457.2, 373.1; ESIHRMS  $m/z$  calcd for  $\text{C}_{22}\text{H}_{34}\text{O}_8\text{P} [\text{M}+\text{H}]^+$  457.1991, found 457.1994.

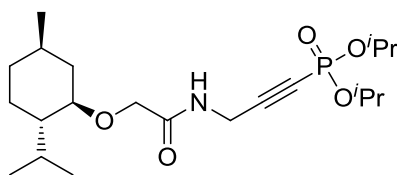

**51**

**(1*R*,3*R*,4*S*)-Diisopropyl (menthoxyacetamido)prop-1-yn-1-ylphosphonate 51.** Yield: 76%. Colorless oil;  $[\alpha]_D^{20}$  -37 (*c* 0.8, CHCl<sub>3</sub>); <sup>1</sup>H NMR (300 MHz, CDCl<sub>3</sub>): 6.79 (br. t, *J* = 5.4 Hz, 1H), 4.63-4.56 (m, 2H), 4.09 (A of AB syst., *J* = 4.2 Hz, 1H), 4.08 (B of AB syst., *J* = 4.2 Hz, 1H), 3.95 (A' of A'B' syst., *J* = 15.2 Hz, 1H), 3.74 (B' of A'B' syst., *J* = 15.2 Hz, 1H), 3.02 (td, *J* = 10.6 and 4.1 Hz, 1H), 1.99 (hept. d, *J* = 7.0 and 2.7 Hz, 1H), 1.94-1.88 (m, 1H), 1.55-1.48 (m, 2H), 1.31-1.10 (obs. m, 2H), 1.22 (d, *J* = 6.3 Hz, 12H), 0.91-0.69 (obs. m, 3H), 0.79 (d, *J* = 6.5 Hz, 6H), 0.65 (d, *J* = 7.0 Hz, 3H); <sup>13</sup>C NMR (75 MHz, CDCl<sub>3</sub>):  $\delta$  170.0, 95.1 (d, *J*<sub>C-P</sub> = 50.6 Hz), 80.2, 74.4 (d, *J*<sub>C-P</sub> = 293.8 Hz), 72.2 (d, *J*<sub>C-P</sub> = 5.6 Hz), 67.4, 47.8, 39.8, 34.1, 31.2, 28.5 (d, *J*<sub>C-P</sub> = 4.5 Hz), 25.8, 23.8 (d, *J*<sub>C-P</sub> = 4.3 Hz), 23.6 (d, *J*<sub>C-P</sub> = 4.5 Hz), 23.0, 22.0, 20.8, 16.0; <sup>31</sup>P NMR (121 MHz, CDCl<sub>3</sub>):  $\delta$  -9.9 (quint, *J* = 6.3 Hz); IR (ATR)  $\nu_{\max}$  2971, 2919, 2209, 1677, 1519, 1381, 1255, 1105, 983, 774 cm<sup>-1</sup>; ESIMS (positive mode): 853.5, 438.2, 416.3, 374.2, 236.1, 194.0; ESIHRMS *m/z* calcd for C<sub>21</sub>H<sub>39</sub>NO<sub>5</sub>P [M+H]<sup>+</sup> 416.2566, found 416.2561.

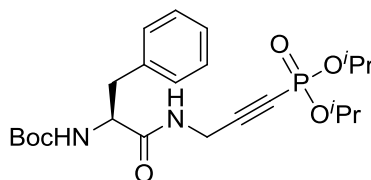

**52**

**(*S*)-Diisopropyl {3-[2-(*tert*-Butoxycarbonylamino)-3-phenylpropanamido]-prop-1-yn-1-yl}phosphonate 52.** Yield: 79%. Pale yellow oil;  $[\alpha]_D^{20}$  -2 (*c* 0.9, CHCl<sub>3</sub>); <sup>1</sup>H NMR (300 MHz, CDCl<sub>3</sub>): 7.42 (br. t, *J* = 5.5 Hz, 1H), 7.26-7.10 (m, 5H), 5.31 (d, *J* = 8.1 Hz, 1H), 4.76-4.56 (m, 2H), 4.42-4.27 (br. m, 1H), 4.13-3.92 (br. m, 2H), 3.08 (A of ABX syst., *J* = 13.7 and 5.8 Hz, 1H), 2.89 (br. B of ABX syst., *J* = 13.2 and 6.4 Hz, 1H), 1.31-1.24 (m, 21H); <sup>13</sup>C NMR (75 MHz, CDCl<sub>3</sub>):  $\delta$  171.4, 155.3, 136.5, 129.3, 128.4, 126.7, 95.9 (d, *J*<sub>C-P</sub> = 50.9 Hz), 77.8 (d, *J*<sub>C-P</sub> = 298.0 Hz), 74.1 (d, *J*<sub>C-P</sub> = 5.7 Hz), 72.4, 55.3, 38.6, 29.1 (d, *J*<sub>C-P</sub> = 4.4 Hz), 28.2, 23.8 (d, *J*<sub>C-P</sub> =

4.5 Hz), 23.6 (d,  $J_{\text{C-P}} = 4.7$  Hz);  $^{31}\text{P}$  NMR (121 MHz,  $\text{CDCl}_3$ ):  $\delta$  -9.8; IR (ATR)  $\nu_{\text{max}}$  3278, 2986, 2217, 1681, 1499, 1365, 1254, 1168, 990, 742  $\text{cm}^{-1}$ ; ESIMS (positive mode): 489.2, 467.2, 411.2, 367.2, 325.1; ESIHRMS  $m/z$  calcd for  $\text{C}_{23}\text{H}_{36}\text{N}_2\text{O}_6\text{P}$   $[\text{M}+\text{H}]^+$  467.2311, found 467.2310.

## *Supporting Information*

### **$^1\text{H}$ and $^{13}\text{C}$ NMR spectra**

Click-Alkynylation of N- and P- Nucleophiles by Oxidative Cross-Coupling with Alkynylcopper Reagents

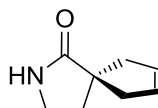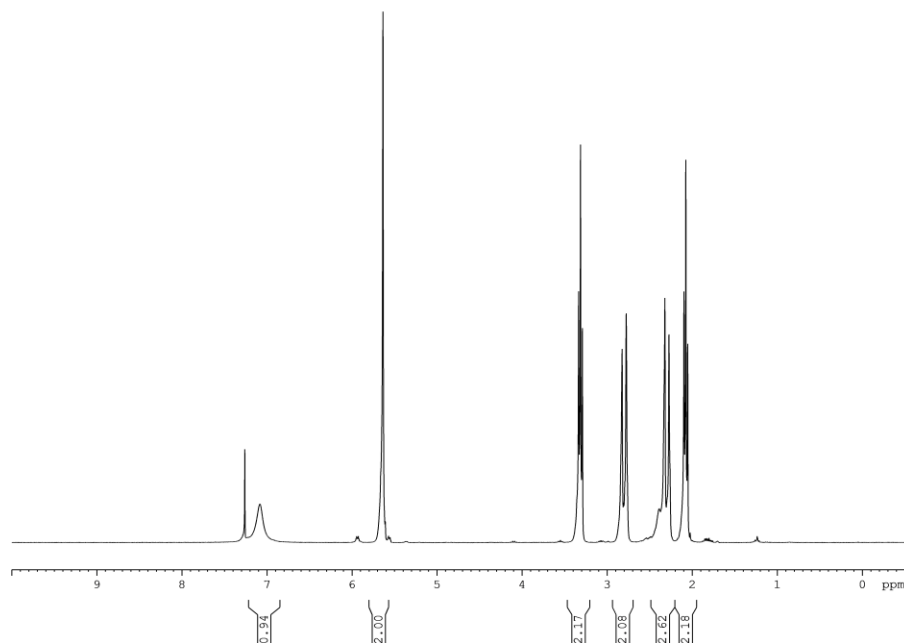

```
Current Data Parameters
NAME      fc36kjpgyrolidnone cyclopentene
EXPNO     12
PROCNO    1

F2 - Acquisition Parameters
Date_     20110913
Time      1.40
INSTRUM   spect
PROBHD    5 mm BBI 1H-BB
PULPROG   zg30
TD         32768
SOLVENT   CDCl3
NS         16
DS         0
SWH        6313.131 Hz
FIDRES     0.192661 Hz
AQ         2.5952756 sec
RG         203.2
DW         79.200 usec
DE         6.50 usec
TE         295.1 K
D1         1.00000000 sec
MCREST     0.00000000 sec
MCWRK     0.01500000 sec

===== CHANNEL f1 =====
NUC1       1H
P1         6.20 usec
PL1        0.00 dB
SFO1       300.1328512 MHz

F2 - Processing parameters
SI         32768
SF         300.1300055 MHz
WDW        EM
SSB        0
LB         0.10 Hz
GB         0
PC         1.00

1D NMR plot parameters
CX         20.00 cm
CY         10.42 cm
F1P        3.551 ppm
F1         1065.62 Hz
F2P        1.839 ppm
F2         551.85 Hz
PPMCM      0.08559 ppm/cm
HZCM       25.68851 Hz/cm
```

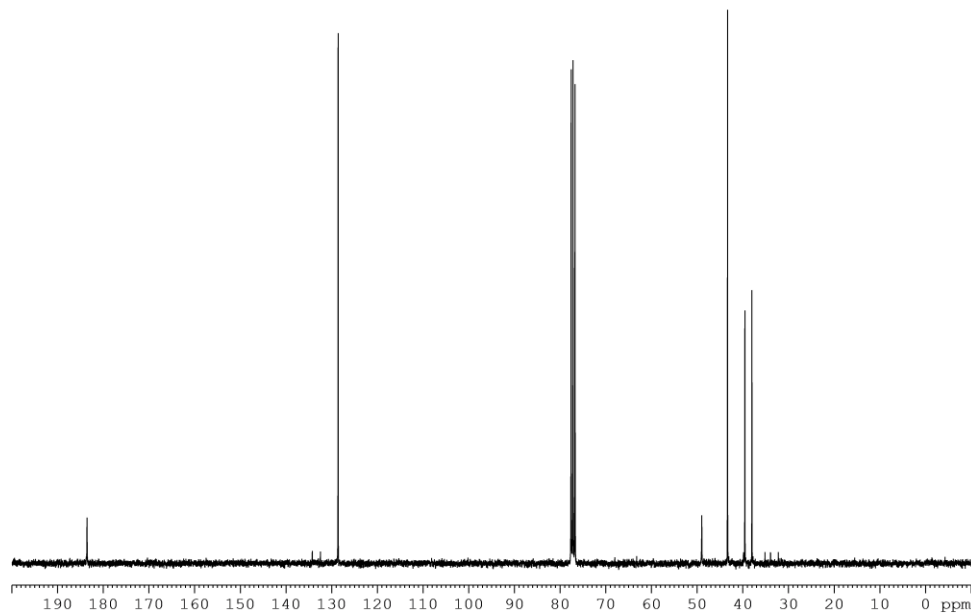

```
Current Data Parameters
NAME      fc36kjpgyrolidnone cyclopentene
EXPNO     10
PROCNO    1

F2 - Acquisition Parameters
Date_     20110913
Time      1.21
INSTRUM   spect
PROBHD    5 mm BBI 1H-BB
PULPROG   zgpg30
TD         65536
SOLVENT   CDCl3
NS         2000
DS         4
SWH        17985.611 Hz
FIDRES     0.274439 Hz
AQ         1.8219508 sec
RG         1824.6
DW         27.800 usec
DE         10.00 usec
TE         295.2 K
D1         2.00000000 sec
d11        0.03000000 sec
DELTA      1.89999998 sec
MCREST     0.00000000 sec
MCWRK     0.01500000 sec

===== CHANNEL f1 =====
NUC1       13C
P1         9.00 usec
PL1        -6.00 dB
SFO1       75.4752953 MHz

===== CHANNEL f2 =====
CPDPRG2   waitz16
NUC2       1H
PCPD2     80.00 usec
PL2        0.00 dB
PL12       22.00 dB
PL13       22.00 dB
SFO2       300.1312005 MHz

F2 - Processing parameters
SI         32768
SF         75.4677421 MHz
WDW        EM
SSB        0
LB         1.00 Hz
GB         0
PC         1.40

1D NMR plot parameters
CX         20.00 cm
CY         7.47 cm
F1P        200.000 ppm
F1         15093.55 Hz
F2P        -10.000 ppm
F2         -754.68 Hz
PPMCM      10.50000 ppm/cm
HZCM       792.41132 Hz/cm
```

Click-Alkynylation of *N*- and *P*- Nucleophiles by Oxidative Cross-Coupling with Alkynylcopper Reagents

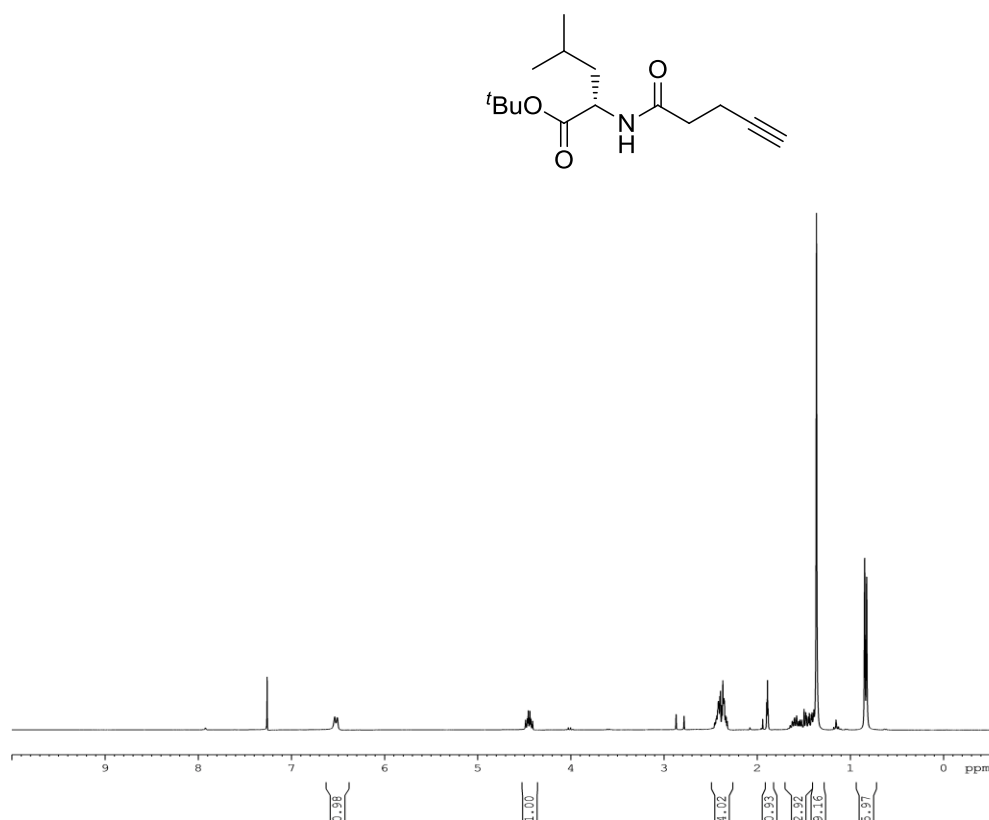

Current Data Parameters  
NAME fc35g100  
EXPNO 30  
PROCNO 1

F2 - Acquisition Parameters  
Date\_ 20110901  
Time 12.04  
INSTRUM spect  
PROBHD 5 mm BBI 1H-BB  
PULPROG zg30  
TD 32768  
SOLVENT CDCl3  
NS 16  
DS 0  
SWH 6313.131 Hz  
FIDRES 0.192661 Hz  
AQ 2.5952756 sec  
RG 28.5  
DW 79.200 usec  
DE 6.50 usec  
TE 294.4 K  
D1 1.00000000 sec  
MCREST 0.00000000 sec  
MCWRK 0.01500000 sec

===== CHANNEL f1 =====  
NUC1 1H  
P1 6.20 usec  
PL1 0.00 dB  
SFO1 300.1328512 MHz

F2 - Processing parameters  
SI 32768  
SF 300.1300055 MHz  
WDW EM  
SSB 0  
LB 0.10 Hz  
GB 0  
PC 1.00

1D NMR plot parameters  
CX 20.00 cm  
CY 61.05 cm  
F1P 2.696 ppm  
F1 809.12 Hz  
F2P 0.415 ppm  
F2 124.46 Hz  
PPMCM 0.11406 ppm/cm  
HZCM 34.23280 Hz/cm

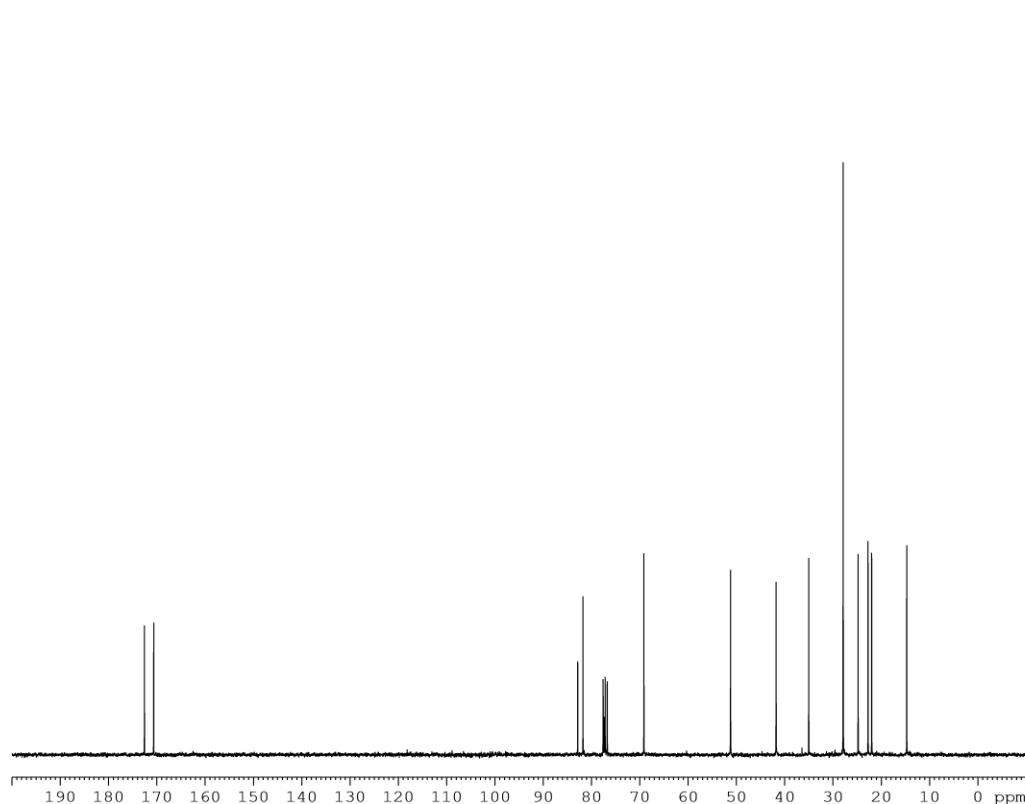

Current Data Parameters  
NAME fc35g100  
EXPNO 51  
PROCNO 1

F2 - Acquisition Parameters  
Date\_ 20110901  
Time 12.28  
INSTRUM spect  
PROBHD 5 mm BBI 1H-BB  
PULPROG zgpg30  
TD 65536  
SOLVENT CDCl3  
NS 200  
DS 4  
SWH 17985.611 Hz  
FIDRES 0.274439 Hz  
AQ 1.8219508 sec  
RG 1625.5  
DW 27.800 usec  
DE 10.00 usec  
TE 294.7 K  
D1 2.00000000 sec  
d11 0.03000000 sec  
DELTA 1.89999998 sec  
MCREST 0.00000000 sec  
MCWRK 0.01500000 sec

===== CHANNEL f1 =====  
NUC1 13C  
P1 9.00 usec  
PL1 -6.00 dB  
SFO1 75.4752953 MHz

===== CHANNEL f2 =====  
CPDPRG2 waltz16  
NUC2 1H  
PCPD2 80.00 usec  
PL2 0.00 dB  
PL12 22.00 dB  
PL13 22.00 dB  
SFO2 300.1312005 MHz

F2 - Processing parameters  
SI 32768  
SF 75.4677482 MHz  
WDW EM  
SSB 0  
LB 1.00 Hz  
GB 0  
PC 1.40

1D NMR plot parameters  
CX 20.00 cm  
CY 9.38 cm  
F1P 200.000 ppm  
F1 15093.55 Hz  
F2P -10.000 ppm  
F2 -754.68 Hz  
PPMCM 10.50000 ppm/cm  
HZCM 792.41138 Hz/cm



Click-Alkynylation of N- and P- Nucleophiles by Oxidative Cross-Coupling with Alkynylcopper Reagents

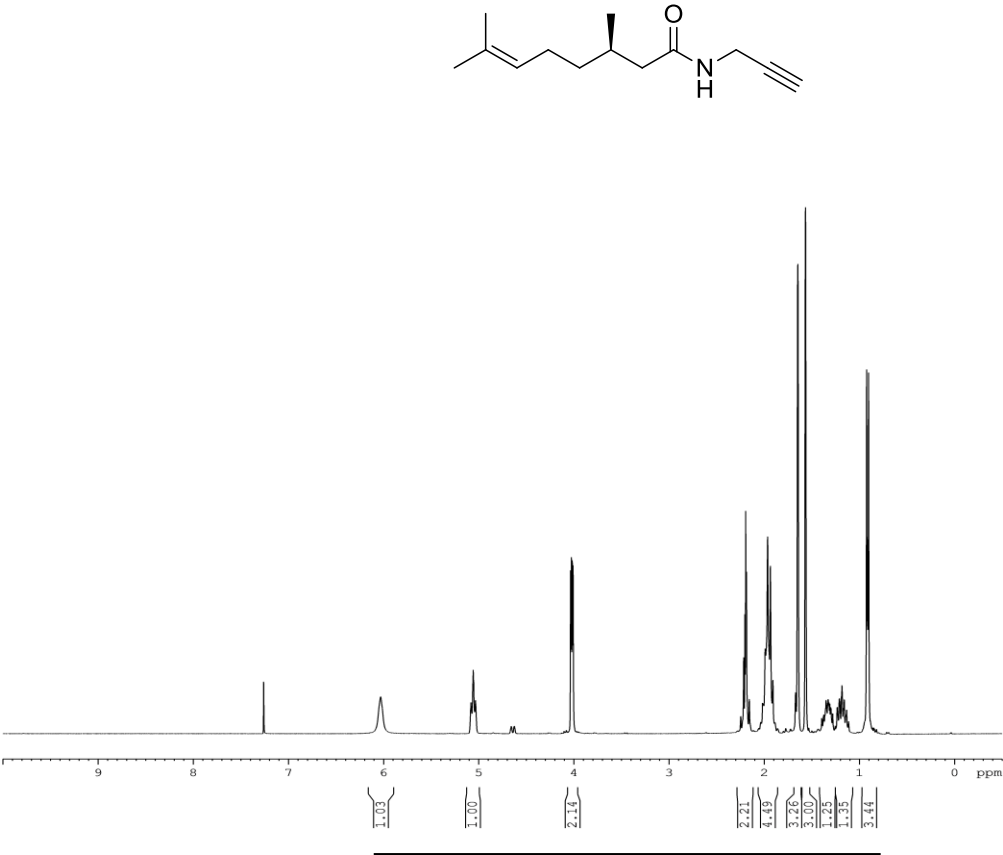

Current Data Parameters  
NAME fc35kj618  
EXPNO 12  
PROCNO 1

F2 - Acquisition Parameters  
Date\_ 20110901  
Time 7.18  
INSTRUM spect  
PROBHD 5 mm BBI 1H-BB  
PULPROG zg30  
TD 32768  
SOLVENT CDCl3  
NS 16  
DS 0  
SWH 6313.131 Hz  
FIDRES 0.192661 Hz  
AQ 2.5952756 sec  
RG 57  
DW 79.200 usec  
DE 6.50 usec  
TE 294.5 K  
D1 1.00000000 sec  
MCREST 0.00000000 sec  
MCWRK 0.01500000 sec

===== CHANNEL f1 =====  
NUC1 1H  
P1 6.20 usec  
PL1 0.00 dB  
SFO1 300.1328512 MHz

F2 - Processing parameters  
SI 32768  
SF 300.1300061 MHz  
WDW EM  
SSB 0  
LB 0.10 Hz  
GB 0  
PC 1.00

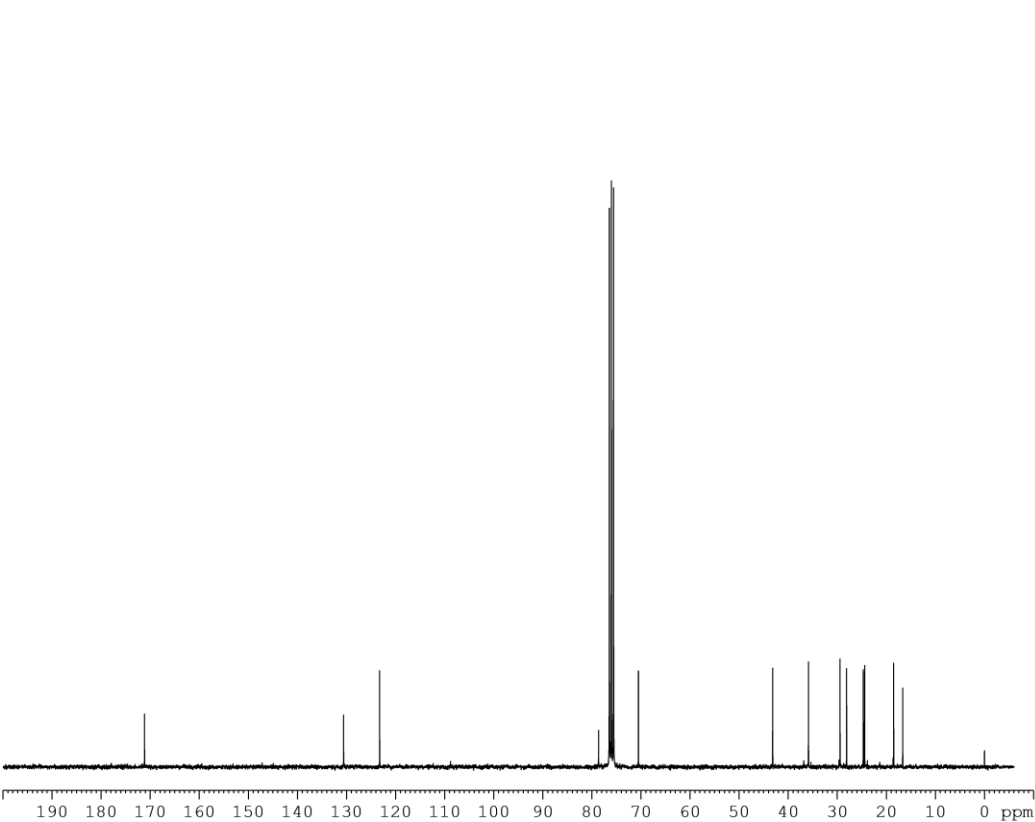

Current Data Parameters  
NAME fc46kj618bis  
EXPNO 11  
PROCNO 1

F2 - Acquisition Parameters  
Date\_ 20111115  
Time 20.28  
INSTRUM spect  
PROBHD 5 mm QNP 1H/13  
PULPROG zgpg30  
TD 32768  
SOLVENT CDCl3  
NS 2048  
DS 4  
SWH 18115.941 Hz  
FIDRES 0.552855 Hz  
AQ 0.9044468 sec  
RG 11585.2  
DW 27.600 usec  
DE 10.00 usec  
TE 294.9 K  
D1 2.00000000 sec  
d11 0.03000000 sec  
DELTA 1.89999998 sec  
MCREST 0.00000000 sec  
MCWRK 0.01500000 sec

===== CHANNEL f1 =====  
NUC1 13C  
P1 5.10 usec  
PL1 -6.00 dB  
SFO1 75.4764278 MHz

===== CHANNEL f2 =====  
CPDPRG2 waltz16  
NUC2 1H  
PCPD2 80.00 usec  
PL2 -6.00 dB  
PL12 15.80 dB  
PL13 15.80 dB  
SFO2 300.1312005 MHz

F2 - Processing parameters  
SI 32768  
SF 75.4678261 MHz  
WDW EM  
SSB 0  
LB 1.00 Hz  
GB 0  
PC 1.40

Click-Alkynylation of N- and P- Nucleophiles by Oxidative Cross-Coupling with Alkynylcopper Reagents

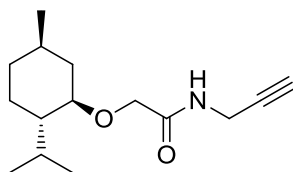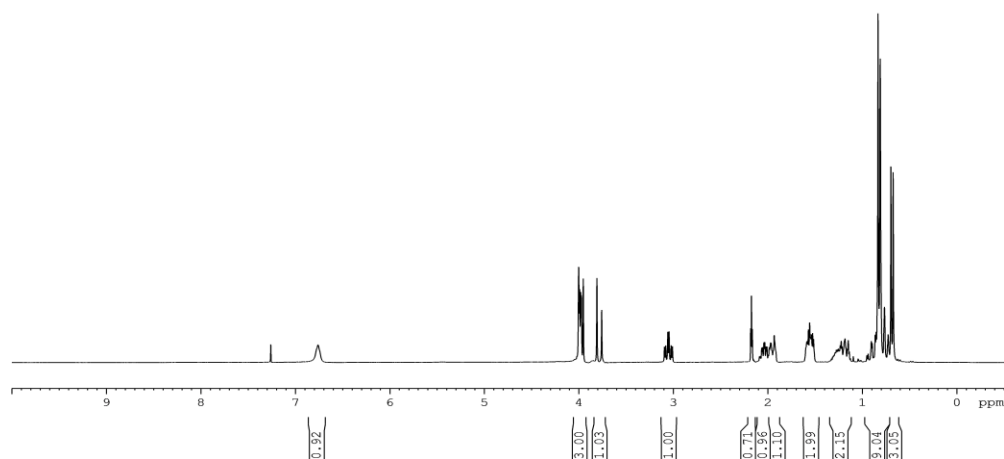

```
Current Data Parameters
NAME      fc35G101
EXPNO     22
PROCNO    1

F2 - Acquisition Parameters
Date_     20110901
Time      10.09
INSTRUM   spect
PROBHD    5 mm BBI 1H-BB
PULPROG   zg30
TD         32768
SOLVENT   CDCl3
NS         16
DS         0
SWH        6313.131 Hz
FIDRES     0.192661 Hz
AQ         2.5952756 sec
RG         25.4
DW         79.200 usec
DE         6.50 usec
TE         294.5 K
D1         1.00000000 sec
MCREST     0.00000000 sec
MCWRK      0.01500000 sec

===== CHANNEL f1 =====
NUC1       1H
P1         6.20 usec
PL1        0.00 dB
SFO1       300.1328512 MHz

F2 - Processing parameters
SI         32768
SF         300.1300057 MHz
WDW        EM
SSB        0
LB         0.10 Hz
GB         0
PC         1.00
```

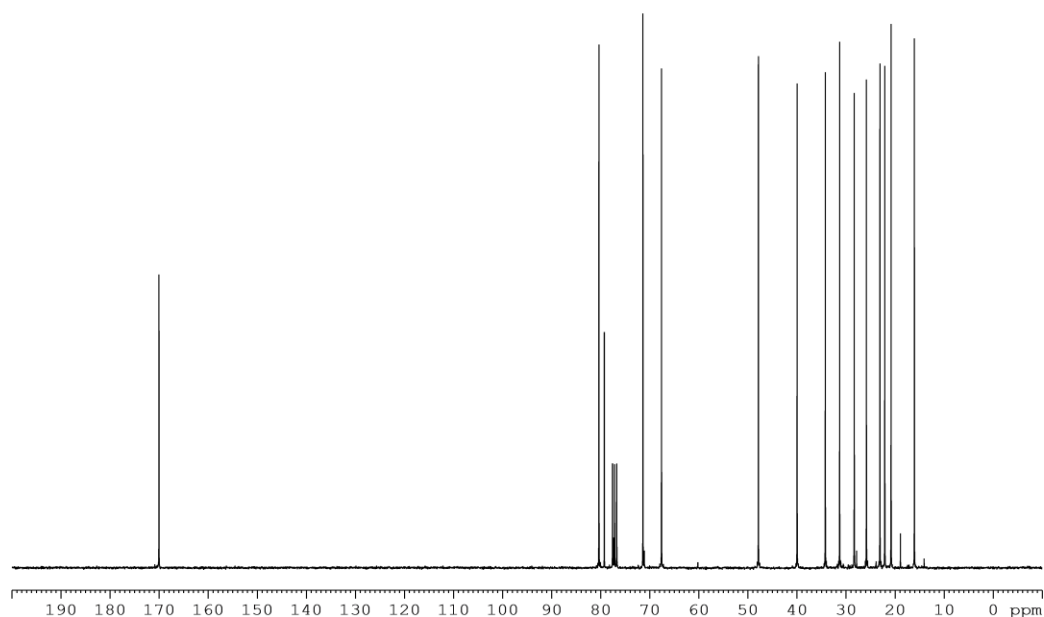

```
Current Data Parameters
NAME      fc35G101
EXPNO     20
PROCNO    1

F2 - Acquisition Parameters
Date_     20110901
Time      9.50
INSTRUM   spect
PROBHD    5 mm BBI 1H-BB
PULPROG   zgpg30
TD         65536
SOLVENT   CDCl3
NS         2000
DS         4
SWH        17985.611 Hz
FIDRES     0.274439 Hz
AQ         1.8219508 sec
RG         1625.5
DW         27.800 usec
DE         10.00 usec
TE         294.7 K
D1         2.00000000 sec
d11        0.03000000 sec
DELTA      1.89999998 sec
MCREST     0.00000000 sec
MCWRK      0.01500000 sec

===== CHANNEL f1 =====
NUC1       13C
P1         9.00 usec
PL1        -6.00 dB
SFO1       75.4752953 MHz

===== CHANNEL f2 =====
CPDPRG2   waltz16
NUC2       1H
PCPD2     80.00 usec
PL2        0.00 dB
PL12       22.00 dB
PL13       22.00 dB
SFO2       300.1312005 MHz

F2 - Processing parameters
SI         32768
SF         75.4677515 MHz
WDW        EM
SSB        0
LB         1.00 Hz
GB         0
PC         1.40

1D NMR plot parameters
CX         20.00 cm
CY         5.45 cm
F1P        200.000 ppm
F1         15093.55 Hz
F2P        -10.000 ppm
F2         -754.68 Hz
PPMCM      10.50000 ppm/cm
HZCM       792.41138 Hz/cm
```

Click-Alkynylation of N- and P- Nucleophiles by Oxidative Cross-Coupling with Alkynylcopper Reagents

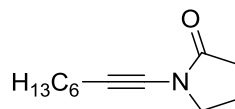

7a

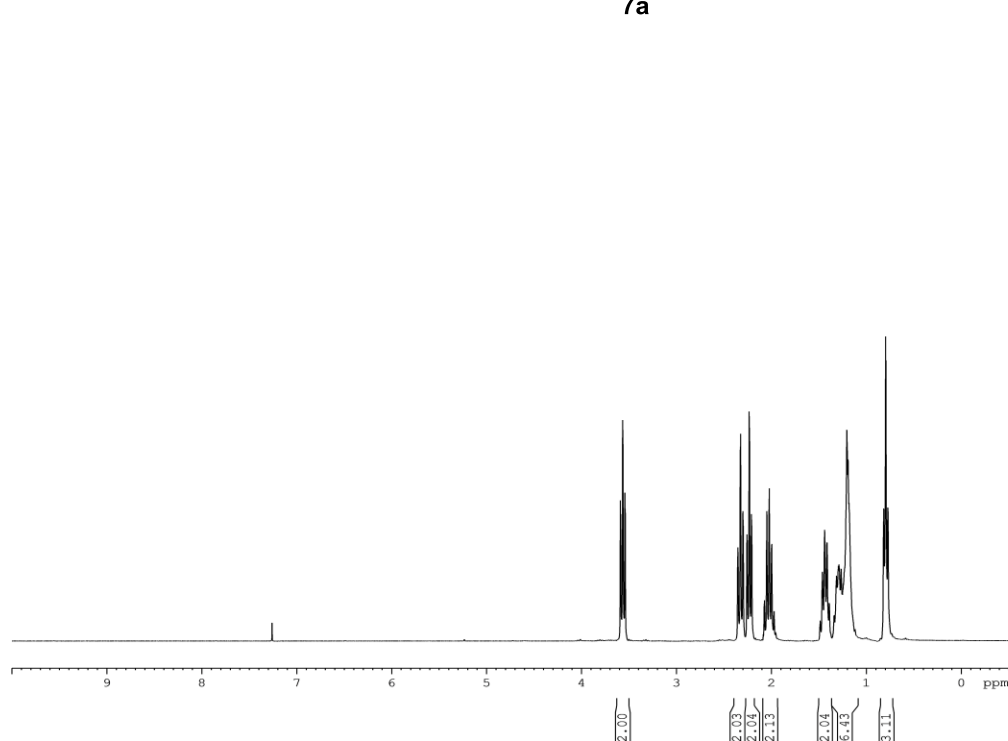

```
Current Data Parameters
NAME          fcl2ge28a
EXPNO         12
PROCNO        1

F2 - Acquisition Parameters
Date_         20110325
Time_         7.30
INSTRUM       spect
PROBHD        5 mm BBI 1H-BB
PULPROG       zg30
TD            32768
SOLVENT       CDCl3
NS            16
DS            0
SWH           6313.131 Hz
FIDRES        0.192661 Hz
AQ            2.5952756 sec
RG            35.9
DW            79.200 usec
DE            6.50 usec
TE            293.4 K
D1            1.00000000 sec
MCREST        0.00000000 sec
MCWRK         0.01500000 sec

===== CHANNEL f1 =====
NUC1           1H
P1             6.20 usec
PL1            0.00 dB
SFO1          300.1328512 MHz

F2 - Processing parameters
SI            32768
SF            300.1300061 MHz
WDW           EM
SSB            0
LB            0.10 Hz
GB            0
PC            1.00

1D NMR plot parameters
CX            20.00 cm
CY            8.60 cm
F1P           10.000 ppm
F1            3001.30 Hz
F2P           -0.500 ppm
F2            -150.06 Hz
PMCM          0.52500 ppm/cm
HZCM          157.56825 Hz/cm
```

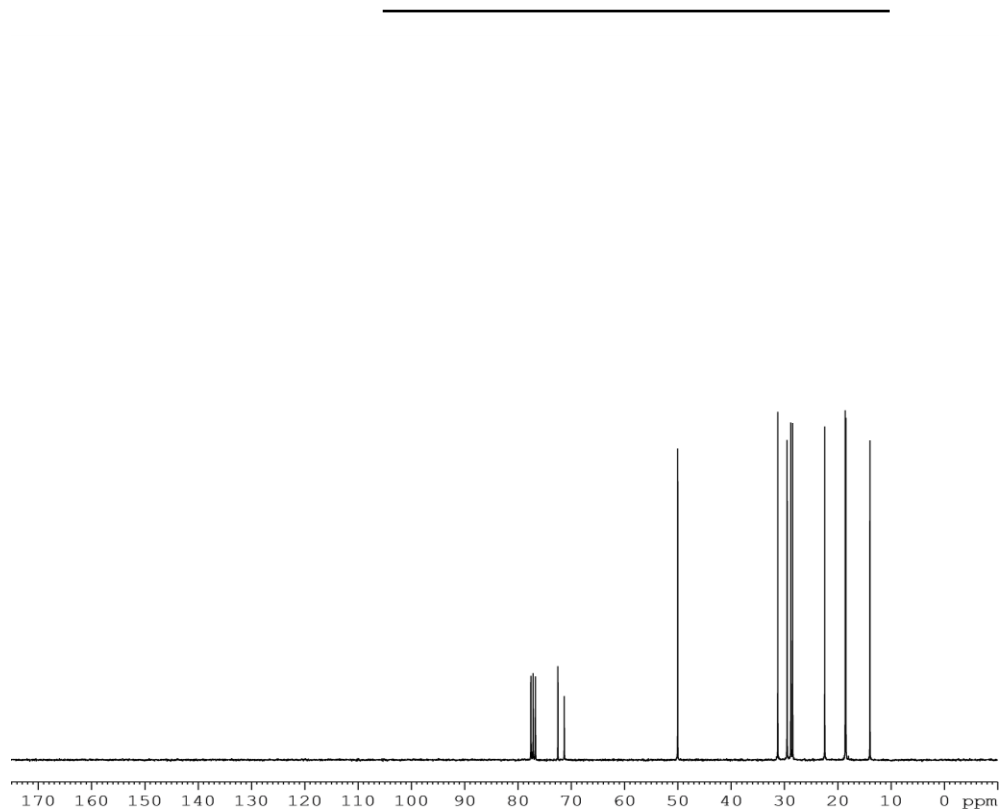

```
Current Data Parameters
NAME          fcl2ge28a
EXPNO         10
PROCNO        1

F2 - Acquisition Parameters
Date_         20110325
Time_         7.11
INSTRUM       spect
PROBHD        5 mm BBI 1H-BB
PULPROG       zgpg30
TD            65536
SOLVENT       CDCl3
NS            2000
DS            4
SWH           17985.611 Hz
FIDRES        0.274439 Hz
AQ            1.8219508 sec
RG            1625.5
DW            27.800 usec
DE            10.00 usec
TE            293.5 K
D1            2.00000000 sec
d11           0.03000000 sec
DELTA         1.89999998 sec
MCREST        0.00000000 sec
MCWRK         0.01500000 sec

===== CHANNEL f1 =====
NUC1           13C
P1             9.00 usec
PL1            -6.00 dB
SFO1          75.4752953 MHz

===== CHANNEL f2 =====
CPDPRG2       waltz16
NUC2           1H
PCPD2         80.00 usec
PL2            0.00 dB
PL12           22.00 dB
PL13           22.00 dB
SFO2          300.1312005 MHz

F2 - Processing parameters
SI            32768
SF            75.4677498 MHz
WDW           EM
SSB            0
LB            1.00 Hz
GB            0
PC            1.40
```

Click-Alkynylation of N- and P- Nucleophiles by Oxidative Cross-Coupling with Alkynylcopper Reagents

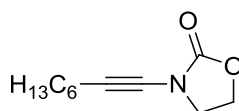

7b

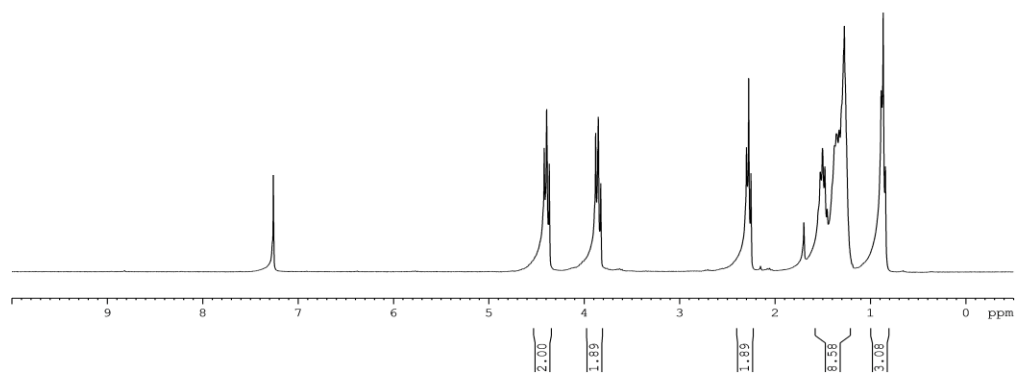

```
Current Data Parameters
NAME      fc28ge027
EXPNO     12
PROCNO    1

F2 - Acquisition Parameters
Date_     20110714
Time      2.31
INSTRUM   spect
PROBHD    5 mm BBI 1H-BB
PULPROG   zg30
TD         32768
SOLVENT   CDCl3
NS         16
DS         0
SWH        6313.131 Hz
FIDRES     0.192661 Hz
AQ         2.5952756 sec
RG         128
DW         79.200 usec
DE         6.50 usec
TE         294.5 K
D1         1.00000000 sec
MCREST     0.00000000 sec
MCWRK     0.01500000 sec

===== CHANNEL f1 =====
NUC1       1H
P1         6.20 usec
PL1        0.00 dB
SFO1       300.1328512 MHz

F2 - Processing parameters
SI         32768
SF         300.1300049 MHz
WDW        EM
SSB        0
LB         0.10 Hz
GB         0
PC         1.00
```

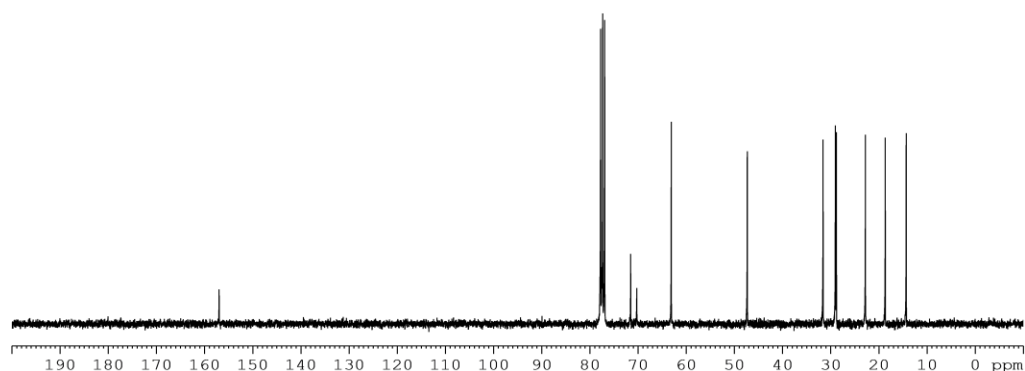

```
Current Data Parameters
NAME      fc28ge027
EXPNO     10
PROCNO    1

F2 - Acquisition Parameters
Date_     20110714
Time      2.12
INSTRUM   spect
PROBHD    5 mm BBI 1H-BB
PULPROG   zgpg30
TD         65536
SOLVENT   CDCl3
NS         2048
DS         4
SWH        17985.611 Hz
FIDRES     0.274439 Hz
AQ         1.8219508 sec
RG         1824.6
DW         27.800 usec
DE         10.00 usec
TE         294.6 K
D1         2.00000000 sec
d11        0.03000000 sec
DELTA      1.89999998 sec
MCREST     0.00000000 sec
MCWRK     0.01500000 sec

===== CHANNEL f1 =====
NUC1       13C
P1         9.00 usec
PL1        -6.00 dB
SFO1       75.4752953 MHz

===== CHANNEL f2 =====
CPDPRG2   waltz16
NUC2       1H
PCPD2     80.00 usec
PL2        0.00 dB
PL12       22.00 dB
PL13       22.00 dB
SFO2       300.1312005 MHz

F2 - Processing parameters
SI         32768
SF         75.4677271 MHz
WDW        EM
SSB        0
LB         1.00 Hz
GB         0
PC         1.40
```

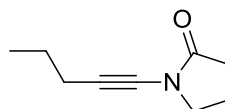

10a

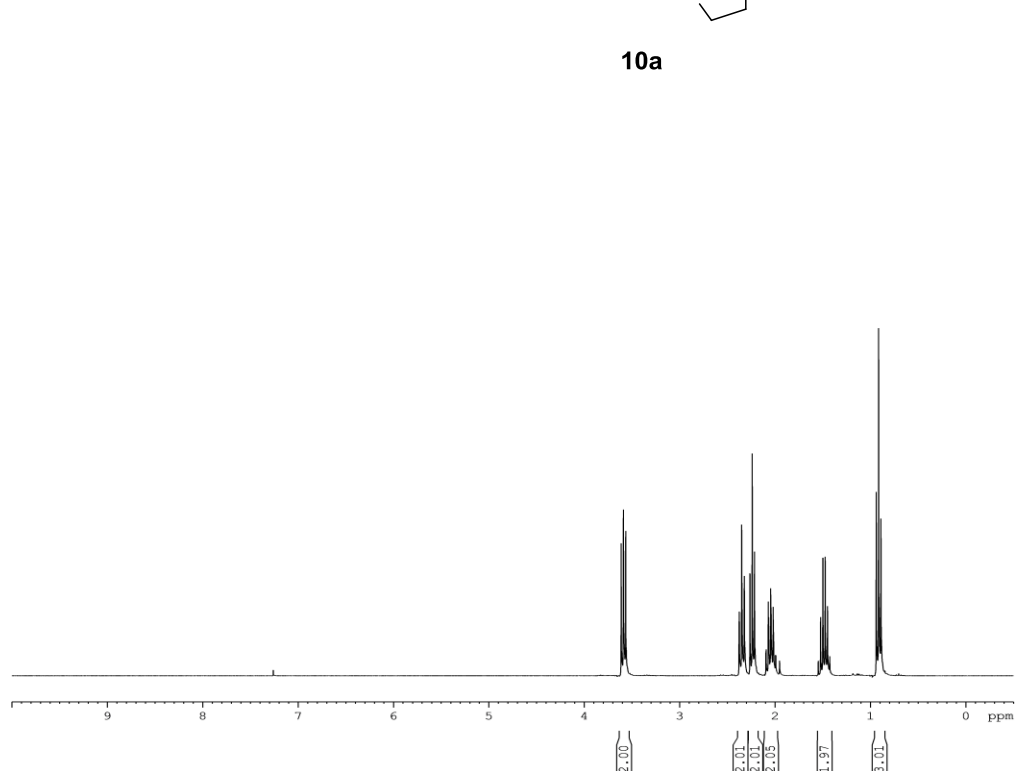

```
Current Data Parameters
NAME      fcl4ge030b
EXPNO     12
PROCNO    1

F2 - Acquisition Parameters
Date_     20110408
Time      9.57
INSTRUM   spect
PROBHD    5 mm BBI 1H-BB
PULPROG   zg30
TD         32768
SOLVENT   CDC13
NS         15
DS         0
SWH        6313.131 Hz
FIDRES     0.192661 Hz
AQ         2.5952756 sec
RG         80.6
DW         79.200 usec
DE         6.50 usec
TE         294.2 K
D1         1.00000000 sec
MCREST     0.00000000 sec
MCWRK     0.01500000 sec

===== CHANNEL f1 =====
NUC1       1H
P1         6.20 usec
PL1        0.00 dB
SFO1       300.1328512 MHz

F2 - Processing parameters
SI         32768
SF         300.1300063 MHz
WDW        EM
SSB        0
LB         0.10 Hz
GB         0
PC         1.00
```

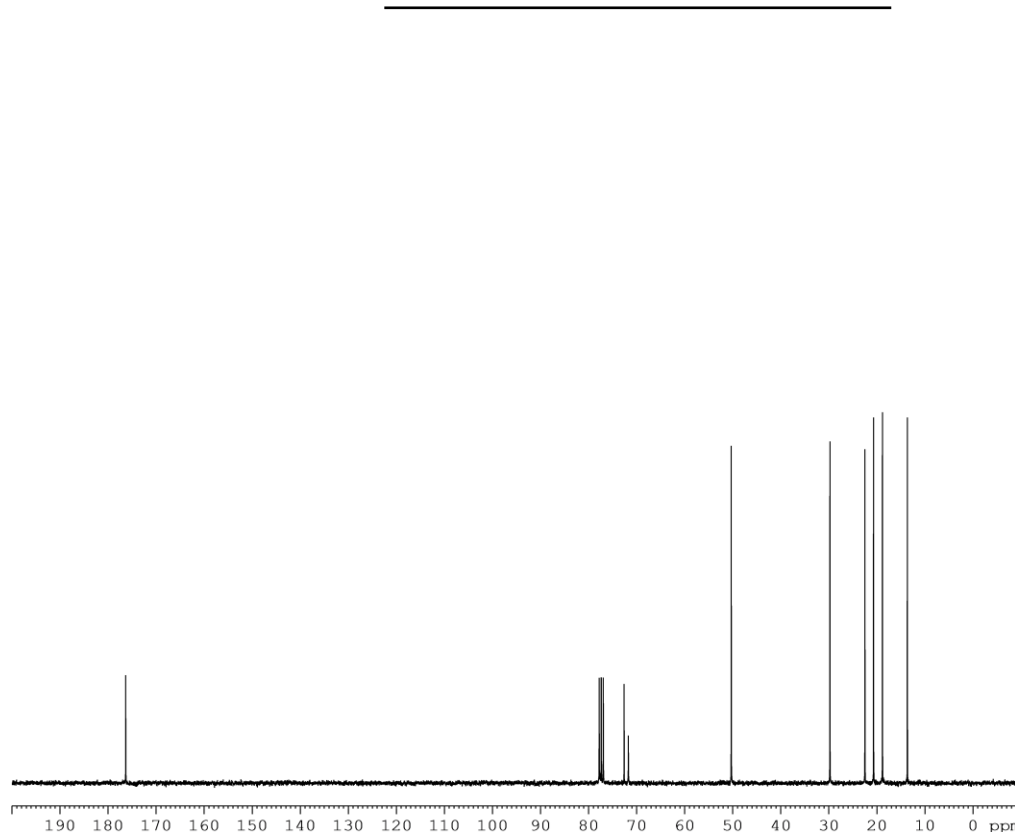

```
Current Data Parameters
NAME      fcl4ge030b
EXPNO     10
PROCNO    1

F2 - Acquisition Parameters
Date_     20110408
Time      7.25
INSTRUM   spect
PROBHD    5 mm BBI 1H-BB
PULPROG   zgpg30
TD         65536
SOLVENT   CDC13
NS         1024
DS         4
SWH        17985.611 Hz
FIDRES     0.274439 Hz
AQ         1.8219508 sec
RG         1625.5
DW         27.800 usec
DE         10.00 usec
TE         294.2 K
D1         2.00000000 sec
d11        0.03000000 sec
DELTA      1.89999998 sec
MCREST     0.00000000 sec
MCWRK     0.01500000 sec

===== CHANNEL f1 =====
NUC1       13C
P1         9.00 usec
PL1        -6.00 dB
SFO1       75.4752953 MHz

===== CHANNEL f2 =====
CPDPRG2   waltz16
NUC2       1H
PCPD2      80.00 usec
PL2        0.00 dB
PL12       22.00 dB
PL13       22.00 dB
SFO2       300.1312005 MHz

F2 - Processing parameters
SI         32768
SF         75.4677320 MHz
WDW        EM
SSB        0
LB         1.00 Hz
GB         0
PC         1.40
```

*Click-Alkynylation of N- and P- Nucleophiles by Oxidative Cross-Coupling with Alkynylcopper Reagents*

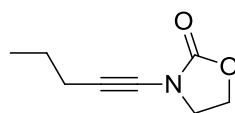

**10b**

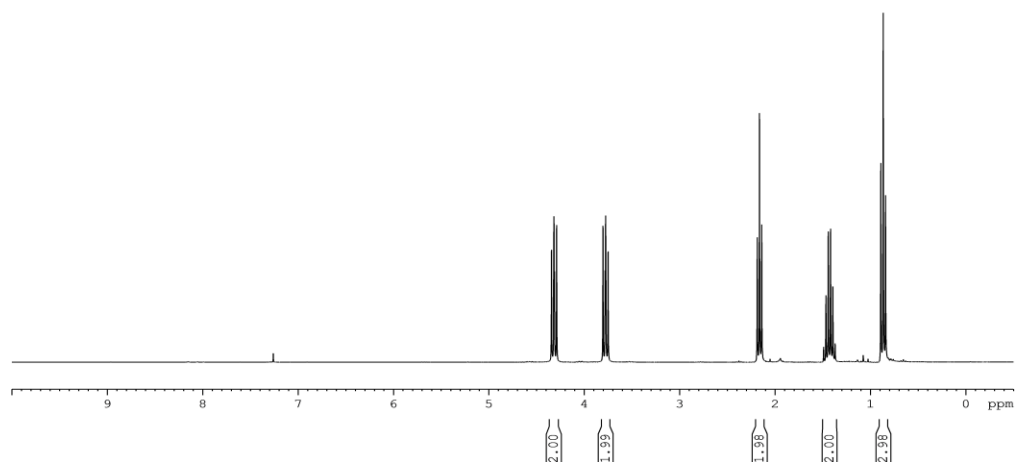

```
Current Data Parameters
NAME      FC12GE029B
EXPNO     12
PROCNO    1

F2 - Acquisition Parameters
Date_     20110326
Time      14.09
INSTRUM   spect
PROBHD    5 mm BBI 1H-BB
PULPROG   zg30
TD         32768
SOLVENT   CDCl3
NS         16
DS         0
SWH        6313.131 Hz
FIDRES     0.192661 Hz
AQ         2.5952756 sec
RG         35.9
DW         79.200 usec
DE         6.50 usec
TE         293.7 K
D1         1.00000000 sec
MCREST    0.00000000 sec
MCWRK     0.01500000 sec

===== CHANNEL f1 =====
NUC1       1H
P1         6.20 usec
PL1        0.00 dB
SFO1       300.1328512 MHz

F2 - Processing parameters
SI         32768
SF         300.1300057 MHz
WDW        EM
SSB        0
LB         0.10 Hz
GB         0
PC         1.00
```

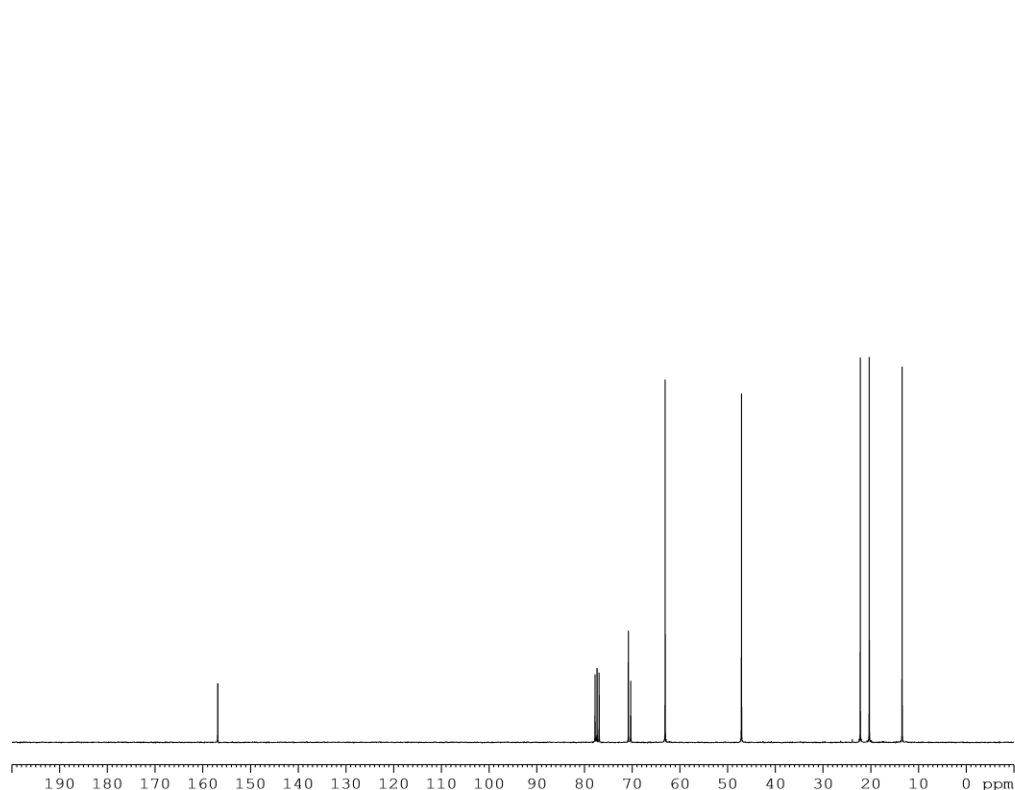

```
Current Data Parameters
NAME      FC12GE029B
EXPNO     10
PROCNO    1

F2 - Acquisition Parameters
Date_     20110326
Time      13.50
INSTRUM   spect
PROBHD    5 mm BBI 1H-BB
PULPROG   zgpg30
TD         65536
SOLVENT   CDCl3
NS         2048
DS         4
SWH        17985.611 Hz
FIDRES     0.274439 Hz
AQ         1.8219508 sec
RG         1625.5
DW         27.800 usec
DE         10.00 usec
TE         293.8 K
D1         2.00000000 sec
d11        0.03000000 sec
DELTA     1.89999998 sec
MCREST    0.00000000 sec
MCWRK     0.01500000 sec

===== CHANNEL f1 =====
NUC1       13C
P1         9.00 usec
PL1        -6.00 dB
SFO1       75.4752953 MHz

===== CHANNEL f2 =====
CPDPRG2   waltz16
NUC2       1H
PCPD2     80.00 usec
PL2        0.00 dB
PL12       22.00 dB
PL13       22.00 dB
SFO2       300.1312005 MHz

F2 - Processing parameters
SI         32768
SF         75.4677430 MHz
WDW        EM
SSB        0
LB         1.00 Hz
GB         0
PC         1.40
```

Click-Alkynylation of N- and P- Nucleophiles by Oxidative Cross-Coupling with Alkynylcopper Reagents

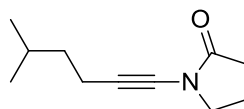

11a

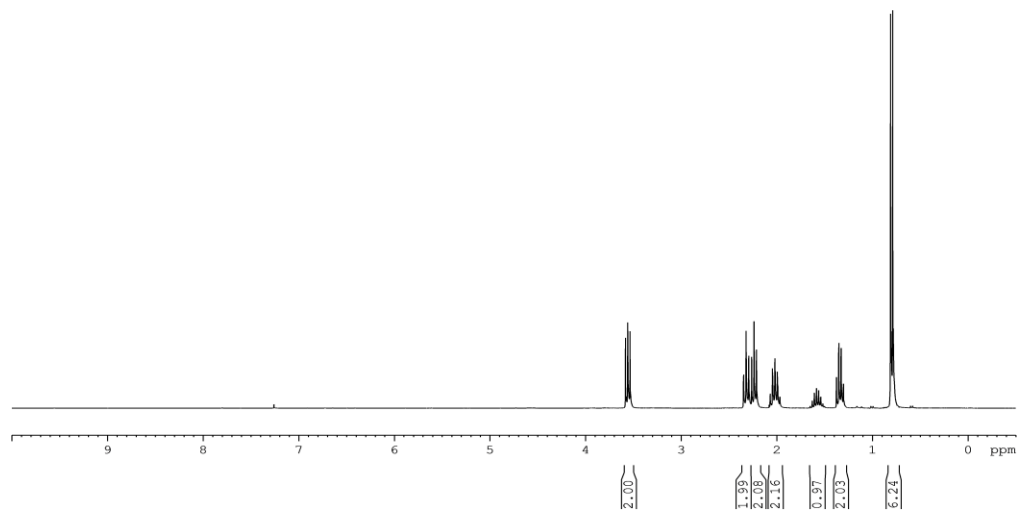

```
Current Data Parameters
NAME      fcl4ge030c
EXPNO     12
PROCNO    1

F2 - Acquisition Parameters
Date_     20110408
Time      9.21
INSTRUM   spect
PROBHD    5 mm BBI 1H-BB
PULPROG   zg30
TD         32768
SOLVENT   CDCl3
NS         16
DS         0
SWH        6313.131 Hz
FIDRES     0.192661 Hz
AQ         2.5952756 sec
RG         40.3
DW         79.200 usec
DE         6.50 usec
TE         294.1 K
D1         1.00000000 sec
MCREST     0.00000000 sec
MCWRK     0.01500000 sec

===== CHANNEL f1 =====
NUC1       1H
P1         6.20 usec
PL1        0.00 dB
SFO1       300.1328512 MHz

F2 - Processing parameters
SI         32768
SF         300.1300063 MHz
WDW        EM
SSB        0
LB         0.10 Hz
GB         0
PC         1.00
```

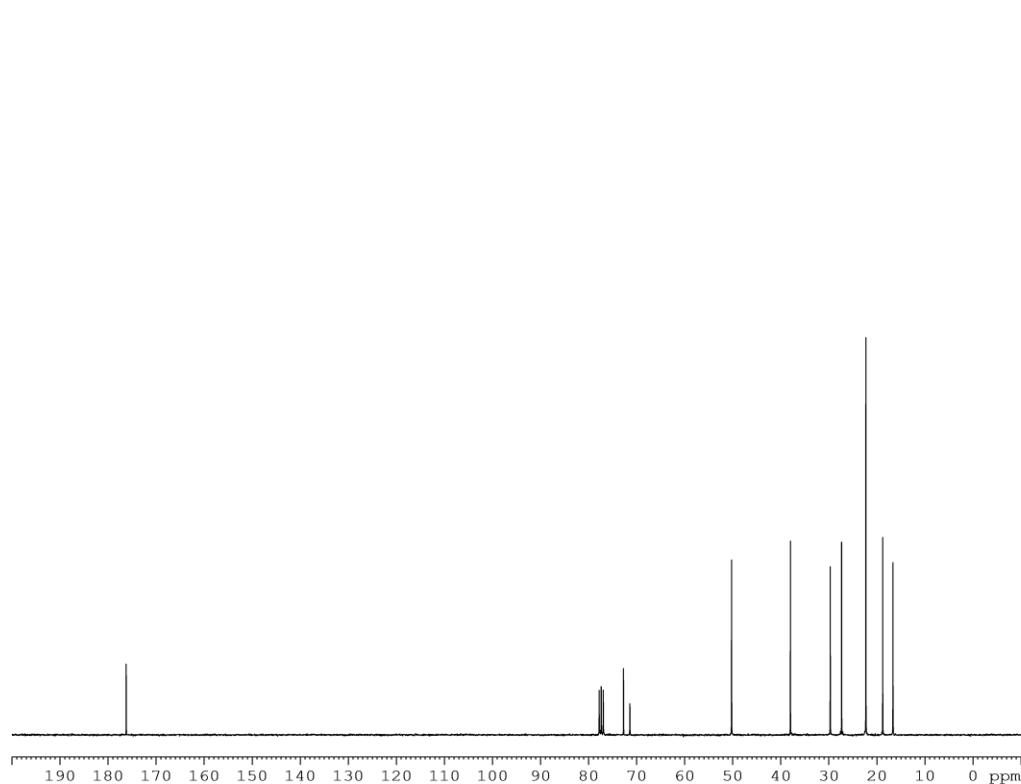

```
Current Data Parameters
NAME      fcl4ge030c
EXPNO     10
PROCNO    1

F2 - Acquisition Parameters
Date_     20110408
Time      9.02
INSTRUM   spect
PROBHD    5 mm BBI 1H-BB
PULPROG   zgpg30
TD         65536
SOLVENT   CDCl3
NS         1024
DS         4
SWH        17985.611 Hz
FIDRES     0.274439 Hz
AQ         1.8219508 sec
RG         1625.5
DW         27.800 usec
DE         10.00 usec
TE         294.2 K
D1         2.00000000 sec
d11        0.03000000 sec
DELTA      1.89999998 sec
MCREST     0.00000000 sec
MCWRK     0.01500000 sec

===== CHANNEL f1 =====
NUC1       13C
P1         9.00 usec
PL1        -6.00 dB
SFO1       75.4752953 MHz

===== CHANNEL f2 =====
CPDPRG2   waltz16
NUC2       1H
PCPD2      80.00 usec
PL2        0.00 dB
PL12       22.00 dB
PL13       22.00 dB
SFO2       300.1312005 MHz

F2 - Processing parameters
SI         32768
SF         75.4677347 MHz
WDW        EM
SSB        0
LB         1.00 Hz
GB         0
PC         1.40
```

Click-Alkynylation of N- and P- Nucleophiles by Oxidative Cross-Coupling with Alkynylcopper Reagents

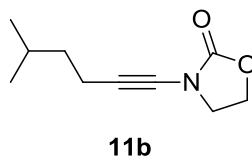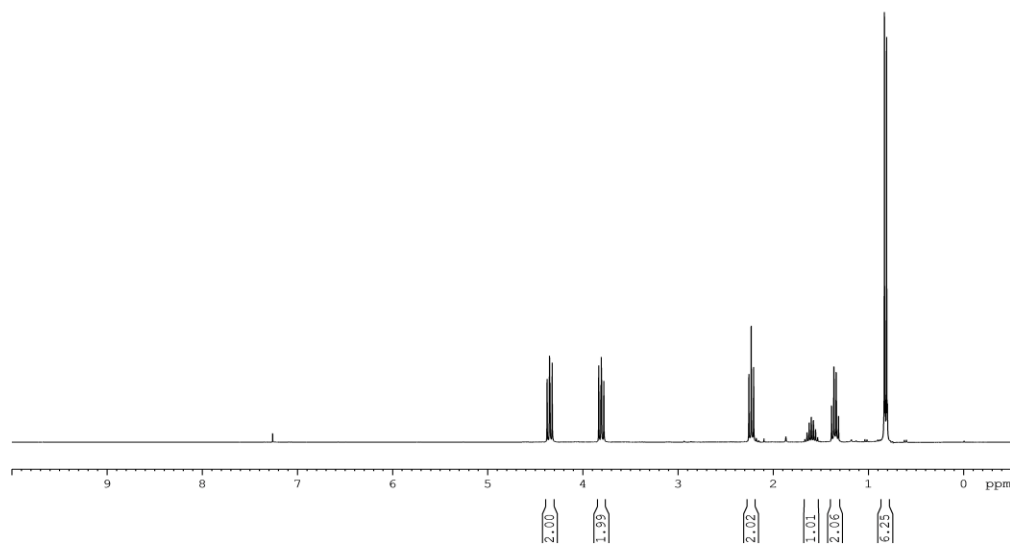

```
Current Data Parameters
NAME      fcl3ge29d
EXPNO     22
PROCNO    1

F2 - Acquisition Parameters
Date_     20110330
Time      6.12
INSTRUM   spect
PROBHD    5 mm BBI 1H-BB
PULPROG   zg30
TD         32768
SOLVENT   CDC13
NS         16
DS         0
SWH        6313.131 Hz
FIDRES     0.192661 Hz
AQ         2.5952756 sec
RG         40.3
DW         79.200 usec
DE         6.50 usec
TE         293.5 K
D1         1.00000000 sec
MCREST     0.00000000 sec
MCWRK     0.01500000 sec

===== CHANNEL f1 =====
NUC1       1H
P1         6.20 usec
PL1        0.00 dB
SFO1       300.1328512 MHz

F2 - Processing parameters
SI         32768
SF         300.1300059 MHz
WDW        EM
SSB        0
LB         0.10 Hz
GB         0
PC         1.00
```

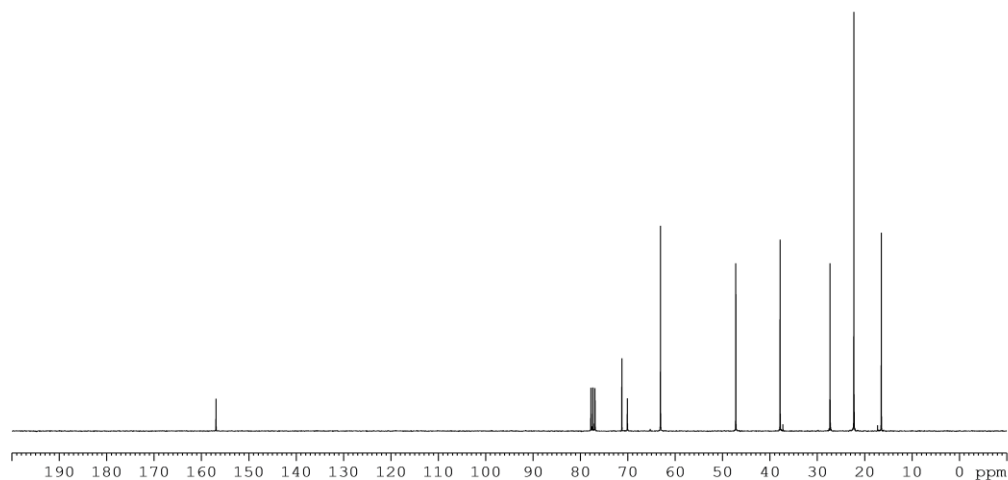

```
Current Data Parameters
NAME      fcl3ge29d
EXPNO     20
PROCNO    1

F2 - Acquisition Parameters
Date_     20110330
Time      5.54
INSTRUM   spect
PROBHD    5 mm BBI 1H-BB
PULPROG   zgpg30
TD         65536
SOLVENT   CDC13
NS         2000
DS         4
SWH        17985.611 Hz
FIDRES     0.274439 Hz
AQ         1.8219508 sec
RG         1625.5
DW         27.800 usec
DE         10.00 usec
TE         293.6 K
D1         2.00000000 sec
d11        0.03000000 sec
DELTA     1.89999998 sec
MCREST     0.00000000 sec
MCWRK     0.01500000 sec

===== CHANNEL f1 =====
NUC1       13C
P1         9.00 usec
PL1        -6.00 dB
SFO1       75.4752953 MHz

===== CHANNEL f2 =====
CPDPRG2   waltz16
NUC2       1H
PCPD2     80.00 usec
PL2        0.00 dB
PL12       22.00 dB
PL13       22.00 dB
SFO2       300.1312005 MHz

F2 - Processing parameters
SI         32768
SF         75.4677353 MHz
WDW        EM
SSB        0
LB         1.00 Hz
GB         0
PC         1.40
```



Click-Alkynylation of N- and P- Nucleophiles by Oxidative Cross-Coupling with Alkynylcopper Reagents

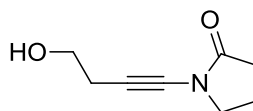

12a

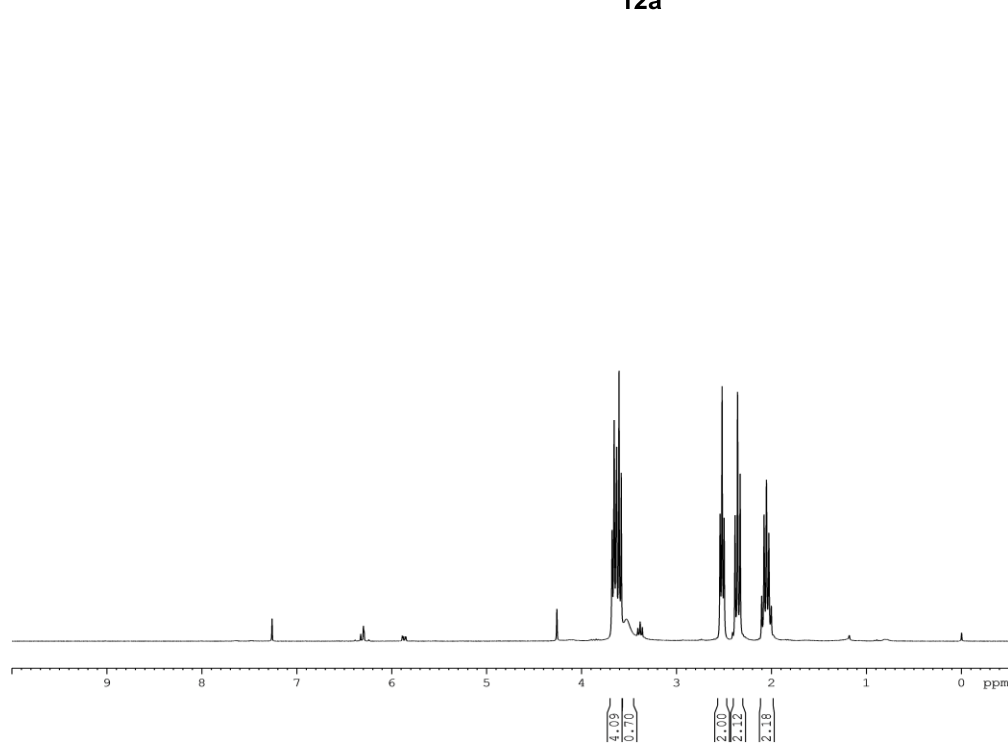

```
Current Data Parameters
NAME      FC21GE030I
EXPNO     10
PROCNO    1

F2 - Acquisition Parameters
Date_     20110525
Time      18.37
INSTRUM   spect
PROBHD    5 mm BBI 1H-BB
PULPROG   zg30
TD         32768
SOLVENT   CDCl3
NS         16
DS         0
SWH        6313.131 Hz
FIDRES     0.192661 Hz
AQ         2.5952756 sec
RG         64
DW         79.200 usec
DE         6.50 usec
TE         294.0 K
D1         1.00000000 sec
MCREST     0.00000000 sec
MCWRK     0.01500000 sec

===== CHANNEL f1 =====
NUC1       1H
P1         6.20 usec
PL1        0.00 dB
SFO1       300.1328512 MHz

F2 - Processing parameters
SI         32768
SF         300.1300057 MHz
WDW        EM
SSB        0
LB         0.10 Hz
GB         0
PC         1.00
```

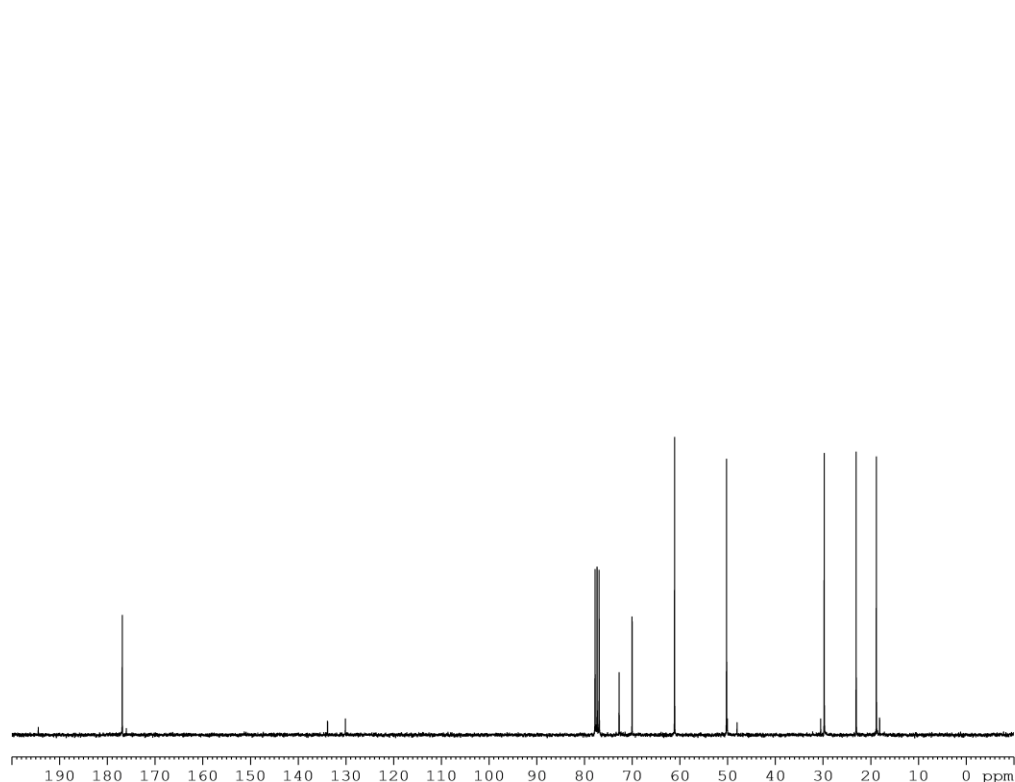

```
Current Data Parameters
NAME      FC21GE030I
EXPNO     11
PROCNO    1

F2 - Acquisition Parameters
Date_     20110525
Time      19.46
INSTRUM   spect
PROBHD    5 mm BBI 1H-BB
PULPROG   zgpg30
TD         65536
SOLVENT   CDCl3
NS         1024
DS         4
SWH        17985.611 Hz
FIDRES     0.274439 Hz
AQ         1.8219508 sec
RG         1625.5
DW         27.800 usec
DE         10.00 usec
TE         294.3 K
D1         2.00000000 sec
d11        0.03000000 sec
DELTA      1.89999998 sec
MCREST     0.00000000 sec
MCWRK     0.01500000 sec

===== CHANNEL f1 =====
NUC1       13C
P1         9.00 usec
PL1        -6.00 dB
SFO1       75.4752953 MHz

===== CHANNEL f2 =====
CPDPRG2   waltz16
NUC2       1H
PCPD2     80.00 usec
PL2        0.00 dB
PL12       22.00 dB
PL13       22.00 dB
SFO2       300.1312005 MHz

F2 - Processing parameters
SI         32768
SF         75.4677336 MHz
WDW        EM
SSB        0
LB         1.00 Hz
GB         0
PC         1.40
```

Click-Alkynylation of N- and P- Nucleophiles by Oxidative Cross-Coupling with Alkynylcopper Reagents

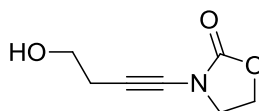

12b

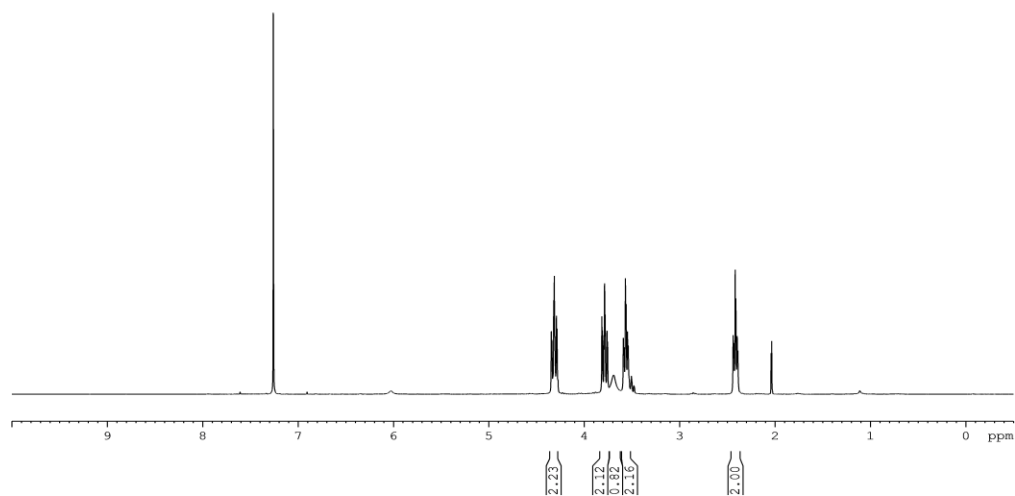

```
Current Data Parameters
NAME      FC16JH43C
EXPNO     10
PROCNO    1

F2 - Acquisition Parameters
Date_     20110424
Time      1.52
INSTRUM   spect
PROBHD    5 mm BBI 1H-BB
PULPROG   zg30
TD         32768
SOLVENT   CDCl3
NS         16
DS         0
SWH        6313.131 Hz
FIDRES     0.192661 Hz
AQ         2.5952756 sec
RG         35.9
DW         79.200 usec
DE         6.50 usec
TE         294.3 K
D1         1.00000000 sec
MCREST     0.00000000 sec
MCWRK     0.01500000 sec

===== CHANNEL f1 =====
NUC1       1H
P1         6.20 usec
PL1        0.00 dB
SFO1       300.1328512 MHz

F2 - Processing parameters
SI         32768
SF         300.1300059 MHz
WDW        EM
SSB        0
LB         0.10 Hz
GB         0
PC         1.00
```

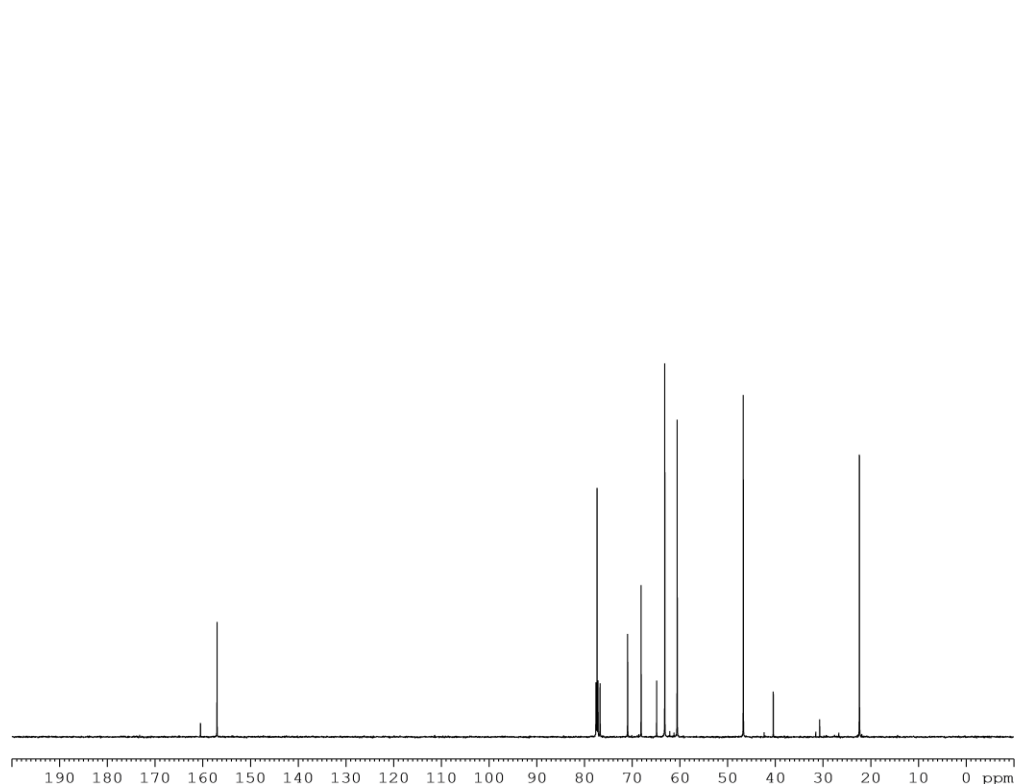

```
Current Data Parameters
NAME      FC16JH43C
EXPNO     11
PROCNO    1

F2 - Acquisition Parameters
Date_     20110424
Time      3.00
INSTRUM   spect
PROBHD    5 mm BBI 1H-BB
PULPROG   zgpg30
TD         65536
SOLVENT   CDCl3
NS         1024
DS         4
SWH        17985.611 Hz
FIDRES     0.274439 Hz
AQ         1.8219508 sec
RG         1625.5
DW         27.800 usec
DE         10.00 usec
TE         294.4 K
D1         2.00000000 sec
d11        0.03000000 sec
DELTA      1.89999998 sec
MCREST     0.00000000 sec
MCWRK     0.01500000 sec

===== CHANNEL f1 =====
NUC1       13C
P1         9.00 usec
PL1        -6.00 dB
SFO1       75.4752953 MHz

===== CHANNEL f2 =====
CPDPRG2   waltz16
NUC2       1H
PCPD2      80.00 usec
PL2        0.00 dB
PL12       22.00 dB
PL13       22.00 dB
SFO2       300.1312005 MHz

F2 - Processing parameters
SI         32768
SF         75.4677616 MHz
WDW        EM
SSB        0
LB         1.00 Hz
GB         0
PC         1.40
```

Click-Alkynylation of N- and P- Nucleophiles by Oxidative Cross-Coupling with Alkynylcopper Reagents

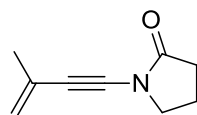

13a

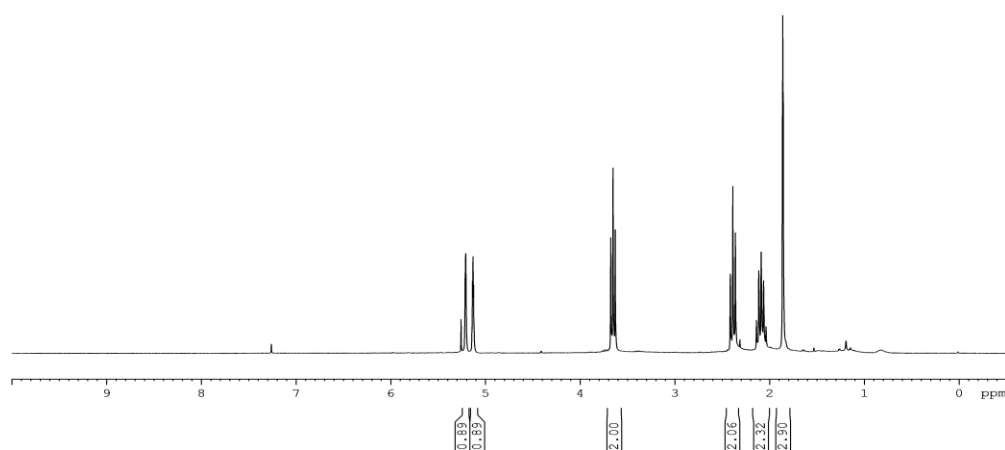

Current Data Parameters  
NAME fcl4ge030d  
EXPNO 20  
PROCNO 1

F2 - Acquisition Parameters  
Date\_ 20110411  
Time 12.38  
INSTRUM spect  
PROBHD 5 mm BBI 1H-BB  
PULPROG zg30  
TD 32768  
SOLVENT CDCl3  
NS 16  
DS 0  
SWH 6313.131 Hz  
FIDRES 0.192661 Hz  
AQ 2.5952756 sec  
RG 80.6  
DW 79.200 usec  
DE 6.50 usec  
TE 294.1 K  
D1 1.00000000 sec  
MCREST 0.00000000 sec  
MCWRK 0.01500000 sec

===== CHANNEL f1 =====  
NUC1 1H  
P1 6.20 usec  
PL1 0.00 dB  
SFO1 300.1328512 MHz

F2 - Processing parameters  
SI 32768  
SF 300.1300057 MHz  
WDW EM  
SSB 0  
LB 0.10 Hz  
GB 0  
PC 1.00

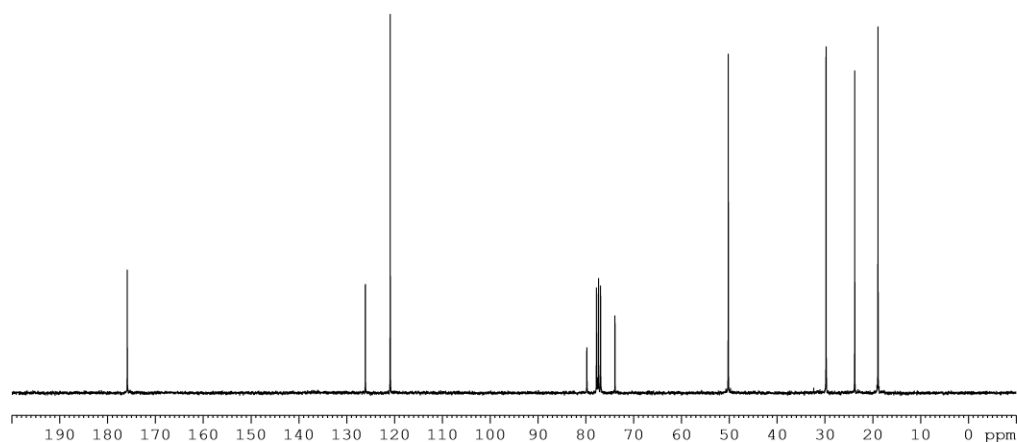

Current Data Parameters  
NAME fcl4ge030d  
EXPNO 10  
PROCNO 1

F2 - Acquisition Parameters  
Date\_ 20110408  
Time 13.33  
INSTRUM spect  
PROBHD 5 mm BBI 1H-BB  
PULPROG zgpg30  
TD 65536  
SOLVENT CDCl3  
NS 1500  
DS 4  
SWH 17985.611 Hz  
FIDRES 0.274439 Hz  
AQ 1.8219508 sec  
RG 1625.5  
DW 27.800 usec  
DE 10.00 usec  
TE 294.4 K  
D1 2.00000000 sec  
d11 0.03000000 sec  
DELTA 1.89999998 sec  
MCREST 0.00000000 sec  
MCWRK 0.01500000 sec

===== CHANNEL f1 =====  
NUC1 13C  
P1 9.00 usec  
PL1 -6.00 dB  
SFO1 75.4752953 MHz

===== CHANNEL f2 =====  
CPDPRG2 waltz16  
NUC2 1H  
PCPD2 80.00 usec  
PL2 0.00 dB  
PL12 22.00 dB  
PL13 22.00 dB  
SFO2 300.1312005 MHz

F2 - Processing parameters  
SI 32768  
SF 75.4677364 MHz  
WDW EM  
SSB 0  
LB 1.00 Hz  
GB 0  
PC 1.40

Click-Alkynylation of N- and P- Nucleophiles by Oxidative Cross-Coupling with Alkynylcopper Reagents

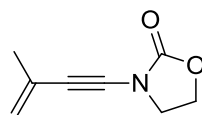

13b

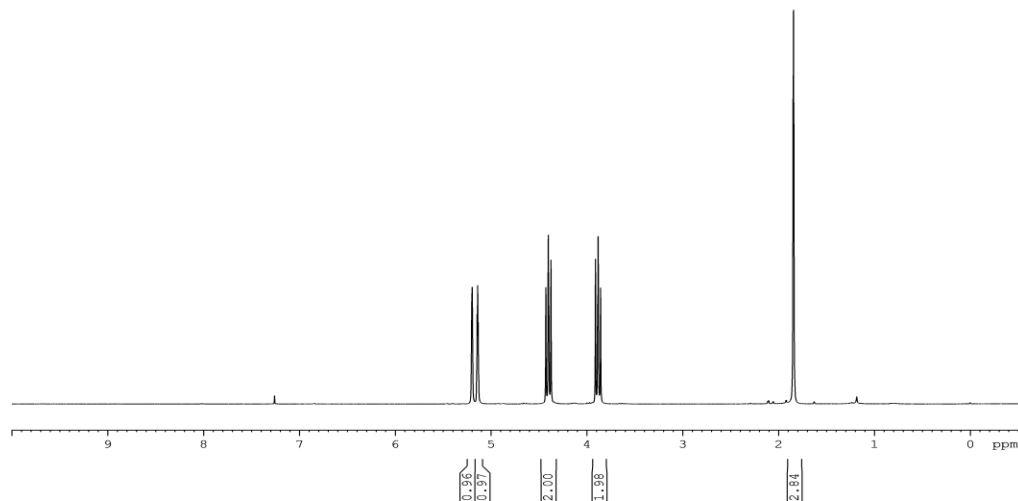

```
Current Data Parameters
NAME      FC16JH43A
EXPNO     10
PROCNO    1

F2 - Acquisition Parameters
Date_     20110424
Time      5.39
INSTRUM   spect
PROBHD    5 mm BBI 1H-BB
PULPROG   zg30
TD        32768
SOLVENT   CDCl3
NS         16
DS         0
SWH        6313.131 Hz
FIDRES     0.192661 Hz
AQ         2.5952756 sec
RG         57
DW         79.200 usec
DE         6.50 usec
TE         294.1 K
D1         1.00000000 sec
MCREST     0.00000000 sec
MCWRK     0.01500000 sec

===== CHANNEL f1 =====
NUC1      1H
P1         6.20 usec
PL1        0.00 dB
SFO1      300.1328512 MHz

F2 - Processing parameters
SI         32768
SF         300.1300059 MHz
WDW        EM
SSB        0
LB         0.10 Hz
GB         0
PC         1.00
```

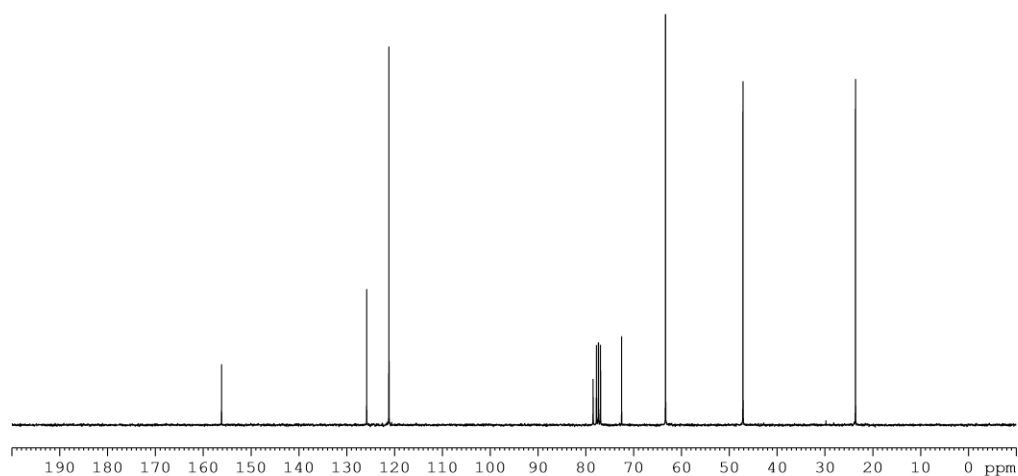

```
Current Data Parameters
NAME      FC16JH43A
EXPNO     11
PROCNO    1

F2 - Acquisition Parameters
Date_     20110424
Time      6.48
INSTRUM   spect
PROBHD    5 mm BBI 1H-BB
PULPROG   zgpg30
TD        65536
SOLVENT   CDCl3
NS         1024
DS         4
SWH        17985.611 Hz
FIDRES     0.274439 Hz
AQ         1.8219508 sec
RG         1448.2
DW         27.800 usec
DE         10.00 usec
TE         294.3 K
D1         2.00000000 sec
d11        0.03000000 sec
DELTA     1.89999998 sec
MCREST     0.00000000 sec
MCWRK     0.01500000 sec

===== CHANNEL f1 =====
NUC1      13C
P1         9.00 usec
PL1        -6.00 dB
SFO1      75.4752953 MHz

===== CHANNEL f2 =====
CPDPRG2   waltz16
NUC2       1H
PCPD2      80.00 usec
PL2         0.00 dB
PL12       22.00 dB
PL13       22.00 dB
SFO2      300.1312005 MHz

F2 - Processing parameters
SI         32768
SF         75.4677364 MHz
WDW        EM
SSB        0
LB         1.00 Hz
GB         0
PC         1.40
```

Click-Alkynylation of N- and P- Nucleophiles by Oxidative Cross-Coupling with Alkynylcopper Reagents

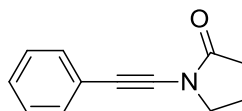

14a

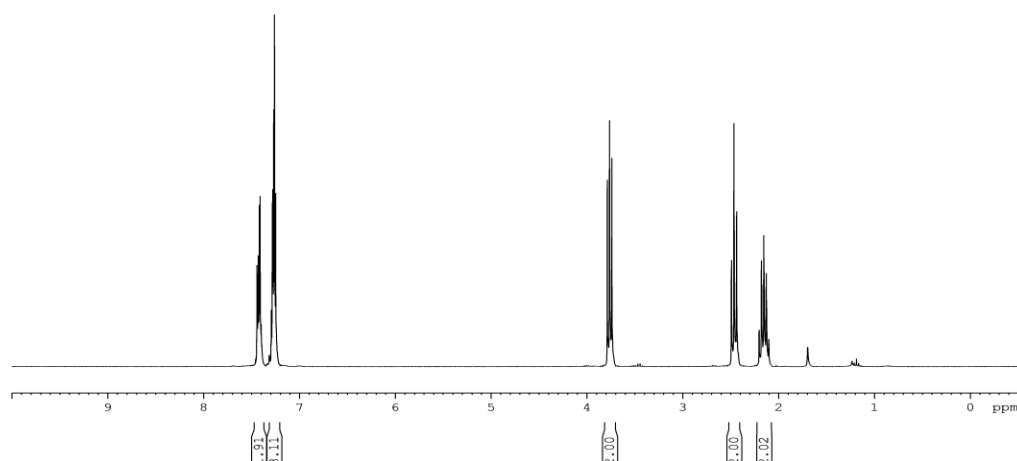

```
Current Data Parameters
NAME      fcl4ge030a
EXPNO     12
PROCNO    1

F2 - Acquisition Parameters
Date_     20110408
Time      6.07
INSTRUM   spect
PROBHD    5 mm BBI 1H-BB
PULPROG   zg30
TD        32768
SOLVENT   CDCl3
NS        16
DS        0
SWH       6313.131 Hz
FIDRES    0.192661 Hz
AQ        2.5952756 sec
RG        287.4
DW        79.200 usec
DE        6.50 usec
TE        294.1 K
D1        1.00000000 sec
MCREST    0.00000000 sec
MCWRK     0.01500000 sec

===== CHANNEL f1 =====
NUC1      1H
P1        6.20 usec
PL1       0.00 dB
SFO1      300.1328512 MHz

F2 - Processing parameters
SI        32768
SF        300.1300097 MHz
WDW       EM
SSB       0
LB        0.10 Hz
GB        0
PC        1.00
```

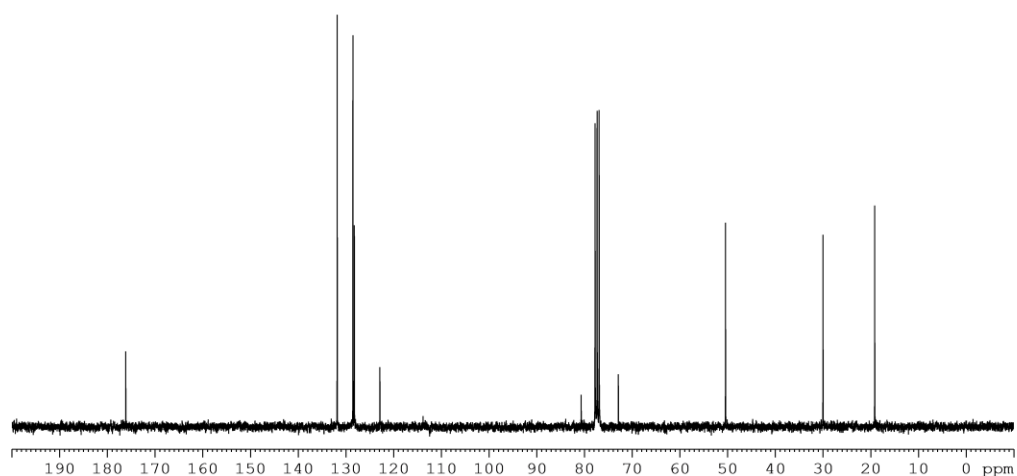

```
Current Data Parameters
NAME      fcl4ge030a
EXPNO     10
PROCNO    1

F2 - Acquisition Parameters
Date_     20110408
Time      5.48
INSTRUM   spect
PROBHD    5 mm BBI 1H-BB
PULPROG   zgpg30
TD        65536
SOLVENT   CDCl3
NS        1024
DS        4
SWH       17985.611 Hz
FIDRES    0.274439 Hz
AQ        1.8219508 sec
RG        1625.5
DW        27.000 usec
DE        10.00 usec
TE        294.3 K
D1        2.00000000 sec
d11       0.03000000 sec
DELTA     1.89999998 sec
MCREST    0.00000000 sec
MCWRK     0.01500000 sec

===== CHANNEL f1 =====
NUC1      13C
P1        9.00 usec
PL1       -6.00 dB
SFO1      75.4752953 MHz

===== CHANNEL f2 =====
CPDPRG2   waltz16
NUC2      1H
PCPD2     80.00 usec
PL2       0.00 dB
PL12      22.00 dB
PL13      22.00 dB
SFO2      300.1312005 MHz

F2 - Processing parameters
SI        32768
SF        75.4677271 MHz
WDW       EM
SSB       0
LB        1.00 Hz
GB        0
PC        1.40
```

Click-Alkynylation of N- and P- Nucleophiles by Oxidative Cross-Coupling with Alkynylcopper Reagents

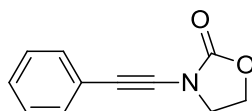

14b

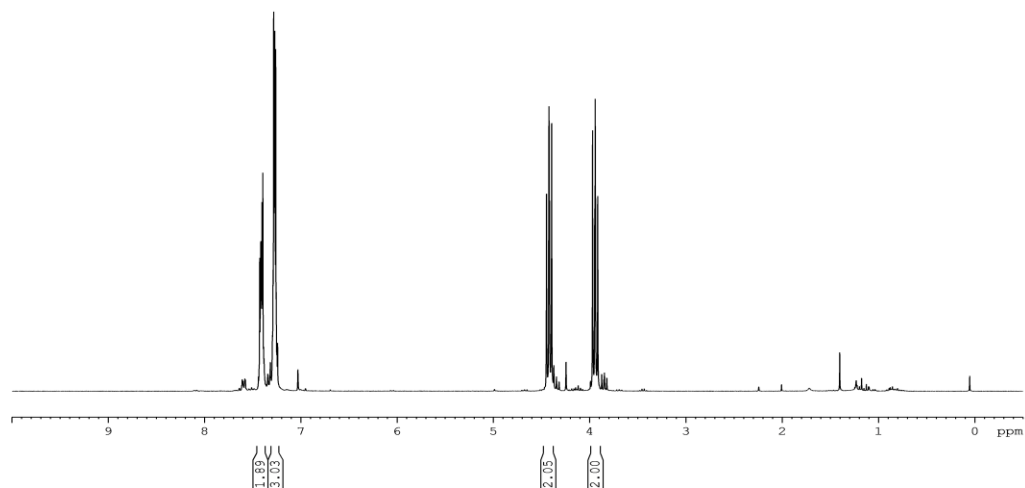

```
Current Data Parameters
NAME      fc26g020PhOxa
EXPNO     1
PROCNO    1

F2 - Acquisition Parameters
Date_     20090625
Time      16.57
INSTRUM   spect
PROBHD    5 mm QNP 1H/13
PULPROG   zg30
TD         32768
SOLVENT   CDCl3
NS         16
DS         0
SWH        6313.131 Hz
FIDRES     0.192661 Hz
AQ         2.5952756 sec
RG         228.1
DW         79.200 usec
DE         6.50 usec
TE         296.2 K
D1         1.00000000 sec
MCREST     0.00000000 sec
MCWRK     0.01500000 sec

===== CHANNEL f1 =====
NUC1       1H
P1         6.70 usec
PL1        -6.00 dB
SFO1       300.1328512 MHz

F2 - Processing parameters
SI         32768
SF         300.1300211 MHz
WDW        EM
SSB        0
LB         0.10 Hz
GB         0
PC         1.00
```

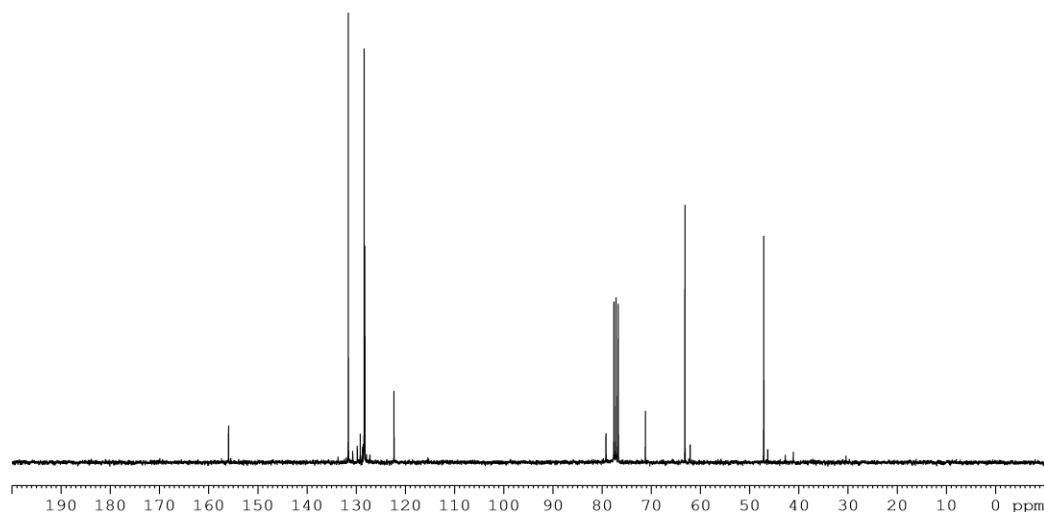

```
Current Data Parameters
NAME      fc26g020PhOxa
EXPNO     2
PROCNO    1

F2 - Acquisition Parameters
Date_     20090625
Time      17.16
INSTRUM   spect
PROBHD    5 mm QNP 1H/13
PULPROG   zgpg30
TD         65536
SOLVENT   CDCl3
NS         382
DS         4
SWH        17985.611 Hz
FIDRES     0.274439 Hz
AQ         1.8219508 sec
RG         16384
DW         27.800 usec
DE         10.00 usec
TE         296.1 K
D1         2.00000000 sec
d11        0.03000000 sec
DELTA      1.89999998 sec
MCREST     0.00000000 sec
MCWRK     0.01500000 sec

===== CHANNEL f1 =====
NUC1       13C
P1         5.70 usec
PL1        -6.00 dB
SFO1       75.4752953 MHz

===== CHANNEL f2 =====
CPDPRG2   waltz16
NUC2       1H
PCPD2     80.00 usec
PL2        -6.00 dB
PL12       15.80 dB
PL13       15.80 dB
SFO2       300.1312005 MHz

F2 - Processing parameters
SI         32768
SF         75.4677490 MHz
WDW        EM
SSB        0
LB         1.00 Hz
GB         0
PC         1.40
```

Click-Alkynylation of N- and P- Nucleophiles by Oxidative Cross-Coupling with Alkynylcopper Reagents

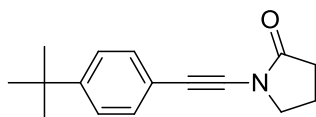

15a

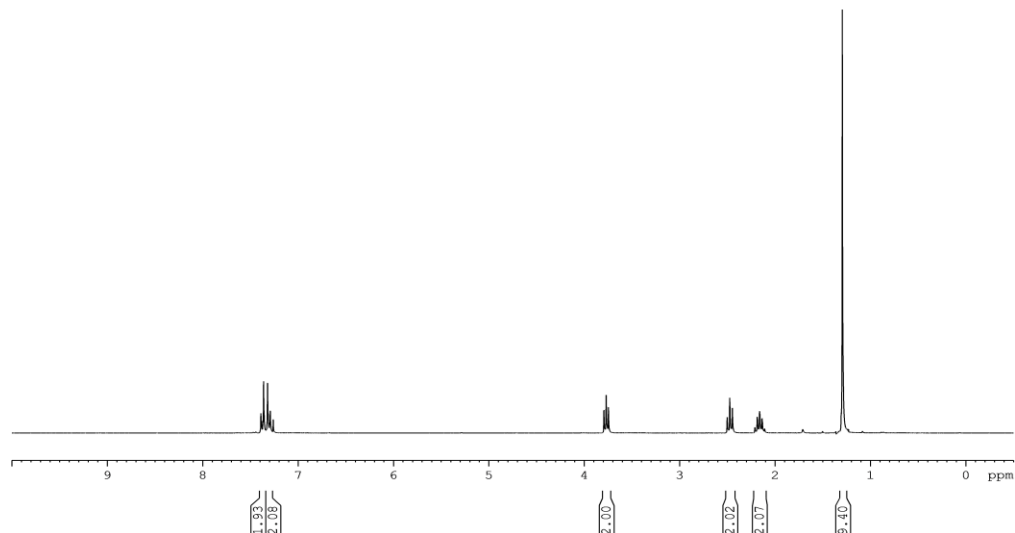

```
Current Data Parameters
NAME      FC15GE030f
EXPNO     10
PROCNO    1

F2 - Acquisition Parameters
Date_     20110412
Time      5.24
INSTRUM   spect
PROBHD    5 mm BBI 1H-BB
PULPROG   zg30
TD        32768
SOLVENT   CDCl3
NS        16
DS        0
SWH        6313.131 Hz
FIDRES     0.192661 Hz
AQ        2.5952756 sec
RG         181
DW        79.200 usec
DE         6.50 usec
TE        293.7 K
D1         1.00000000 sec
MCREST     0.00000000 sec
MCWRK     0.01500000 sec

===== CHANNEL f1 =====
NUC1       1H
P1         6.20 usec
PL1        0.00 dB
SFO1       300.1328512 MHz

F2 - Processing parameters
SI         32768
SF         300.1300061 MHz
WDW        EM
SSB        0
LB         0.10 Hz
GB         0
PC         1.00
```

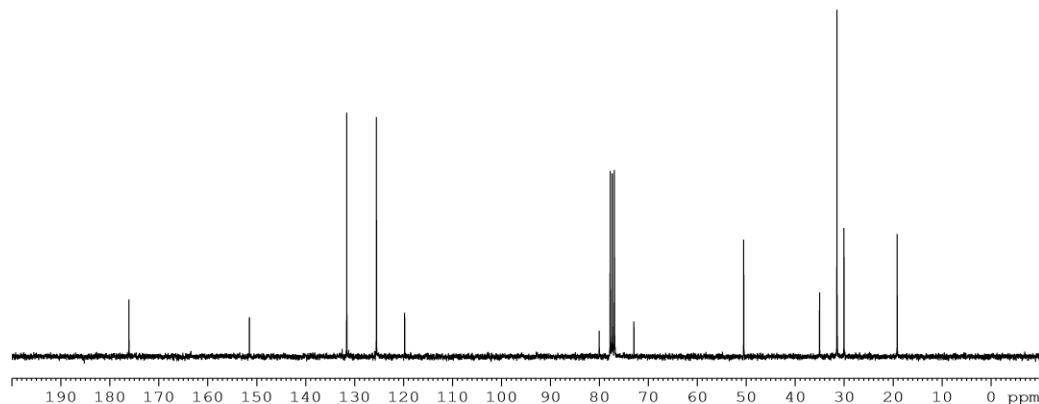

```
Current Data Parameters
NAME      FC15GE030f
EXPNO     20
PROCNO    1

F2 - Acquisition Parameters
Date_     20110412
Time      6.32
INSTRUM   spect
PROBHD    5 mm BBI 1H-BB
PULPROG   zgpg30
TD        65536
SOLVENT   CDCl3
NS        1024
DS        4
SWH        17985.611 Hz
FIDRES     0.274439 Hz
AQ        1.8219508 sec
RG         1625.5
DW        27.800 usec
DE        10.00 usec
TE        293.8 K
D1         2.00000000 sec
d11        0.03000000 sec
DELTA      1.89999998 sec
MCREST     0.00000000 sec
MCWRK     0.01500000 sec

===== CHANNEL f1 =====
NUC1       13C
P1         9.00 usec
PL1        -6.00 dB
SFO1       75.4752953 MHz

===== CHANNEL f2 =====
CPDPRG2   waltz16
NUC2       1H
PCPD2     80.00 usec
PL2        0.00 dB
PL12       22.00 dB
PL13       22.00 dB
SFO2       300.1312005 MHz

F2 - Processing parameters
SI         32768
SF         75.4677260 MHz
WDW        EM
SSB        0
LB         1.00 Hz
GB         0
PC         1.40
```

Click-Alkynylation of N- and P- Nucleophiles by Oxidative Cross-Coupling with Alkynylcopper Reagents

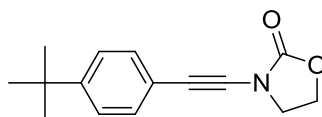

**15b**

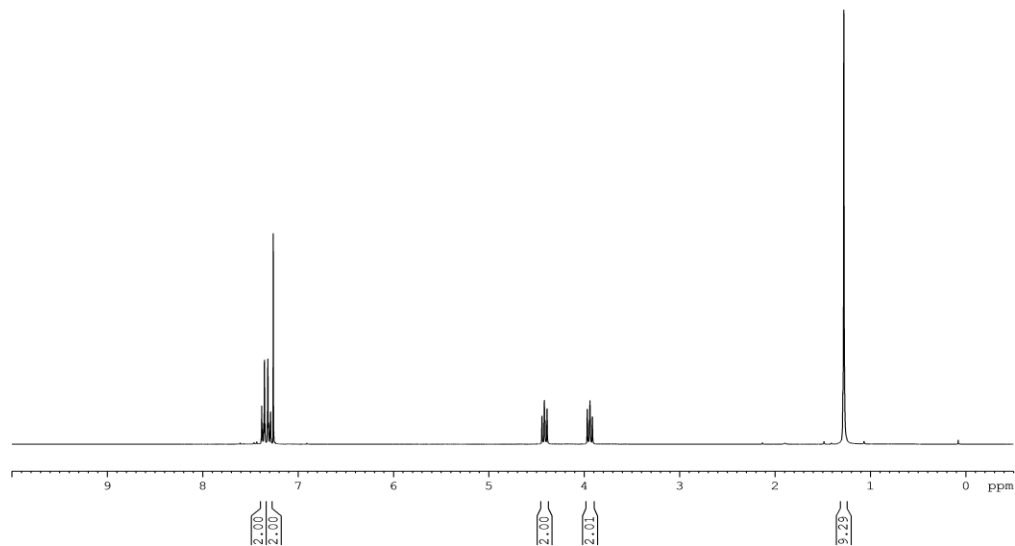

```
Current Data Parameters
NAME      FC16JH43B
EXPNO     10
PROCNO    1

F2 - Acquisition Parameters
Date_     20110424
Time      3.45
INSTRUM   spect
PROBHD    5 mm BBI 1H-BB
PULPROG   zg30
TD         32768
SOLVENT   CDCl3
NS         16
DS         0
SWH        6313.131 Hz
FIDRES     0.192661 Hz
AQ         2.5952756 sec
RG         35.9
DW         79.200 usec
DE         6.50 usec
TE         294.2 K
D1         1.00000000 sec
MCREST    0.00000000 sec
MCWRK     0.01500000 sec

===== CHANNEL f1 =====
NUC1       1H
P1         6.20 usec
PL1        0.00 dB
SFO1       300.1328512 MHz

F2 - Processing parameters
SI         32768
SF         300.1300057 MHz
WDW        EM
SSB        0
LB         0.10 Hz
GB         0
PC         1.00
```

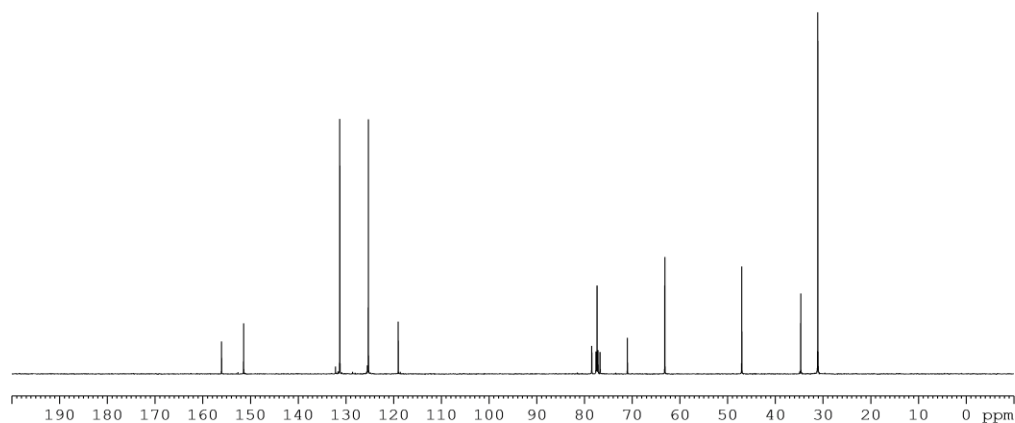

```
Current Data Parameters
NAME      FC16JH43B
EXPNO     11
PROCNO    1

F2 - Acquisition Parameters
Date_     20110424
Time      4.52
INSTRUM   spect
PROBHD    5 mm BBI 1H-BB
PULPROG   zgpg30
TD         65536
SOLVENT   CDCl3
NS         1024
DS         4
SWH        17985.611 Hz
FIDRES     0.274439 Hz
AQ         1.8219508 sec
RG         1625.5
DW         27.800 usec
DE         10.00 usec
TE         294.4 K
D1         2.00000000 sec
d11        0.03000000 sec
DELTA     1.89999998 sec
MCREST    0.00000000 sec
MCWRK     0.01500000 sec

===== CHANNEL f1 =====
NUC1       13C
P1         9.00 usec
PL1        -6.00 dB
SFO1       75.4752953 MHz

===== CHANNEL f2 =====
CPDPRG2   waltz16
NUC2       1H
PCPD2     80.00 usec
PL2        0.00 dB
PL12       22.00 dB
PL13       22.00 dB
SFO2       300.1312005 MHz

F2 - Processing parameters
SI         32768
SF         75.4677539 MHz
WDW        EM
SSB        0
LB         1.00 Hz
GB         0
PC         1.40
```



Click-Alkynylation of N- and P- Nucleophiles by Oxidative Cross-Coupling with Alkynylcopper Reagents

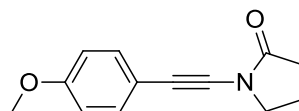

16a

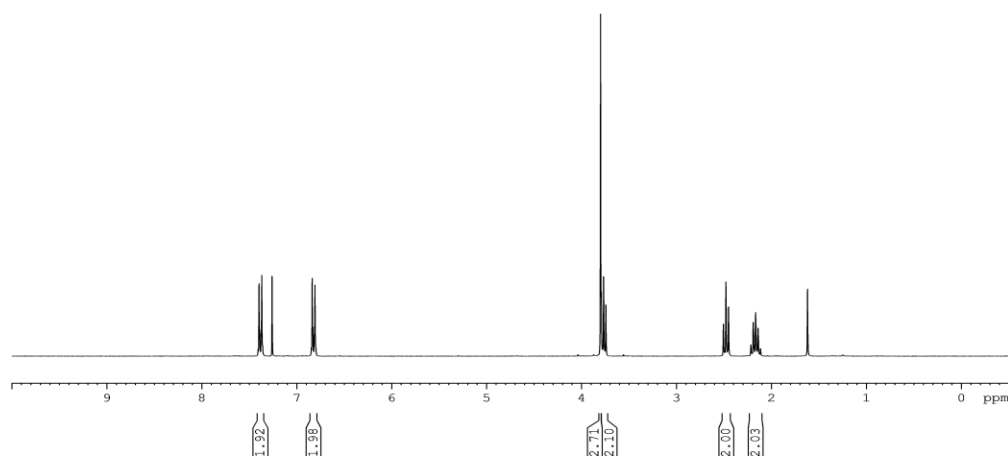

```
Current Data Parameters
NAME      fc28ge030g
EXPNO     30
PROCNO    1

F2 - Acquisition Parameters
Date_     20110714
Time      5.29
INSTRUM   spect
PROBHD    5 mm BBI 1H-BB
PULPROG   zg30
TD        32768
SOLVENT   CDCl3
NS         16
DS         0
SWH        6313.131 Hz
FIDRES     0.192661 Hz
AQ         2.5952756 sec
RG         645.1
DW         79.200 usec
DE         6.50 usec
TE         294.4 K
D1         1.00000000 sec
MCREST     0.00000000 sec
MCWRK     0.01500000 sec

===== CHANNEL f1 =====
NUC1       1H
P1         6.20 usec
PL1        0.00 dB
SFO1       300.1328512 MHz

F2 - Processing parameters
SI         32768
SF         300.1300061 MHz
WDW        EM
SSB        0
LB         0.10 Hz
GB         0
PC         1.00
```

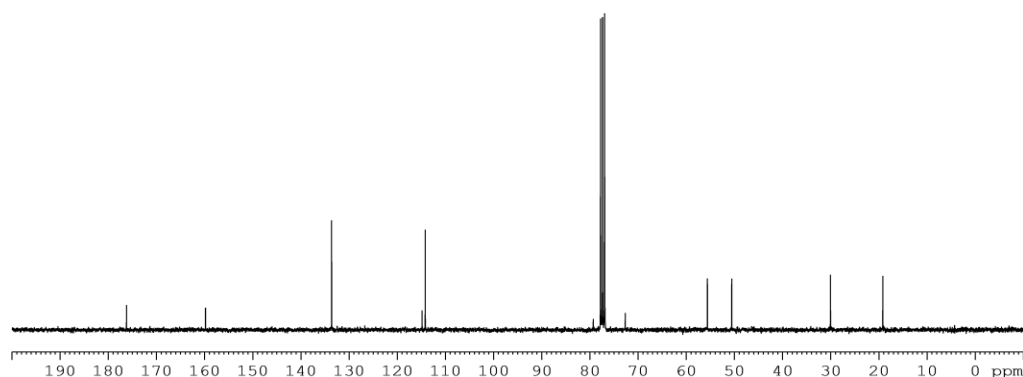

```
Current Data Parameters
NAME      fc28ge030g
EXPNO     10
PROCNO    1

F2 - Acquisition Parameters
Date_     20110714
Time      5.10
INSTRUM   spect
PROBHD    5 mm BBI 1H-BB
PULPROG   zgpg30
TD        65536
SOLVENT   CDCl3
NS         2048
DS         4
SWH        17985.611 Hz
FIDRES     0.274439 Hz
AQ         1.8219508 sec
RG         1824.6
DW         27.800 usec
DE         10.00 usec
TE         294.5 K
D1         2.00000000 sec
d11        0.03000000 sec
DELTA      1.89999998 sec
MCREST     0.00000000 sec
MCWRK     0.01500000 sec

===== CHANNEL f1 =====
NUC1       13C
P1         9.00 usec
PL1        -6.00 dB
SFO1       75.4752953 MHz

===== CHANNEL f2 =====
CPDPRG2   waltz16
NUC2       1H
PCPD2     80.00 usec
PL2        0.00 dB
PL12       22.00 dB
PL13       22.00 dB
SFO2       300.1312005 MHz

F2 - Processing parameters
SI         32768
SF         75.4708455 MHz
WDW        EM
SSB        0
LB         1.00 Hz
GB         0
PC         1.40
```

Click-Alkynylation of N- and P- Nucleophiles by Oxidative Cross-Coupling with Alkynylcopper Reagents

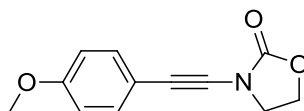

**16b**

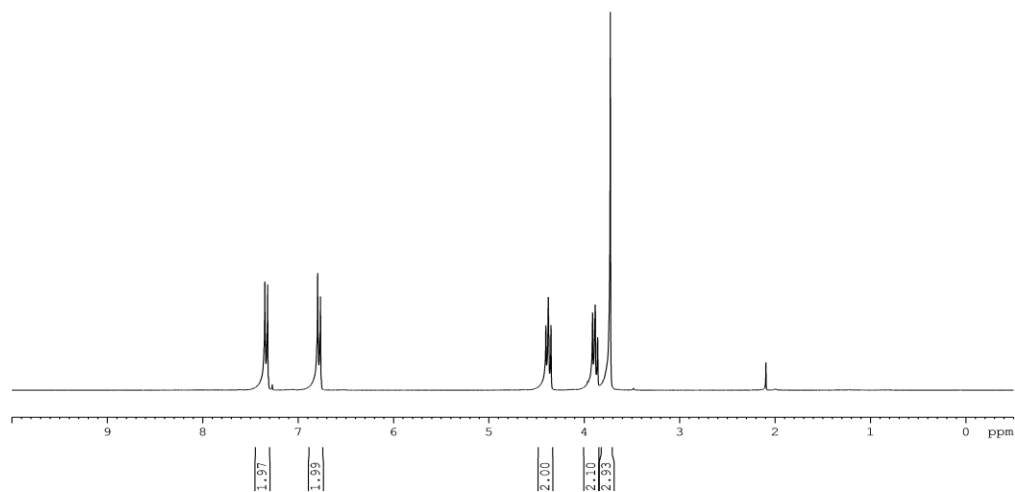

```
Current Data Parameters
NAME      FC16JH43E
EXPNO     10
PROCNO    1

F2 - Acquisition Parameters
Date_     20110423
Time      20.55
INSTRUM   spect
PROBHD    5 mm BBI 1H-BB
PULPROG   zg30
TD         32768
SOLVENT   CDCl3
NS         16
DS         0
SWH        6313.131 Hz
FIDRES     0.192661 Hz
AQ         2.5952756 sec
RG         45.3
DW         79.200 usec
DE         6.50 usec
TE         294.5 K
D1         1.00000000 sec
MCREST    0.00000000 sec
MCWRK     0.01500000 sec

===== CHANNEL f1 =====
NUC1       1H
P1         6.20 usec
PL1        0.00 dB
SFO1       300.1328512 MHz

F2 - Processing parameters
SI         32768
SF         300.1300015 MHz
WDW        EM
SSB        0
LB         0.10 Hz
GB         0
PC         1.00
```

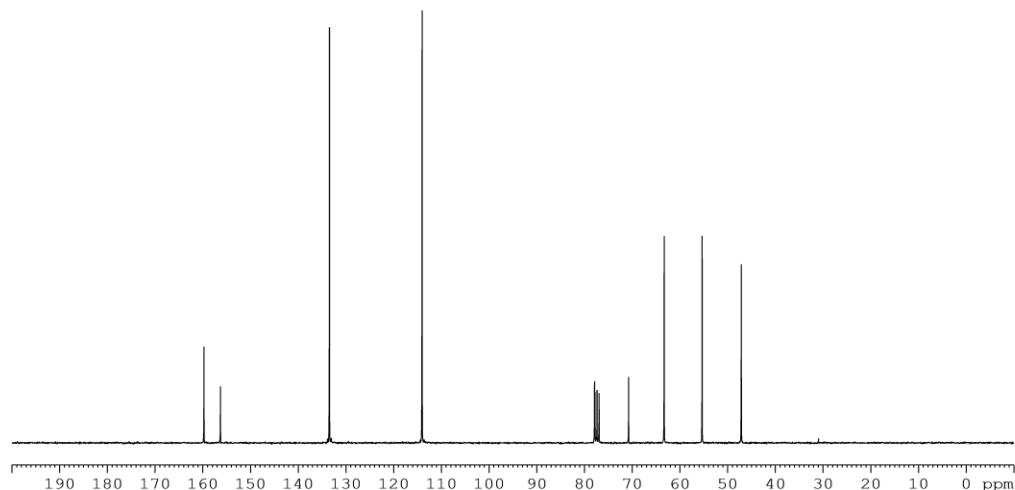

```
Current Data Parameters
NAME      FC16JH43E
EXPNO     11
PROCNO    1

F2 - Acquisition Parameters
Date_     20110423
Time      22.04
INSTRUM   spect
PROBHD    5 mm BBI 1H-BB
PULPROG   zgpg30
TD         65536
SOLVENT   CDCl3
NS         1024
DS         4
SWH        17985.611 Hz
FIDRES     0.274439 Hz
AQ         1.8219508 sec
RG         1625.5
DW         27.800 usec
DE         10.00 usec
TE         294.6 K
D1         2.00000000 sec
d11        0.03000000 sec
DELTA      1.89999998 sec
MCREST    0.00000000 sec
MCWRK     0.01500000 sec

===== CHANNEL f1 =====
NUC1       13C
P1         9.00 usec
PL1        -6.00 dB
SFO1       75.4752953 MHz

===== CHANNEL f2 =====
CPDPRG2   waltz16
NUC2       1H
PCPD2     80.00 usec
PL2        0.00 dB
PL12       22.00 dB
PL13       22.00 dB
SFO2       300.1312005 MHz

F2 - Processing parameters
SI         32768
SF         75.4677446 MHz
WDW        EM
SSB        0
LB         1.00 Hz
GB         0
PC         1.40
```

Click-Alkynylation of N- and P- Nucleophiles by Oxidative Cross-Coupling with Alkynylcopper Reagents

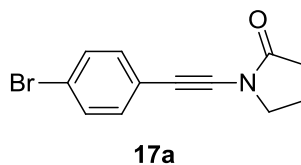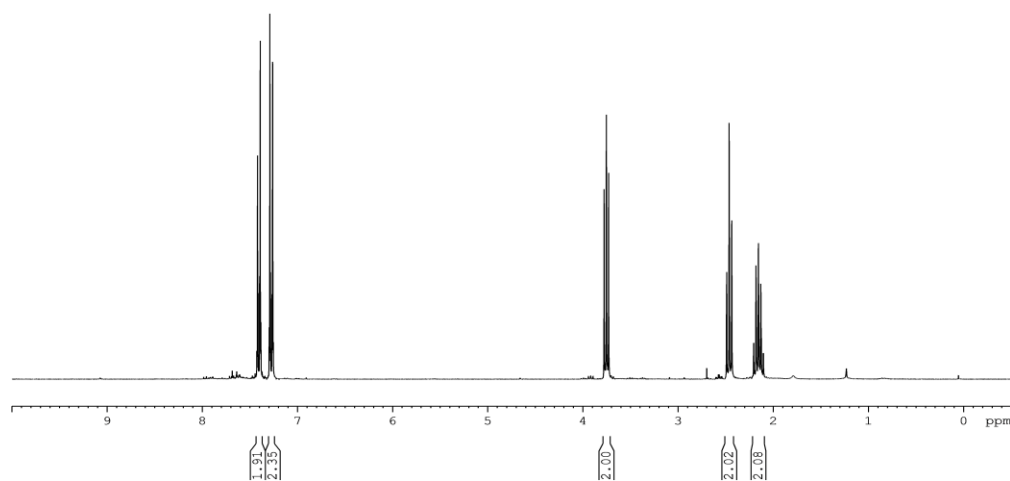

```
Current Data Parameters
NAME      FC15GE030E
EXPNO     20
PROCNO    1

F2 - Acquisition Parameters
Date_     20110417
Time      17.53
INSTRUM   spect
PROBHD    5 mm BBI 1H-BB
PULPROG   zg30
TD         32768
SOLVENT   CDC13
NS         16
DS         0
SWH        6313.131 Hz
FIDRES     0.192661 Hz
AQ         2.5952756 sec
RG         181
DW         79.200 usec
DE         6.50 usec
TE         293.5 K
D1         1.00000000 sec
MCREST     0.00000000 sec
MCWRK     0.01500000 sec

===== CHANNEL f1 =====
NUC1       1H
P1         6.20 usec
PL1        0.00 dB
SFO1       300.1328512 MHz

F2 - Processing parameters
SI         32768
SF         300.1300063 MHz
WDW        EM
SSB        0
LB         0.10 Hz
GB         0
PC         1.00
```

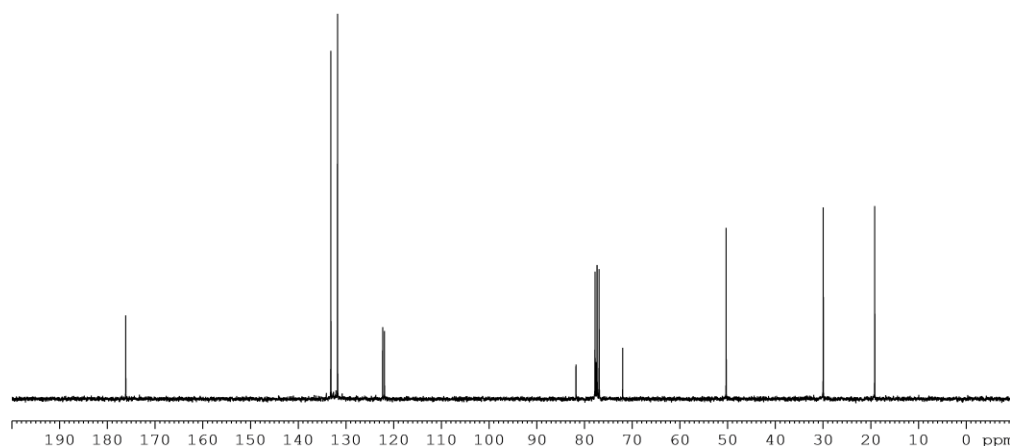

```
Current Data Parameters
NAME      FC15GE030E
EXPNO     21
PROCNO    1

F2 - Acquisition Parameters
Date_     20110417
Time      19.00
INSTRUM   spect
PROBHD    5 mm BBI 1H-BB
PULPROG   zgpg30
TD         65536
SOLVENT   CDC13
NS         1024
DS         4
SWH        17985.611 Hz
FIDRES     0.274439 Hz
AQ         1.8219508 sec
RG         1625.5
DW         27.800 usec
DE         10.00 usec
TE         293.8 K
D1         2.00000000 sec
d11        0.03000000 sec
DELTA      1.89999998 sec
MCREST     0.00000000 sec
MCWRK     0.01500000 sec

===== CHANNEL f1 =====
NUC1       13C
P1         9.00 usec
PL1        -6.00 dB
SFO1       75.4752953 MHz

===== CHANNEL f2 =====
CPDPRG2   waltz16
NUC2       1H
PCPD2      80.00 usec
PL2        0.00 dB
PL12       22.00 dB
PL13       22.00 dB
SFO2       300.1312005 MHz

F2 - Processing parameters
SI         32768
SF         75.4677287 MHz
WDW        EM
SSB        0
LB         1.00 Hz
GB         0
PC         1.40
```

Click-Alkynylation of N- and P- Nucleophiles by Oxidative Cross-Coupling with Alkynylcopper Reagents

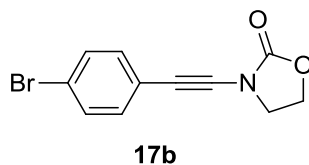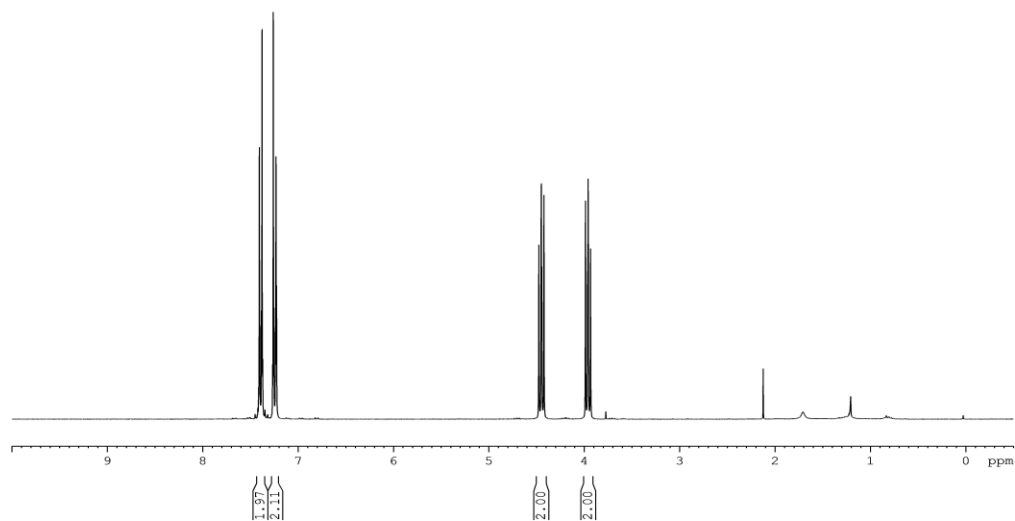

```
Current Data Parameters
NAME          FC16JH43D
EXPNO         10
PROCNO        1

F2 - Acquisition Parameters
Date_         20110423
Time_         22.53
INSTRUM       spect
PROBHD        5 mm BBI 1H-BB
PULPROG       zg30
TD            32768
SOLVENT       CDCl3
NS            16
DS            0
SWH           6313.131 Hz
FIDRES        0.192661 Hz
AQ            2.5952756 sec
RG            256
DW            79.200 usec
DE            6.50 usec
TE            294.4 K
D1            1.00000000 sec
MCREST        0.00000000 sec
MCWRK         0.01500000 sec

===== CHANNEL f1 =====
NUC1          1H
P1            6.20 usec
PL1           0.00 dB
SFO1          300.1328512 MHz

F2 - Processing parameters
SI            32768
SF            300.1300165 MHz
WDW           EM
SSB           0
LB            0.10 Hz
GB            0
PC            1.00
```

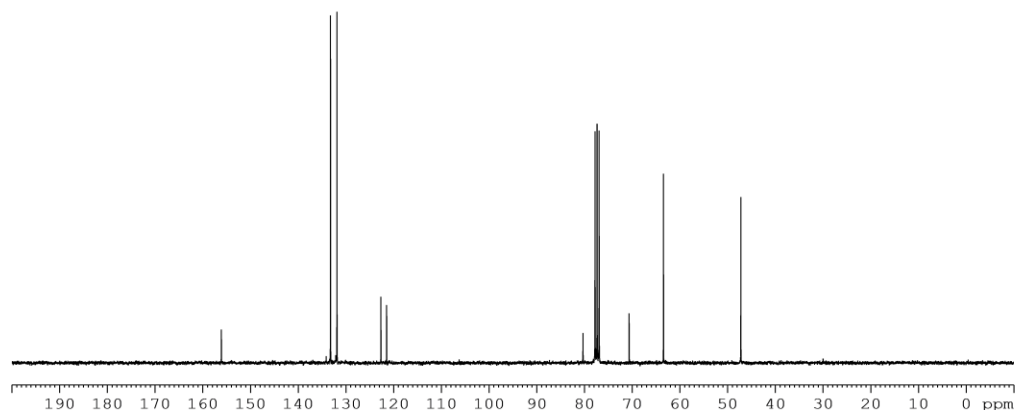

```
Current Data Parameters
NAME          FC16JH43D
EXPNO         11
PROCNO        1

F2 - Acquisition Parameters
Date_         20110424
Time_         1.07
INSTRUM       spect
PROBHD        5 mm BBI 1H-BB
PULPROG       zgpg30
TD            65536
SOLVENT       CDCl3
NS            2048
DS            4
SWH           17985.611 Hz
FIDRES        0.274439 Hz
AQ            1.8219508 sec
RG            1625.5
DW            27.800 usec
DE            10.00 usec
TE            294.5 K
D1            2.00000000 sec
d11           0.03000000 sec
DELTA         1.89999998 sec
MCREST        0.00000000 sec
MCWRK         0.01500000 sec

===== CHANNEL f1 =====
NUC1          13C
P1            9.00 usec
PL1           -6.00 dB
SFO1          75.4752953 MHz

===== CHANNEL f2 =====
CPDPRG2       waltz16
NUC2          1H
PCPD2         80.00 usec
PL2           0.00 dB
PL12          22.00 dB
PL13          22.00 dB
SFO2          300.1312005 MHz

F2 - Processing parameters
SI            32768
SF            75.4677276 MHz
WDW           EM
SSB           0
LB            1.00 Hz
GB            0
PC            1.40
```

Click-Alkynylation of N- and P- Nucleophiles by Oxidative Cross-Coupling with Alkynylcopper Reagents

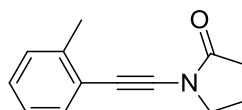

18a

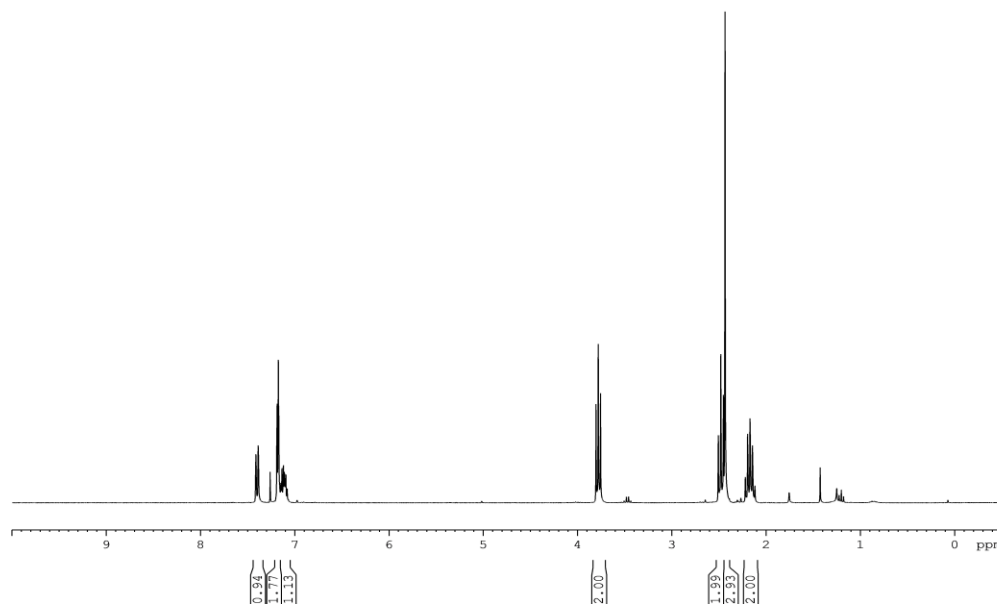

```
Current Data Parameters
NAME      fc47kj722c
EXPNO     12
PROCNO    1

F2 - Acquisition Parameters
Date_     20111125
Time      1.32
INSTRUM   spect
PROBHD    5 mm QNP 1H/13
PULPROG   zg30
TD         16384
SOLVENT   CDCl3
NS         16
DS         2
SWH        4194.631 Hz
FIDRES     0.256020 Hz
AQ         1.9530228 sec
RG         287.4
DW         119.200 usec
DE         6.50 usec
TE         294.4 K
D1         1.00000000 sec
MCREST     0.00000000 sec
MCWRK     0.01500000 sec

===== CHANNEL f1 =====
NUC1       1H
P1         6.50 usec
PL1        -6.00 dB
SFO1       300.1319508 MHz

F2 - Processing parameters
SI         32768
SF         300.1300059 MHz
WDW        EM
SSB        0
LB         0.10 Hz
GB         0
PC         1.00

1D NMR plot parameters
CX         20.00 cm
CY         14.59 cm
F1P        7.844 ppm
F1         2354.35 Hz
F2P        6.808 ppm
F2         2043.15 Hz
PFMCM      0.05185 ppm/cm
HZCM       15.56033 Hz/cm
```

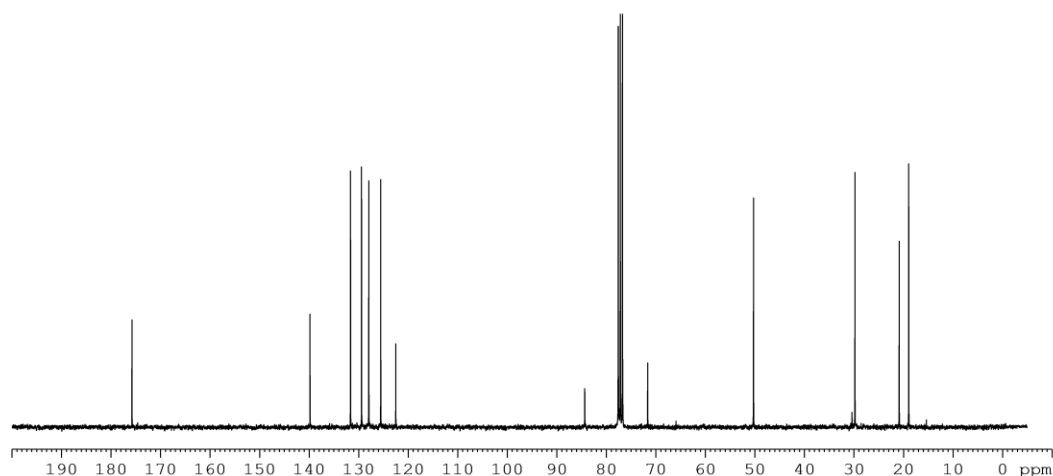

```
Current Data Parameters
NAME      fc47kj722c
EXPNO     10
PROCNO    1

F2 - Acquisition Parameters
Date_     20111125
Time      1.15
INSTRUM   spect
PROBHD    5 mm QNP 1H/13
PULPROG   zgpg30
TD         32768
SOLVENT   CDCl3
NS         1024
DS         4
SWH        18115.941 Hz
FIDRES     0.552855 Hz
AQ         0.9044468 sec
RG         16384
DW         27.600 usec
DE         10.00 usec
TE         294.7 K
D1         2.00000000 sec
d11        0.03000000 sec
DELTA      1.89999998 sec
MCREST     0.00000000 sec
MCWRK     0.01500000 sec

===== CHANNEL f1 =====
NUC1       13C
P1         5.10 usec
PL1        -6.00 dB
SFO1       75.4764278 MHz

===== CHANNEL f2 =====
CPDPRG2   waltz16
NUC2       1H
PCPD2     80.00 usec
PL2        -6.00 dB
PL12       15.80 dB
PL13       15.80 dB
SFO2       300.1312005 MHz

F2 - Processing parameters
SI         32768
SF         75.4677437 MHz
WDW        EM
SSB        0
LB         1.00 Hz
GB         0
PC         1.40

1D NMR plot parameters
CX         20.00 cm
CY         6.77 cm
F1P        200.000 ppm
F1         15093.55 Hz
F2P        -10.000 ppm
F2         -754.68 Hz
PFMCM      10.50000 ppm/cm
HZCM       792.41132 Hz/cm
```

Click-Alkynylation of N- and P- Nucleophiles by Oxidative Cross-Coupling with Alkynylcopper Reagents

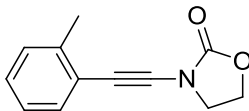

18b

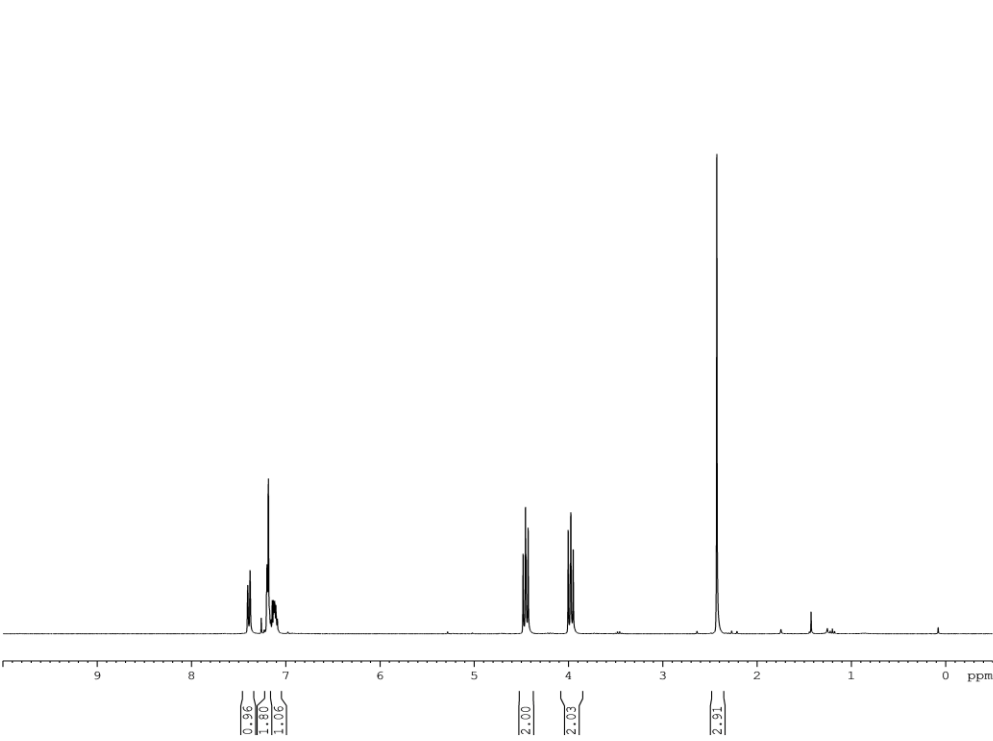

Current Data Parameters  
NAME fc47kj722f  
EXPNO 12  
PROCNO 1

F2 - Acquisition Parameters  
Date\_ 20111123  
Time\_ 13.00  
INSTRUM spect  
PROBHD 5 mm QNP 1H/13  
PULPROG zg30  
TD 16384  
SOLVENT CDCl3  
NS 16  
DS 2  
SWH 4194.631 Hz  
FIDRES 0.256020 Hz  
AQ 1.9530228 sec  
RG 203.2  
DW 119.200 usec  
DE 6.50 usec  
TE 294.4 K  
D1 1.00000000 sec  
MCREST 0.00000000 sec  
MCWRK 0.01500000 sec

===== CHANNEL f1 =====  
NUC1 1H  
P1 6.50 usec  
PL1 -6.00 dB  
SFO1 300.1319508 MHz

F2 - Processing parameters  
SI 32768  
SF 300.1300062 MHz  
WDW EM  
SSB 0  
LB 0.10 Hz  
GB 0  
PC 1.00

1D NMR plot parameters  
CX 20.00 cm  
CY 12.98 cm  
F1P 7.803 ppm  
F1 2341.85 Hz  
F2P 6.661 ppm  
F2 1999.04 Hz  
PFMCM 0.057111 ppm/cm  
HZCM 17.14047 Hz/cm

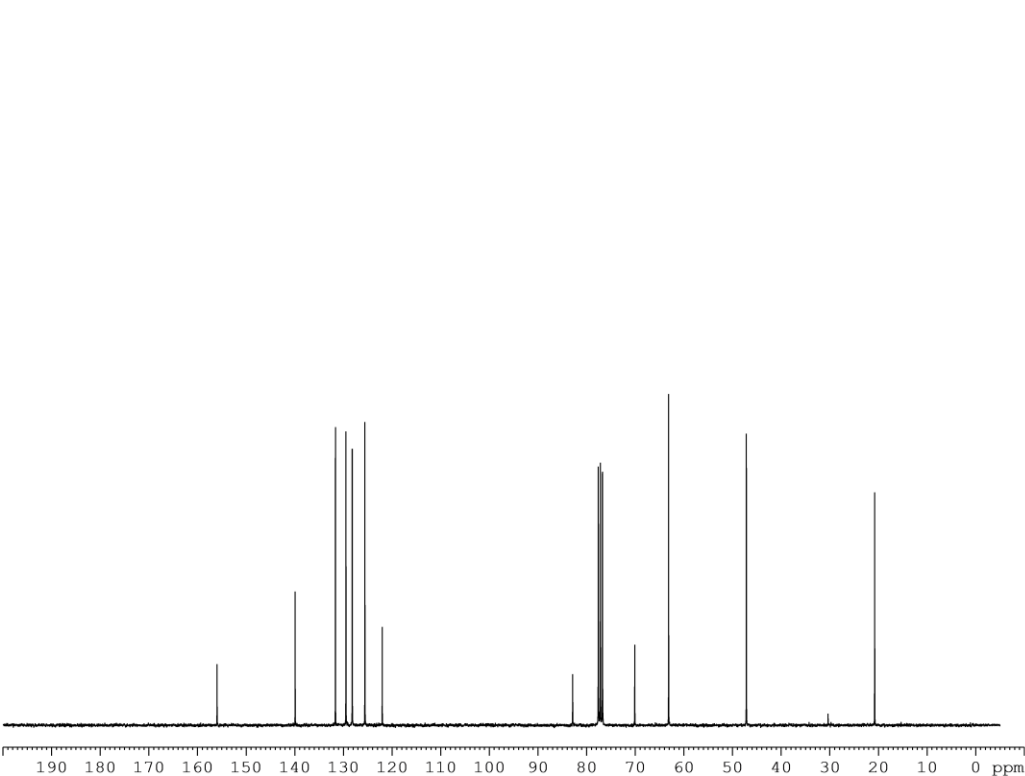

Current Data Parameters  
NAME fc47kj722f  
EXPNO 10  
PROCNO 1

F2 - Acquisition Parameters  
Date\_ 20111123  
Time\_ 12.43  
INSTRUM spect  
PROBHD 5 mm QNP 1H/13  
PULPROG zgpg30  
TD 32768  
SOLVENT CDCl3  
NS 1024  
DS 4  
SWH 18115.941 Hz  
FIDRES 0.552855 Hz  
AQ 0.9044468 sec  
RG 11585.2  
DW 27.600 usec  
DE 10.00 usec  
TE 294.7 K  
D1 2.00000000 sec  
d11 0.03000000 sec  
DELTA 1.89999999 sec  
MCREST 0.00000000 sec  
MCWRK 0.01500000 sec

===== CHANNEL f1 =====  
NUC1 13C  
P1 5.10 usec  
PL1 -6.00 dB  
SFO1 75.4764278 MHz

===== CHANNEL f2 =====  
CPDPRG2 waltz16  
NUC2 1H  
PCPD2 80.00 usec  
PL2 -6.00 dB  
PL12 15.80 dB  
PL13 15.80 dB  
SFO2 300.1312005 MHz

F2 - Processing parameters  
SI 32768  
SF 75.4677479 MHz  
WDW EM  
SSB 0  
LB 1.00 Hz  
GB 0  
PC 1.40

1D NMR plot parameters  
CX 20.00 cm  
CY 6.57 cm  
F1P 200.000 ppm  
F1 15093.55 Hz  
F2P -10.000 ppm  
F2 -754.68 Hz  
PFMCM 10.50000 ppm/cm  
HZCM 792.41138 Hz/cm

Click-Alkynylation of N- and P- Nucleophiles by Oxidative Cross-Coupling with Alkynylcopper Reagents

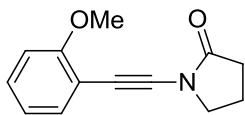

19a

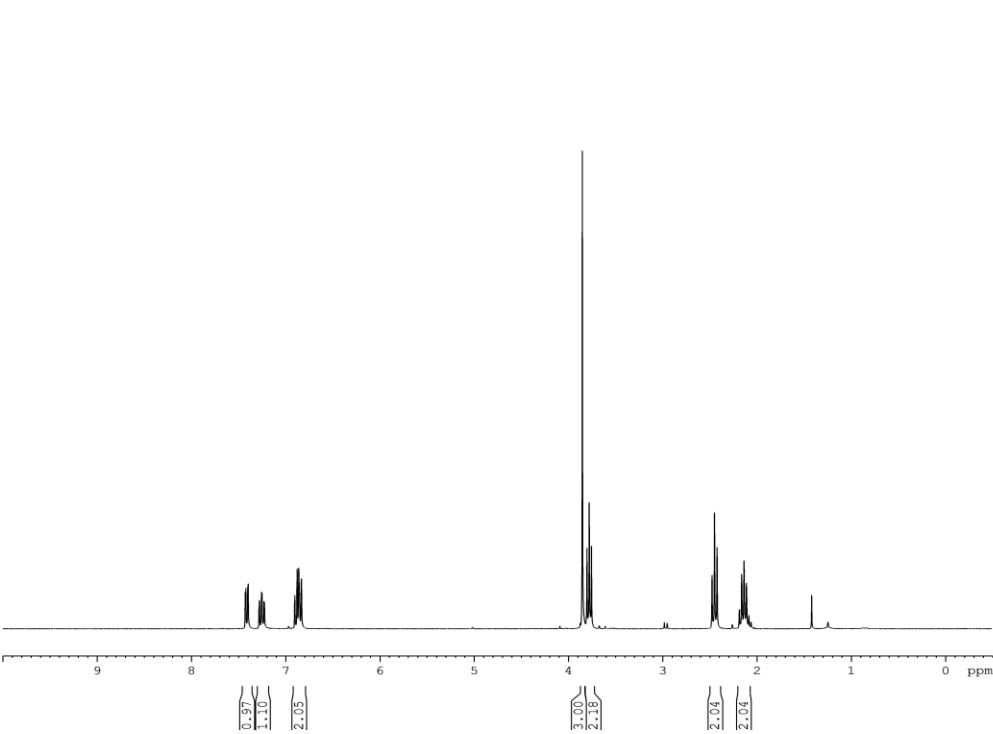

Current Data Parameters  
NAME fc47kj722a  
EXPNO 10  
PROCNO 1

F2 - Acquisition Parameters  
Date\_ 2011123  
Time\_ 23.43  
INSTRUM spect  
PROBHD 5 mm QNP 1H/13  
PULPROG zg30  
TD 16384  
SOLVENT CDCl3  
NS 16  
DS 2  
SWH 4194.631 Hz  
FIDRES 0.256020 Hz  
AQ 1.9530228 sec  
RG 181  
DW 119.200 usec  
DE 6.50 usec  
TE 294.3 K  
D1 1.00000000 sec  
MCREST 0.00000000 sec  
MCWRK 0.01500000 sec

===== CHANNEL f1 =====  
NUC1 1H  
P1 6.50 usec  
PL1 -6.00 dB  
SFO1 300.1319508 MHz

F2 - Processing parameters  
SI 32768  
SF 300.1300000 MHz  
WDW EM  
SSB 0  
LB 0.10 Hz  
GB 0  
PC 1.00

1D NMR plot parameters  
CX 20.00 cm  
CY 9.70 cm  
F1P 10.000 ppm  
F1 3001.30 Hz  
F2P -0.500 ppm  
F2 -150.06 Hz  
PFMCM 0.52500 ppm/cm  
HZCM 157.56825 Hz/cm

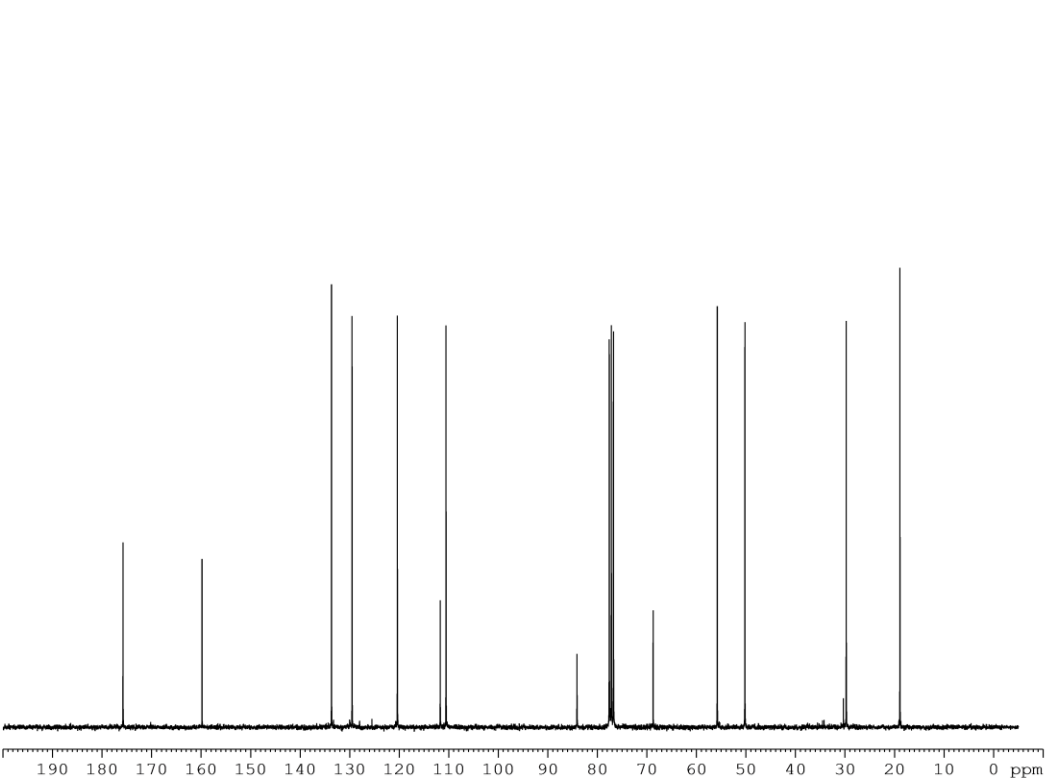

Current Data Parameters  
NAME fc47kj722a  
EXPNO 14  
PROCNO 1

F2 - Acquisition Parameters  
Date\_ 2011124  
Time\_ 3.31  
INSTRUM spect  
PROBHD 5 mm QNP 1H/13  
PULPROG zgpg30  
TD 32768  
SOLVENT CDCl3  
NS 1024  
DS 4  
SWH 18115.941 Hz  
FIDRES 0.552855 Hz  
AQ 0.9044468 sec  
RG 16384  
DW 27.600 usec  
DE 10.00 usec  
TE 294.7 K  
D1 2.00000000 sec  
d11 0.03000000 sec  
DELTA 1.89999998 sec  
MCREST 0.00000000 sec  
MCWRK 0.01500000 sec

===== CHANNEL f1 =====  
NUC1 13C  
P1 5.10 usec  
PL1 -6.00 dB  
SFO1 75.4764278 MHz

===== CHANNEL f2 =====  
CPDPRG2 waltz16  
NUC2 1H  
PCPD2 80.00 usec  
PL2 -6.00 dB  
PL12 15.80 dB  
PL13 15.80 dB  
SFO2 300.1312005 MHz

F2 - Processing parameters  
SI 32768  
SF 75.4677487 MHz  
WDW EM  
SSB 0  
LB 1.00 Hz  
GB 0  
PC 1.40

1D NMR plot parameters  
CX 20.00 cm  
CY 7.32 cm  
F1P 200.000 ppm  
F1 15093.55 Hz  
F2P -10.000 ppm  
F2 -754.68 Hz  
PFMCM 10.50000 ppm/cm  
HZCM 792.41144 Hz/cm

Click-Alkynylation of *N*- and *P*- Nucleophiles by Oxidative Cross-Coupling with Alkynylcopper Reagents

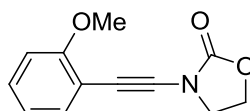

19b

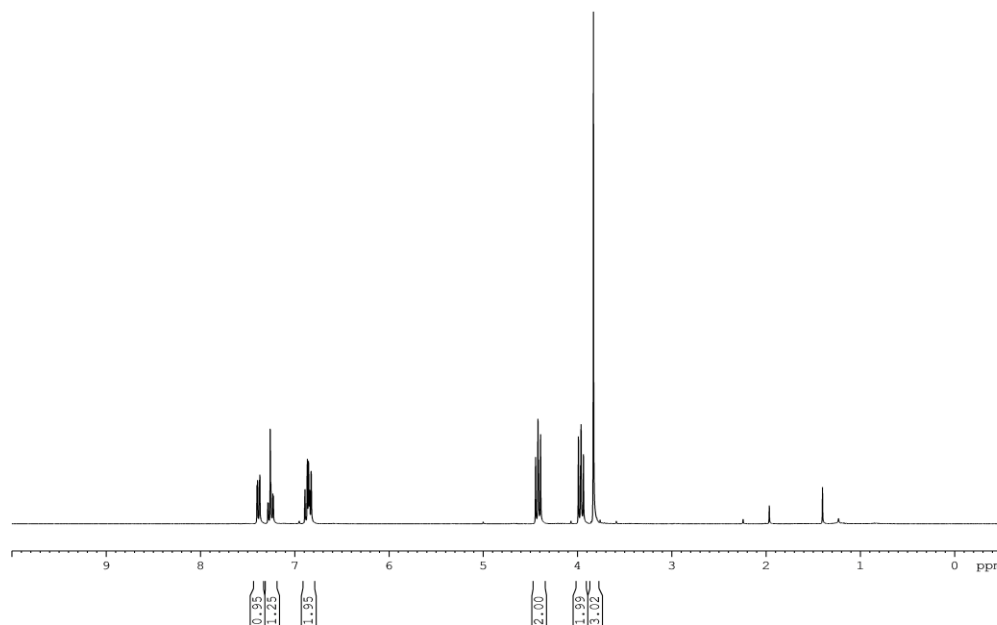

```
Current Data Parameters
NAME      fc47kj722d
EXPNO     12
PROCNO    1

F2 - Acquisition Parameters
Date_     20111125
Time      3.19
INSTRUM   spect
PROBHD    5 mm QNP 1H/13
PULPROG   zg30
TD         16384
SOLVENT   CDCl3
NS         16
DS         2
SWH        4194.631 Hz
FIDRES     0.256020 Hz
AQ         1.9530228 sec
RG         161.3
DW         119.200 usec
DE         6.50 usec
TE         294.4 K
D1         1.00000000 sec
MCREST     0.00000000 sec
MCWRK     0.01500000 sec

===== CHANNEL f1 =====
NUC1       1H
P1         6.50 usec
PL1        -6.00 dB
SFO1       300.1319508 MHz

F2 - Processing parameters
SI         32768
SF         300.1300060 MHz
WDW        EM
SSB        0
LB         0.10 Hz
GB         0
PC         1.00

1D NMR plot parameters
CX         20.00 cm
CY         19.76 cm
F1P        7.881 ppm
F1         2365.37 Hz
F2P        6.611 ppm
F2         1984.18 Hz
PPMCM      0.06350 ppm/cm
HZCM       19.05916 Hz/cm
```

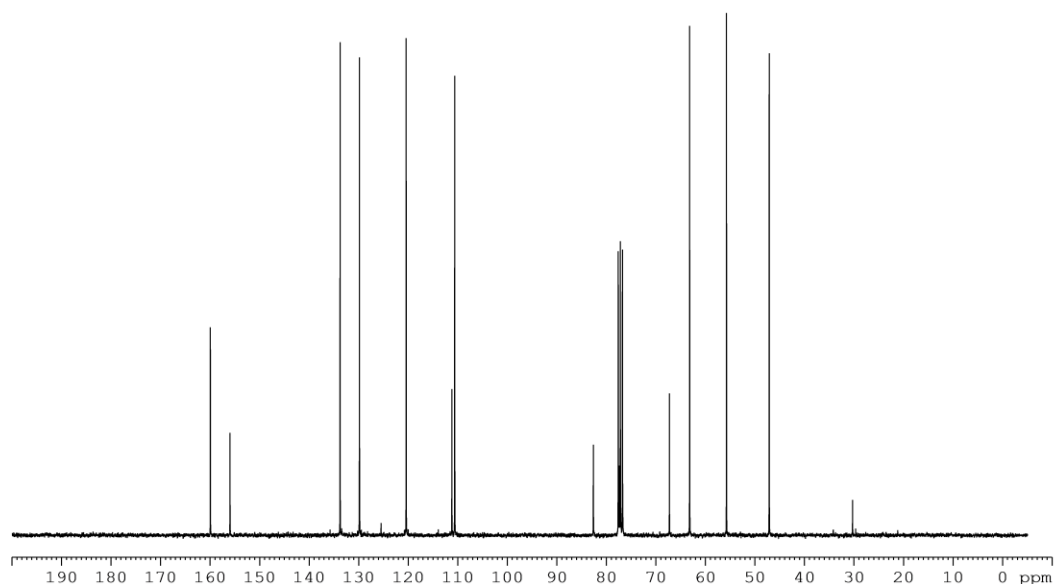

```
Current Data Parameters
NAME      fc47kj722d
EXPNO     10
PROCNO    1

F2 - Acquisition Parameters
Date_     20111125
Time      3.02
INSTRUM   spect
PROBHD    5 mm QNP 1H/13
PULPROG   zgpg30
TD         32768
SOLVENT   CDCl3
NS         1024
DS         4
SWH        18115.941 Hz
FIDRES     0.552855 Hz
AQ         0.9044468 sec
RG         16384
DW         27.600 usec
DE         10.00 usec
TE         294.7 K
D1         2.00000000 sec
d11        0.03000000 sec
DELTA      1.89999998 sec
MCREST     0.00000000 sec
MCWRK     0.01500000 sec

===== CHANNEL f1 =====
NUC1       13C
P1         5.10 usec
PL1        -6.00 dB
SFO1       75.4764278 MHz

===== CHANNEL f2 =====
CPDPRG2   waltz16
NUC2       1H
PCPD2     80.00 usec
PL2       -6.00 dB
PL12      15.80 dB
PL13      15.80 dB
SFO2      300.1312005 MHz

F2 - Processing parameters
SI         32768
SF         75.4677514 MHz
WDW        EM
SSB        0
LB         1.00 Hz
GB         0
PC         1.40

1D NMR plot parameters
CX         20.00 cm
CY         8.02 cm
F1P        200.000 ppm
F1         15093.55 Hz
F2P       -10.000 ppm
F2        -754.68 Hz
PPMCM     10.50000 ppm/cm
HZCM      792.41138 Hz/cm
```



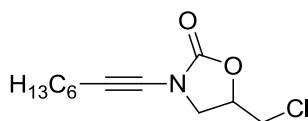

21

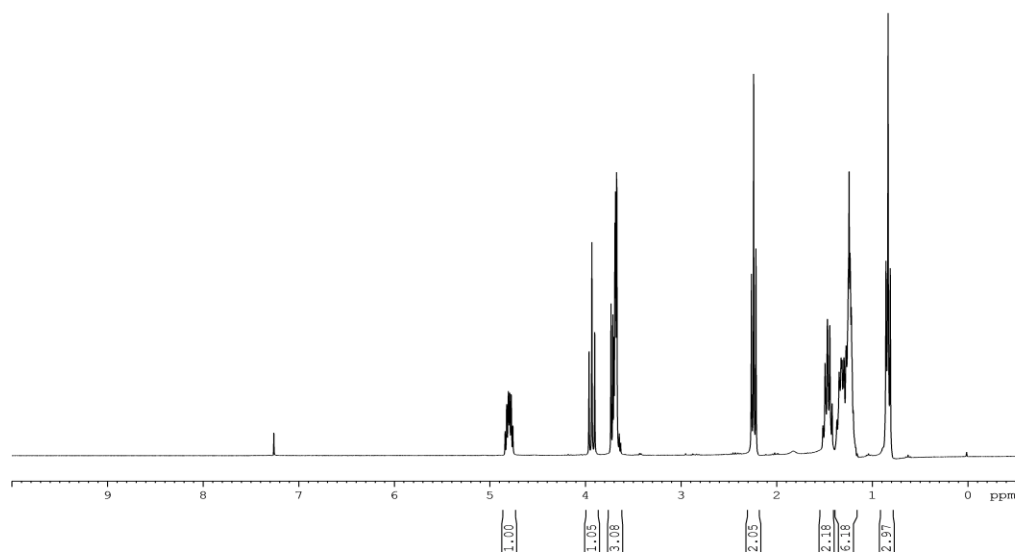

Current Data Parameters  
NAME fc35g106b  
EXPNO 12  
PROCNO 1

F2 - Acquisition Parameters  
Date\_ 20110902  
Time 3.52  
INSTRUM spect  
PROBHD 5 mm BBI 1H-BB  
PULPROG zg30  
TD 32768  
SOLVENT CDC13  
NS 16  
DS 0  
SWH 6313.131 Hz  
FIDRES 0.192661 Hz  
AQ 2.5952756 sec  
RG 40.3  
DW 79.200 usec  
DE 6.50 usec  
TE 295.1 K  
D1 1.00000000 sec  
MCREST 0.00000000 sec  
MCWRK 0.01500000 sec

===== CHANNEL f1 =====  
NUC1 1H  
P1 6.20 usec  
PL1 0.00 dB  
SFO1 300.1328512 MHz

F2 - Processing parameters  
SI 32768  
SF 300.1300057 MHz  
WDW EM  
SSB 0  
LB 0.10 Hz  
GB 0  
PC 1.00

1D NMR plot parameters  
CX 20.00 cm  
CY 7.86 cm  
F1P 10.000 ppm  
F1 3001.30 Hz  
F2P -0.500 ppm  
F2 -150.06 Hz  
PPMCM 0.52500 ppm/cm  
HZCM 157.56825 Hz/cm

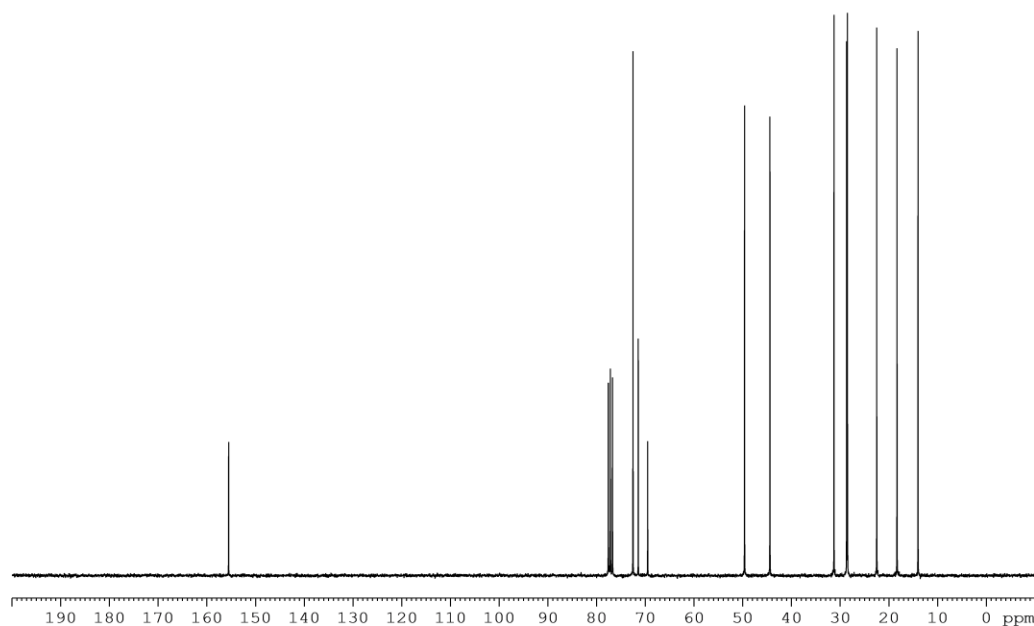

Current Data Parameters  
NAME fc35g106b  
EXPNO 10  
PROCNO 1

F2 - Acquisition Parameters  
Date\_ 20110902  
Time 3.34  
INSTRUM spect  
PROBHD 5 mm BBI 1H-BB  
PULPROG zgpg30  
TD 65536  
SOLVENT CDC13  
NS 2000  
DS 4  
SWH 17985.611 Hz  
FIDRES 0.274439 Hz  
AQ 1.8219508 sec  
RG 1824.6  
DW 27.800 usec  
DE 10.00 usec  
TE 295.3 K  
D1 2.00000000 sec  
d11 0.03000000 sec  
DELTA 1.89999998 sec  
MCREST 0.00000000 sec  
MCWRK 0.01500000 sec

===== CHANNEL f1 =====  
NUC1 13C  
P1 9.00 usec  
PL1 -6.00 dB  
SFO1 75.4752953 MHz

===== CHANNEL f2 =====  
CPDPRG2 waltz16  
NUC2 1H  
PCPD2 80.00 usec  
PL2 0.00 dB  
PL12 22.00 dB  
PL13 22.00 dB  
SFO2 300.1312005 MHz

F2 - Processing parameters  
SI 32768  
SF 75.4677487 MHz  
WDW EM  
SSB 0  
LB 1.00 Hz  
GB 0  
PC 1.40

1D NMR plot parameters  
CX 20.00 cm  
CY 8.52 cm  
F1P 200.000 ppm  
F1 15093.55 Hz  
F2P -10.000 ppm  
F2 -754.68 Hz  
PPMCM 10.50000 ppm/cm  
HZCM 792.41138 Hz/cm

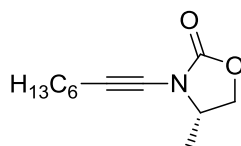

22

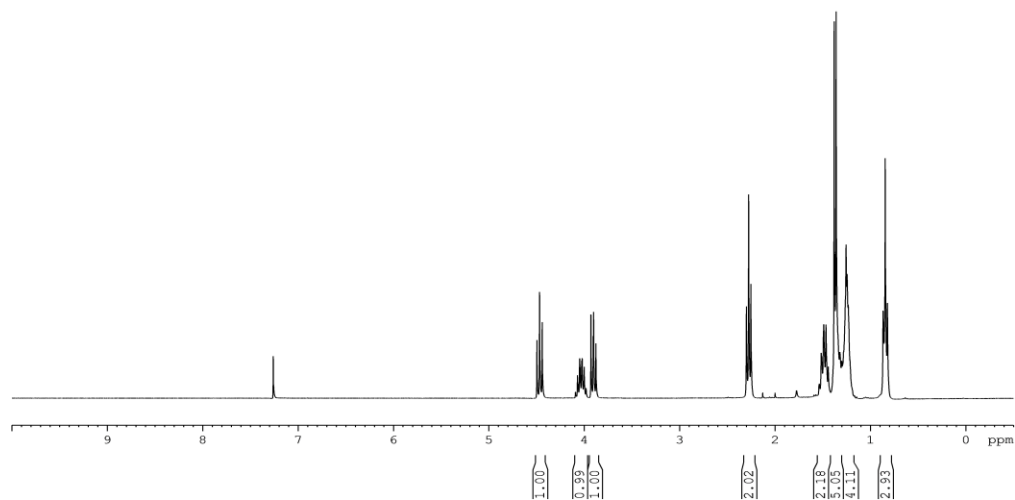

```
Current Data Parameters
NAME      fc22jh075
EXPNO     12
PROCNO    1

F2 - Acquisition Parameters
Date_     20110602
Time      22.07
INSTRUM   spect
PROBHD    5 mm BBI 1H-BB
PULPROG   zg30
TD         32768
SOLVENT   CDCl3
NS         16
DS         0
SWH        6313.131 Hz
FIDRES     0.192661 Hz
AQ         2.5952756 sec
RG         50.8
DW         79.200 usec
DE         6.50 usec
TE         294.4 K
D1         1.00000000 sec
MCREST    0.00000000 sec
MCWRK     0.01500000 sec

===== CHANNEL f1 =====
NUC1       1H
P1         6.20 usec
PL1        0.00 dB
SFO1       300.1328512 MHz

F2 - Processing parameters
SI         32768
SF         300.1300061 MHz
WDW        EM
SSB        0
LB         0.10 Hz
GB         0
PC         1.00
```

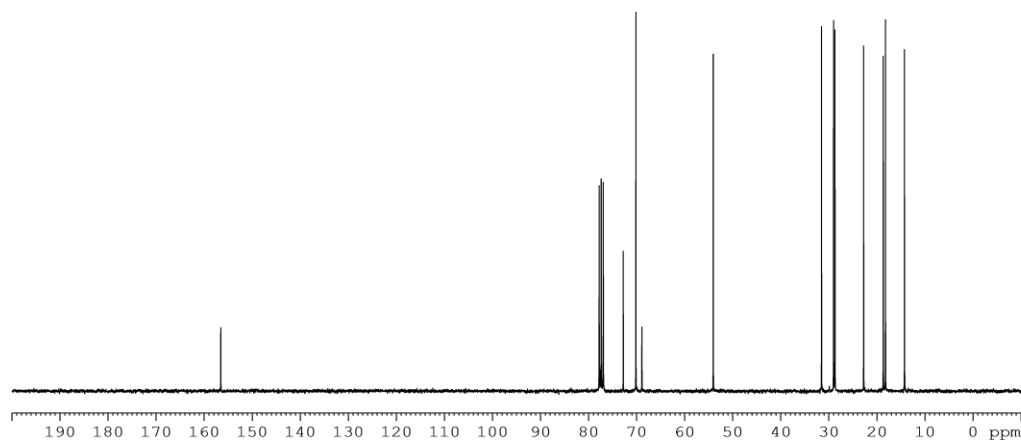

```
Current Data Parameters
NAME      fc22jh075
EXPNO     10
PROCNO    1

F2 - Acquisition Parameters
Date_     20110602
Time      21.46
INSTRUM   spect
PROBHD    5 mm BBI 1H-BB
PULPROG   zgpg30
TD         65536
SOLVENT   CDCl3
NS         2048
DS         4
SWH        17985.611 Hz
FIDRES     0.274439 Hz
AQ         1.8219508 sec
RG         1824.6
DW         27.800 usec
DE         10.00 usec
TE         294.6 K
D1         2.00000000 sec
d11        0.03000000 sec
DELTA     1.89999998 sec
MCREST    0.00000000 sec
MCWRK     0.01500000 sec

===== CHANNEL f1 =====
NUC1       13C
P1         9.00 usec
PL1        -6.00 dB
SFO1       75.4752953 MHz

===== CHANNEL f2 =====
CPDPRG2   waltz16
NUC2       1H
PCPD2      80.00 usec
PL2        0.00 dB
PL12       22.00 dB
PL13       22.00 dB
SFO2       300.1312005 MHz

F2 - Processing parameters
SI         32768
SF         75.4677303 MHz
WDW        EM
SSB        0
LB         1.00 Hz
GB         0
PC         1.40
```

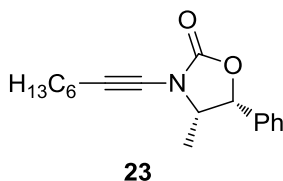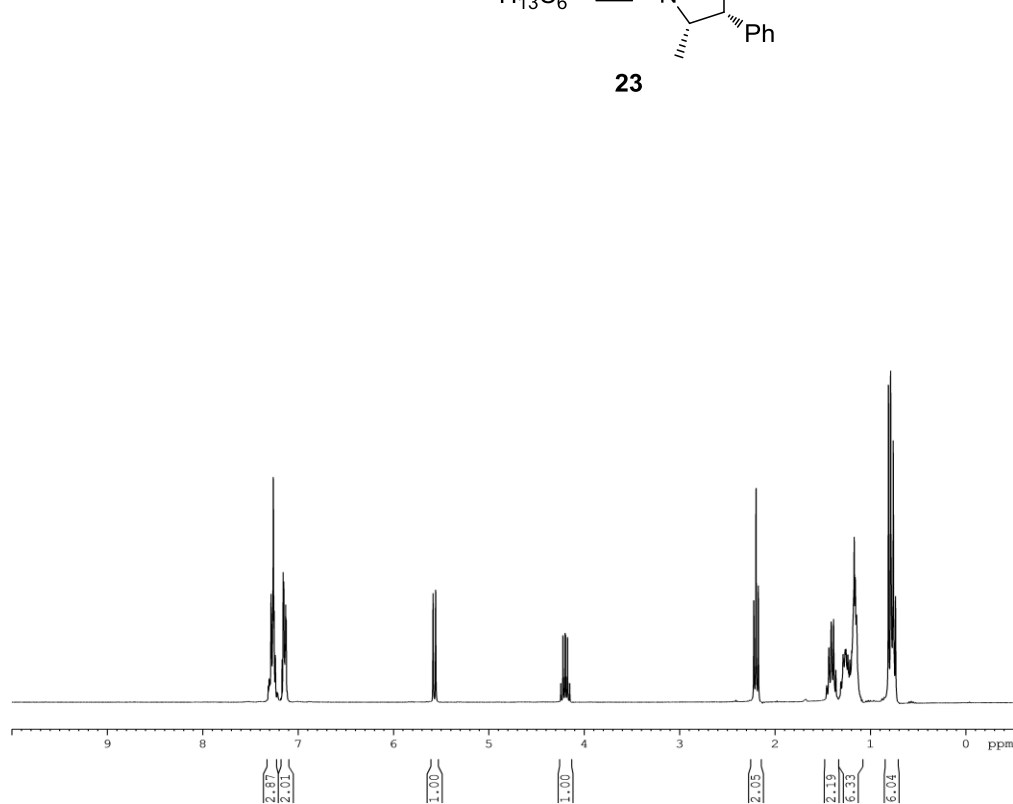

```
Current Data Parameters
NAME      fcl2ge28b
EXPNO     12
PROCNO    1

F2 - Acquisition Parameters
Date_     20110325
Time      1.44
INSTRUM   spect
PROBHD    5 mm BBI 1H-BB
PULPROG   zg30
TD         32768
SOLVENT   CDCl3
NS         16
DS         0
SWH        6313.131 Hz
FIDRES     0.192661 Hz
AQ         2.5952756 sec
RG         50.8
DW         79.200 usec
DE         6.50 usec
TE         293.5 K
D1         1.00000000 sec
MCREST    0.00000000 sec
MCWRK     0.01500000 sec

===== CHANNEL f1 =====
NUC1       1H
P1         6.20 usec
PL1        0.00 dB
SFO1       300.1328512 MHz

F2 - Processing parameters
SI         32768
SF         300.1300746 MHz
WDW        EM
SSB        0
LB         0.10 Hz
GB         0
PC         1.00
```

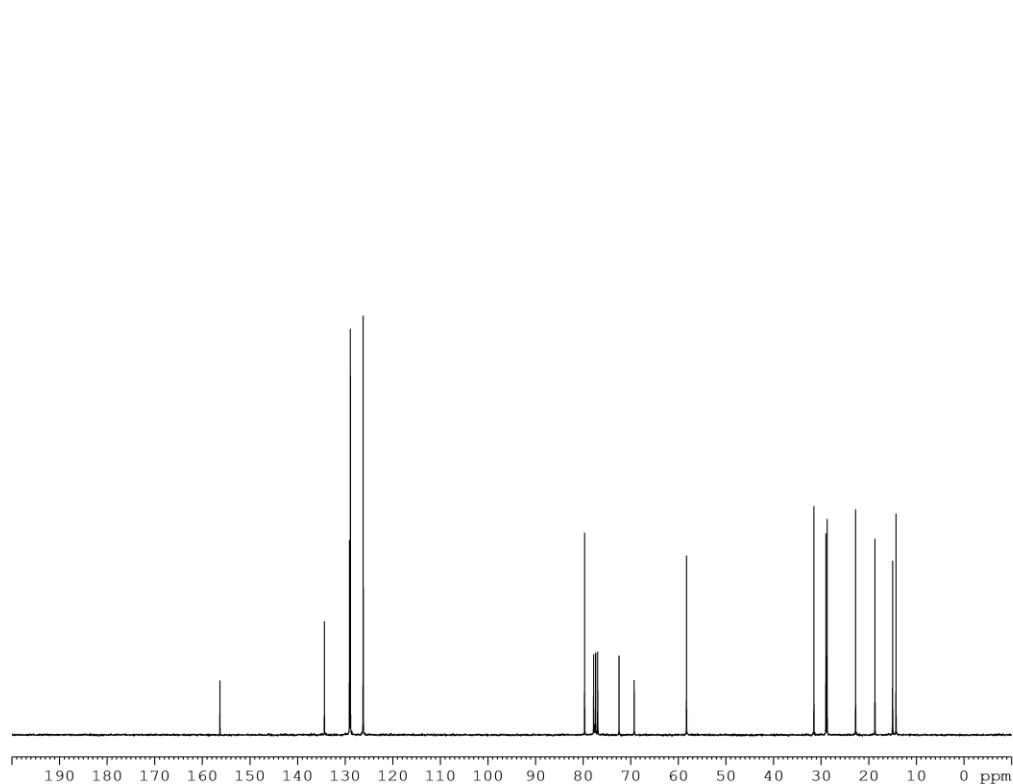

```
Current Data Parameters
NAME      fcl2ge28b
EXPNO     10
PROCNO    1

F2 - Acquisition Parameters
Date_     20110325
Time      1.25
INSTRUM   spect
PROBHD    5 mm BBI 1H-BB
PULPROG   zgpg30
TD         65536
SOLVENT   CDCl3
NS         2000
DS         4
SWH        17985.611 Hz
FIDRES     0.274439 Hz
AQ         1.8219508 sec
RG         1625.5
DW         27.800 usec
DE         10.00 usec
TE         293.7 K
D1         2.00000000 sec
d11        0.03000000 sec
DELTA     1.89999998 sec
MCREST    0.00000000 sec
MCWRK     0.01500000 sec

===== CHANNEL f1 =====
NUC1       13C
P1         9.00 usec
PL1        -6.00 dB
SFO1       75.4752953 MHz

===== CHANNEL f2 =====
CPDPRG2   waltz16
NUC2       1H
PCPD2     80.00 usec
PL2        0.00 dB
PL12       22.00 dB
PL13       22.00 dB
SFO2       300.1312005 MHz

F2 - Processing parameters
SI         32768
SF         75.4677309 MHz
WDW        EM
SSB        0
LB         1.00 Hz
GB         0
PC         1.40
```

Click-Alkynylation of N- and P- Nucleophiles by Oxidative Cross-Coupling with Alkynylcopper Reagents

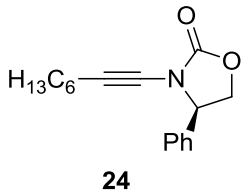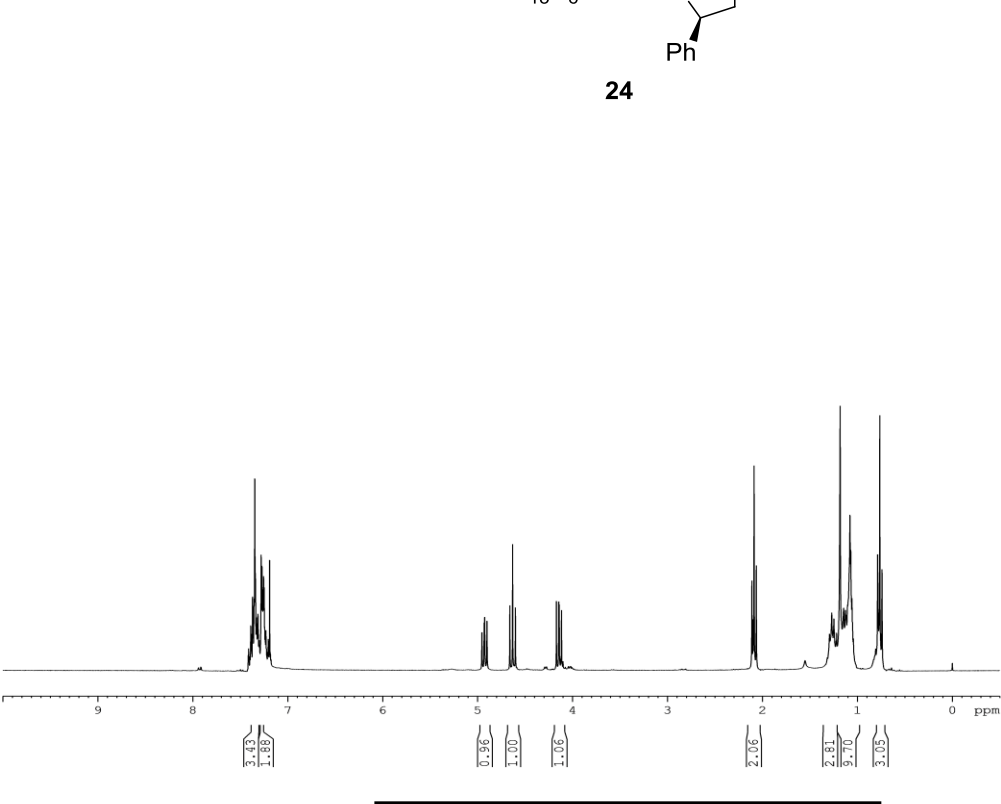

Current Data Parameters  
NAME FC12GE028D  
EXPNO 12  
PROCNO 1

F2 - Acquisition Parameters  
Date\_ 20110326  
Time 5.57  
INSTRUM spect  
PROBHD 5 mm BBI 1H-BB  
PULPROG zg30  
TD 32768  
SOLVENT CDCl3  
NS 16  
DS 0  
SWH 6313.131 Hz  
FIDRES 0.192661 Hz  
AQ 2.5952756 sec  
RG 203.2  
DW 79.200 usec  
DE 6.50 usec  
TE 293.7 K  
D1 1.00000000 sec  
MCREST 0.00000000 sec  
MCWRK 0.01500000 sec

===== CHANNEL f1 =====  
NUC1 1H  
P1 6.20 usec  
PL1 0.00 dB  
SFO1 300.1328512 MHz

F2 - Processing parameters  
SI 32768  
SF 300.1300268 MHz  
WDW EM  
SSB 0  
LB 0.10 Hz  
GB 0  
PC 1.00

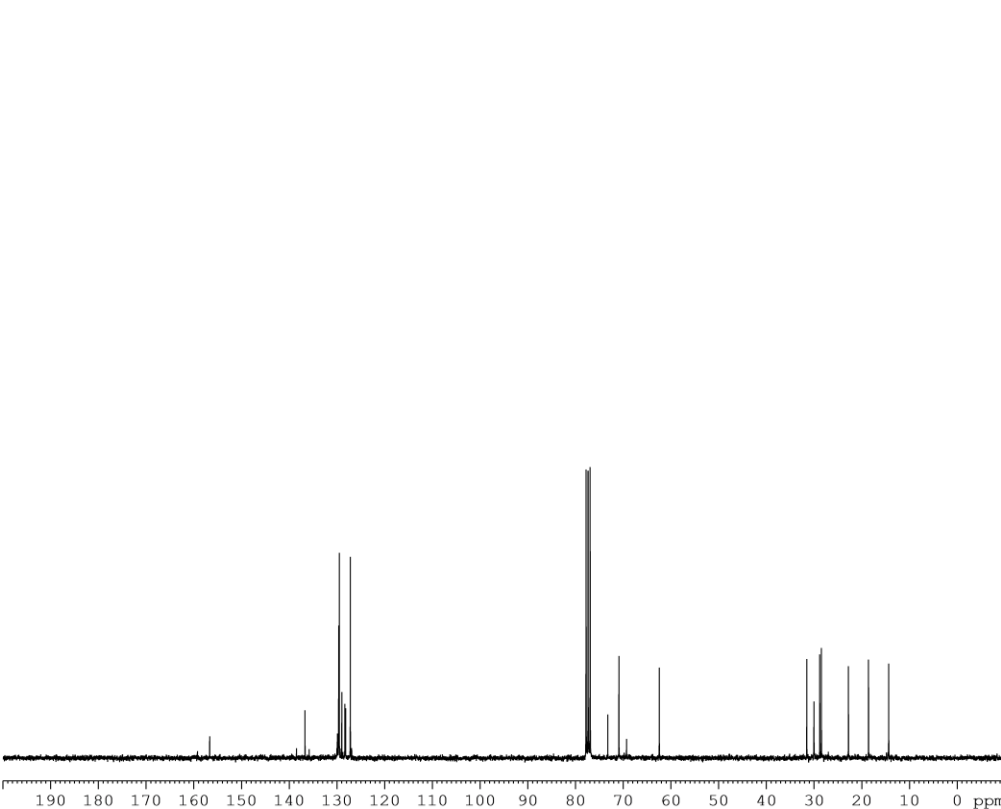

Current Data Parameters  
NAME FC12GE028D  
EXPNO 10  
PROCNO 1

F2 - Acquisition Parameters  
Date\_ 20110326  
Time 5.38  
INSTRUM spect  
PROBHD 5 mm BBI 1H-BB  
PULPROG zgpg30  
TD 65536  
SOLVENT CDCl3  
NS 2048  
DS 4  
SWH 17985.611 Hz  
FIDRES 0.274439 Hz  
AQ 1.8219508 sec  
RG 1448.2  
DW 27.800 usec  
DE 10.00 usec  
TE 293.9 K  
D1 2.00000000 sec  
d11 0.03000000 sec  
DELTA 1.89999998 sec  
MCREST 0.00000000 sec  
MCWRK 0.01500000 sec

===== CHANNEL f1 =====  
NUC1 13C  
P1 9.00 usec  
PL1 -6.00 dB  
SFO1 75.4752953 MHz

===== CHANNEL f2 =====  
CPDPRG2 waltz16  
NUC2 1H  
PCPD2 80.00 usec  
PL2 0.00 dB  
PL12 22.00 dB  
PL13 22.00 dB  
SFO2 300.1312005 MHz

F2 - Processing parameters  
SI 32768  
SF 75.4677260 MHz  
WDW EM  
SSB 0  
LB 1.00 Hz  
GB 0  
PC 1.40

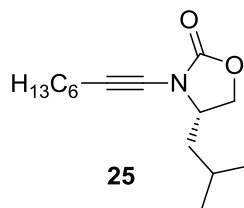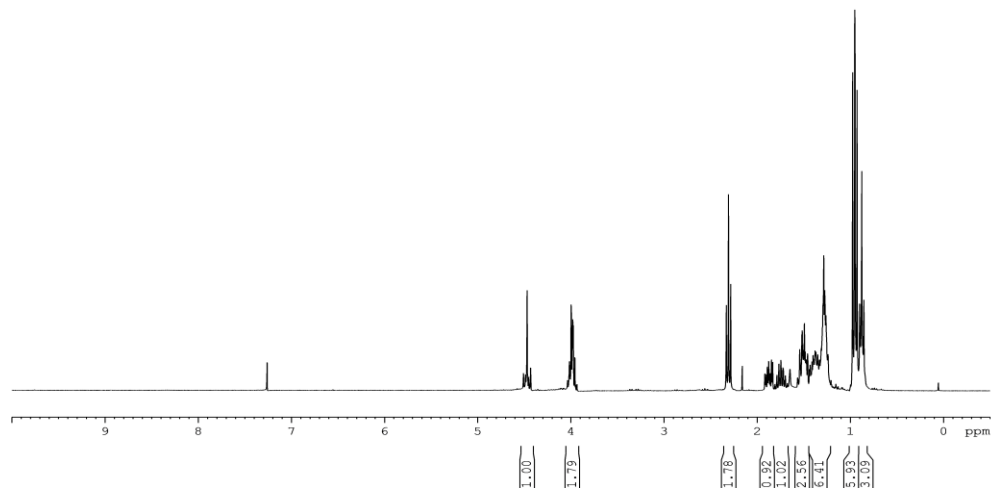

```

Current Data Parameters
NAME      FC12GE028E
EXPNO     12
PROCNO    1

F2 - Acquisition Parameters
Date_     20110326
Time      8.43
INSTRUM   spect
PROBHD    5 mm BBI 1H-BB
PULPROG   zg30
TD        32768
SOLVENT   CDCl3
NS        16
DS        0
SWH        6313.131 Hz
FIDRES     0.192661 Hz
AQ         2.5952756 sec
RG         161.3
DW         79.200 usec
DE         6.50 usec
TE         293.7 K
D1         1.00000000 sec
MCREST     0.00000000 sec
MCWRK      0.01500000 sec

===== CHANNEL f1 =====
NUC1       1H
P1         6.20 usec
PL1        0.00 dB
SFO1       300.1328512 MHz

F2 - Processing parameters
SI         32768
SF         300.1300059 MHz
WDW        EM
SSB        0
LB         0.10 Hz
GB         0
PC         1.00

1D NMR plot parameters
CX         20.00 cm
CY         14.42 cm
FLP        2.469 ppm
F1         740.89 Hz
F2P        2.134 ppm
F2         640.55 Hz
PPMCM      0.01672 ppm/cm
HZCM       5.01695 Hz/cm
    
```

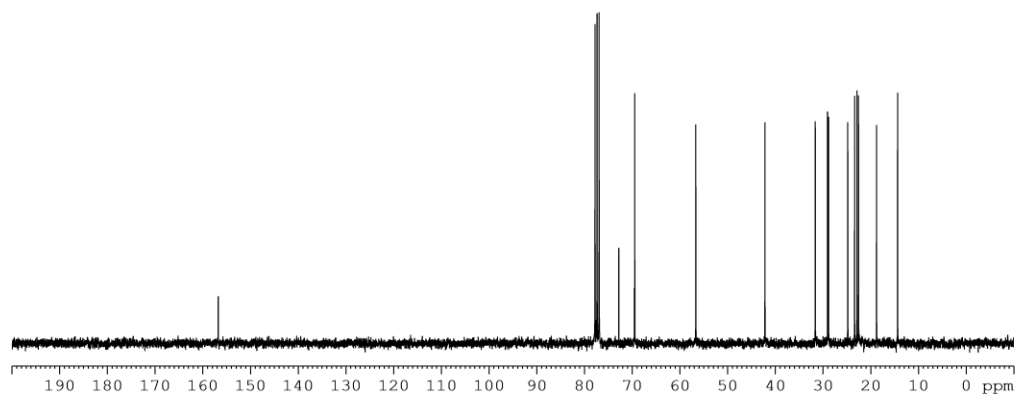

```

Current Data Parameters
NAME      FC12GE028E
EXPNO     10
PROCNO    1

F2 - Acquisition Parameters
Date_     20110326
Time      8.22
INSTRUM   spect
PROBHD    5 mm BBI 1H-BB
PULPROG   zgpg30
TD        65536
SOLVENT   CDCl3
NS        2048
DS        4
SWH        17985.611 Hz
FIDRES     0.274439 Hz
AQ         1.8219508 sec
RG         1625.5
DW         27.800 usec
DE         10.00 usec
TE         293.8 K
D1         2.00000000 sec
d11        0.03000000 sec
DELTA      1.89999998 sec
MCREST     0.00000000 sec
MCWRK      0.01500000 sec

===== CHANNEL f1 =====
NUC1       13C
P1         9.00 usec
PL1        -6.00 dB
SFO1       75.4752953 MHz

===== CHANNEL f2 =====
CPDPRG2   waltz16
NUC2       1H
PCPD2     80.00 usec
PL2        0.00 dB
PL12       22.00 dB
PL13       22.00 dB
SFO2       300.1312005 MHz

F2 - Processing parameters
SI         32768
SF         75.4677243 MHz
WDW        EM
SSB        0
LB         1.00 Hz
GB         0
PC         1.40
    
```

Click-Alkynylation of N- and P- Nucleophiles by Oxidative Cross-Coupling with Alkynylcopper Reagents

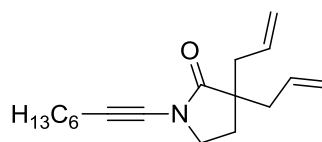

26

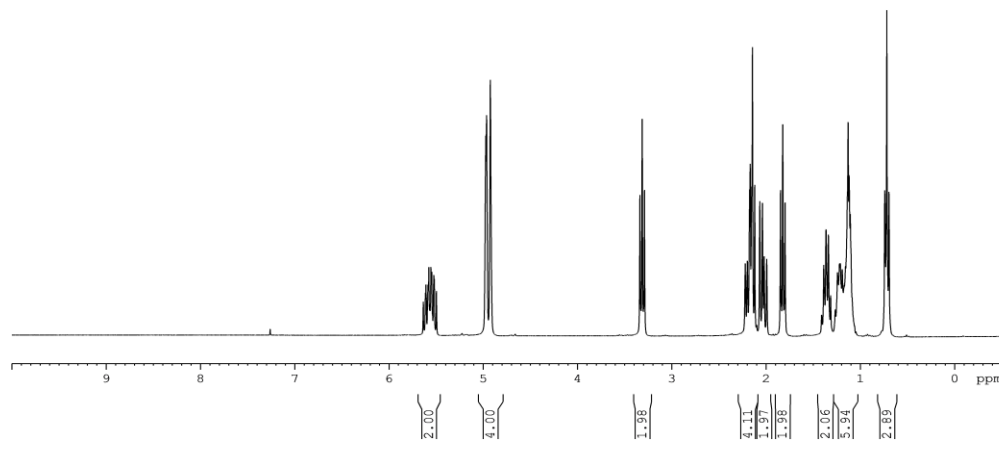

Current Data Parameters  
NAME fc35g106A  
EXPNO 12  
PROCNO 1

F2 - Acquisition Parameters  
Date\_ 20110901  
Time\_ 21.22  
INSTRUM spect  
PROBHD 5 mm BBI 1H-BB  
PULPROG zg30  
TD 32768  
SOLVENT CDCl3  
NS 16  
DS 0  
SWH 6313.131 Hz  
FIDRES 0.192661 Hz  
AQ 2.5952756 sec  
RG 18  
DW 79.200 usec  
DE 6.50 usec  
TE 295.2 K  
D1 1.0000000 sec  
MCREST 0.0000000 sec  
MCWRK 0.0150000 sec

===== CHANNEL f1 =====  
NUC1 1H  
P1 6.20 usec  
PL1 0.00 dB  
SFO1 300.1328512 MHz

F2 - Processing parameters  
SI 32768  
SF 300.1300053 MHz  
WDW EM  
SSB 0  
LB 0.10 Hz  
GB 0  
PC 1.00

1D NMR plot parameters  
CX 20.00 cm  
CY 10.18 cm  
F1P 2.816 ppm  
F1 845.24 Hz  
F2P -0.028 ppm  
F2 -8.42 Hz  
PPMCM 0.14221 ppm/cm  
HZCM 42.68278 Hz/cm

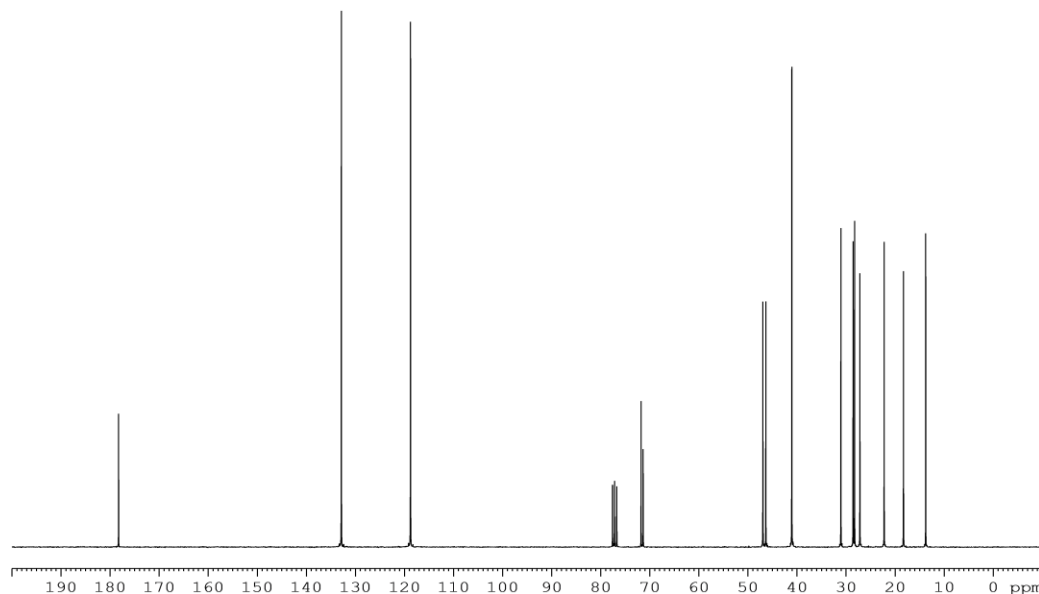

Current Data Parameters  
NAME fc35g106A  
EXPNO 10  
PROCNO 1

F2 - Acquisition Parameters  
Date\_ 20110901  
Time\_ 21.04  
INSTRUM spect  
PROBHD 5 mm BBI 1H-BB  
PULPROG zgpg30  
TD 65536  
SOLVENT CDCl3  
NS 2000  
DS 4  
SWH 17985.611 Hz  
FIDRES 0.274439 Hz  
AQ 1.8219508 sec  
RG 1625.5  
DW 27.800 usec  
DE 10.00 usec  
TE 295.4 K  
D1 2.0000000 sec  
d11 0.0300000 sec  
DELTA 1.89999998 sec  
MCREST 0.0000000 sec  
MCWRK 0.0150000 sec

===== CHANNEL f1 =====  
NUC1 13C  
P1 9.00 usec  
PL1 -6.00 dB  
SFO1 75.4752953 MHz

===== CHANNEL f2 =====  
CPDPRG2 waltz16  
NUC2 1H  
PCPD2 80.00 usec  
PL2 0.00 dB  
PL12 22.00 dB  
PL13 22.00 dB  
SFO2 300.1312005 MHz

F2 - Processing parameters  
SI 32768  
SF 75.4677592 MHz  
WDW EM  
SSB 0  
LB 1.00 Hz  
GB 0  
PC 1.40

1D NMR plot parameters  
CX 20.00 cm  
CY 8.51 cm  
F1P 200.000 ppm  
F1 15093.55 Hz  
F2P -10.000 ppm  
F2 -754.68 Hz  
PPMCM 10.50000 ppm/cm  
HZCM 792.41144 Hz/cm

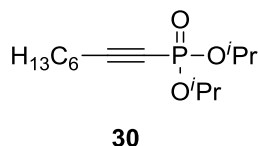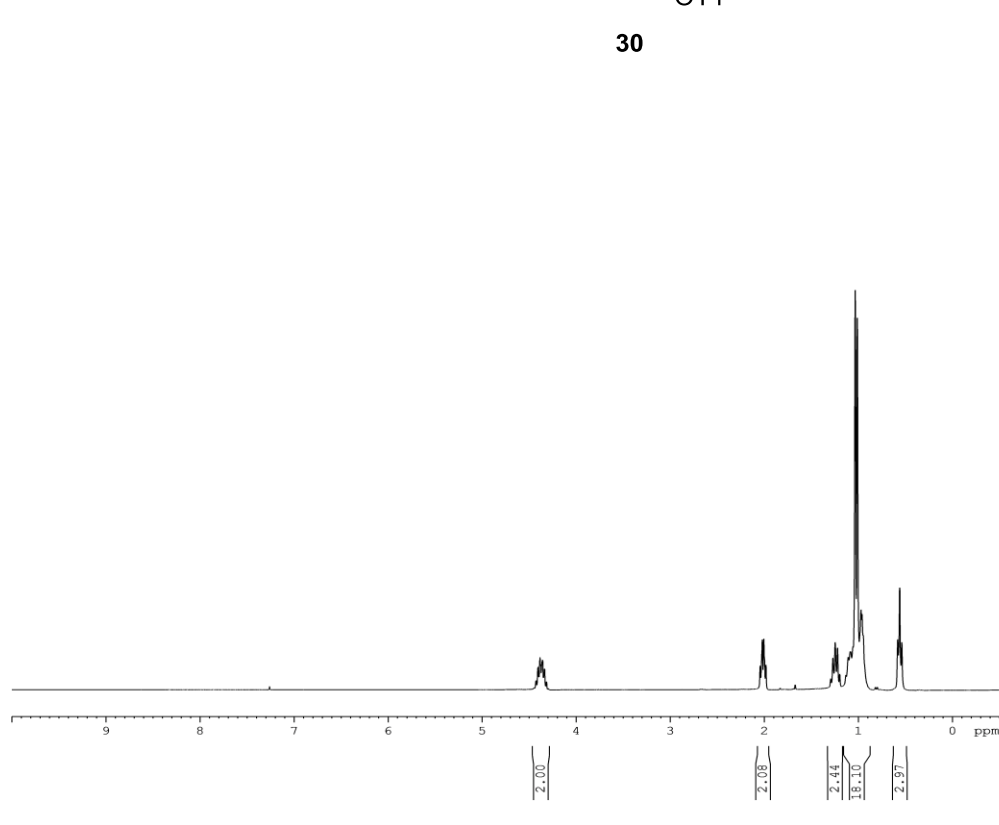

Current Data Parameters  
NAME FC23JH085  
EXPNO 10  
PROCNO 1

F2 - Acquisition Parameters  
Date\_ 20110611  
Time\_ 21.47  
INSTRUM spect  
PROBHD 5 mm BBI 1H-BB  
PULPROG zg30  
TD 32768  
SOLVENT CDC13  
NS 16  
DS 0  
SWH 6313.131 Hz  
FIDRES 0.192661 Hz  
AQ 2.5952756 sec  
RG 16  
DW 79.200 usec  
DE 6.50 usec  
TE 294.1 K  
D1 1.00000000 sec  
MCREST 0.00000000 sec  
MCWRK 0.01500000 sec

===== CHANNEL f1 =====  
NUC1 1H  
P1 6.20 usec  
PL1 0.00 dB  
SFO1 300.1328512 MHz

F2 - Processing parameters  
SI 32768  
SF 300.1300051 MHz  
WDW EM  
SSB 0  
LB 0.10 Hz  
GB 0  
PC 1.00

1D NMR plot parameters  
CX 20.00 cm  
CY 12.50 cm  
F1P 1.345 ppm  
F1 403.56 Hz  
F2P 0.465 ppm  
F2 139.62 Hz  
PPMCM 0.04397 ppm/cm  
HZCM 13.19710 Hz/cm

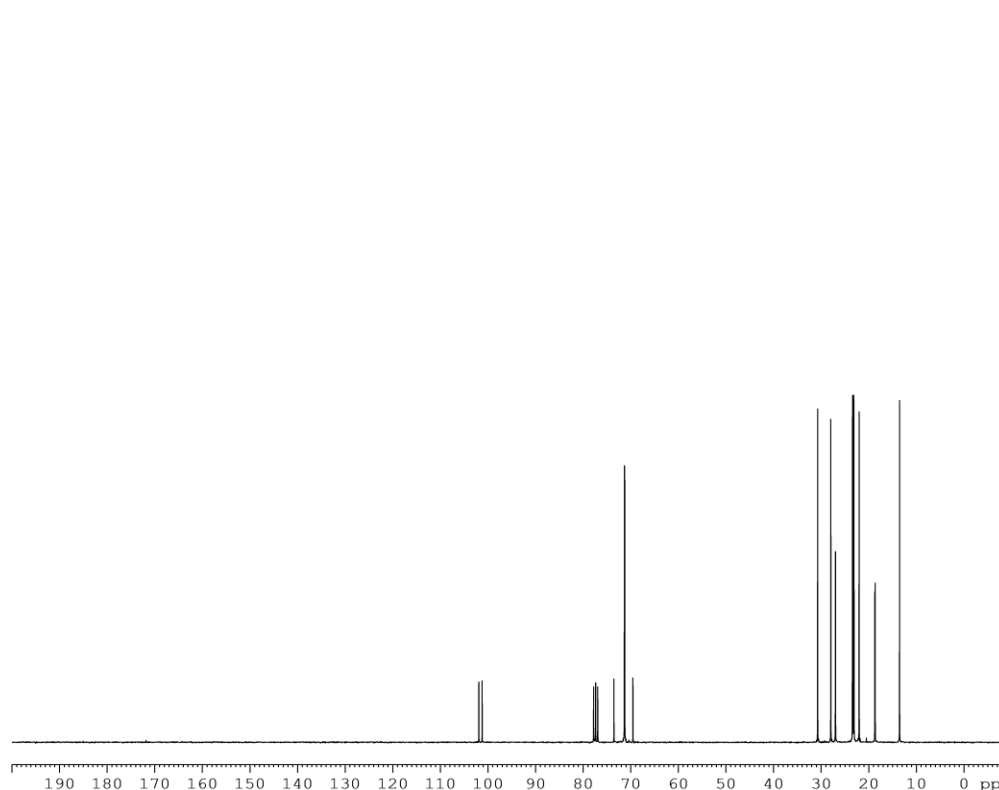

Current Data Parameters  
NAME FC23JH085  
EXPNO 11  
PROCNO 1

F2 - Acquisition Parameters  
Date\_ 20110611  
Time\_ 22.54  
INSTRUM spect  
PROBHD 5 mm BBI 1H-BB  
PULPROG zgpg30  
TD 65536  
SOLVENT CDC13  
NS 1024  
DS 4  
SWH 17985.611 Hz  
FIDRES 0.274439 Hz  
AQ 1.8219508 sec  
RG 1625.5  
DW 27.800 usec  
DE 10.00 usec  
TE 294.4 K  
D1 2.00000000 sec  
d11 0.03000000 sec  
DELTA 1.89999998 sec  
MCREST 0.00000000 sec  
MCWRK 0.01500000 sec

===== CHANNEL f1 =====  
NUC1 13C  
P1 9.00 usec  
PL1 -6.00 dB  
SFO1 75.4752953 MHz

===== CHANNEL f2 =====  
CPDPRG2 waltz16  
NUC2 1H  
PCPD2 80.00 usec  
PL2 0.00 dB  
PL12 22.00 dB  
PL13 22.00 dB  
SFO2 300.1312005 MHz

F2 - Processing parameters  
SI 32768  
SF 75.4677556 MHz  
WDW EM  
SSB 0  
LB 1.00 Hz  
GB 0  
PC 1.40

Click-Alkynylation of N- and P- Nucleophiles by Oxidative Cross-Coupling with Alkynylcopper Reagents

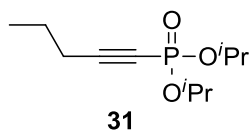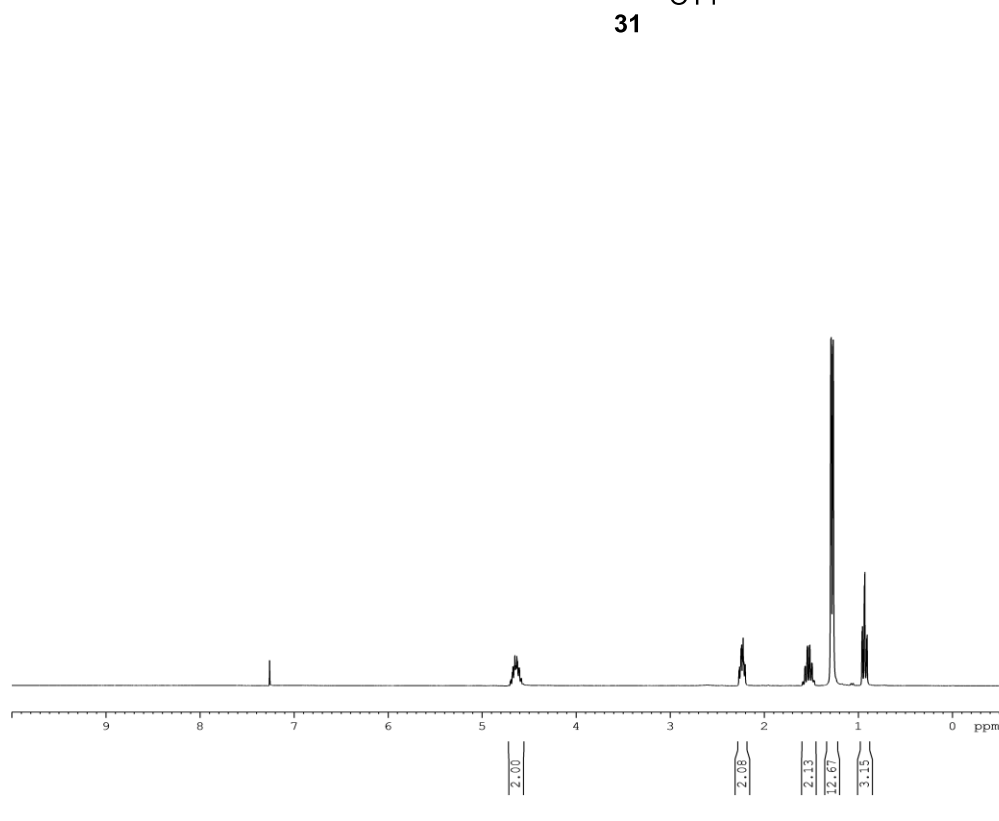

```
Current Data Parameters
NAME      FC19KJ493E
EXPNO     10
PROCNO    1

F2 - Acquisition Parameters
Date_     20110516
Time      0.02
INSTRUM   spect
PROBHD    5 mm BBI 1H-BB
PULPROG   zg30
TD         32768
SOLVENT   CDC13
NS         16
DS         0
SWH        6313.131 Hz
FIDRES     0.192661 Hz
AQ         2.5952756 sec
RG         45.3
DW         79.200 usec
DE         6.50 usec
TE         293.3 K
D1         1.00000000 sec
MCREST    0.00000000 sec
MCWRK     0.01500000 sec

===== CHANNEL f1 =====
NUC1       1H
P1         6.20 usec
PL1        0.00 dB
SFO1       300.1328512 MHz

F2 - Processing parameters
SI         32768
SF         300.1300059 MHz
WDW        EM
SSB        0
LB         0.10 Hz
GB         0
PC         1.00

1D NMR plot parameters
CX         20.00 cm
CY         12.50 cm
F1P        2.363 ppm
F1         709.35 Hz
F2P        0.765 ppm
F2         229.73 Hz
PEMCM      0.07990 ppm/cm
HZCM       23.98110 Hz/cm
```

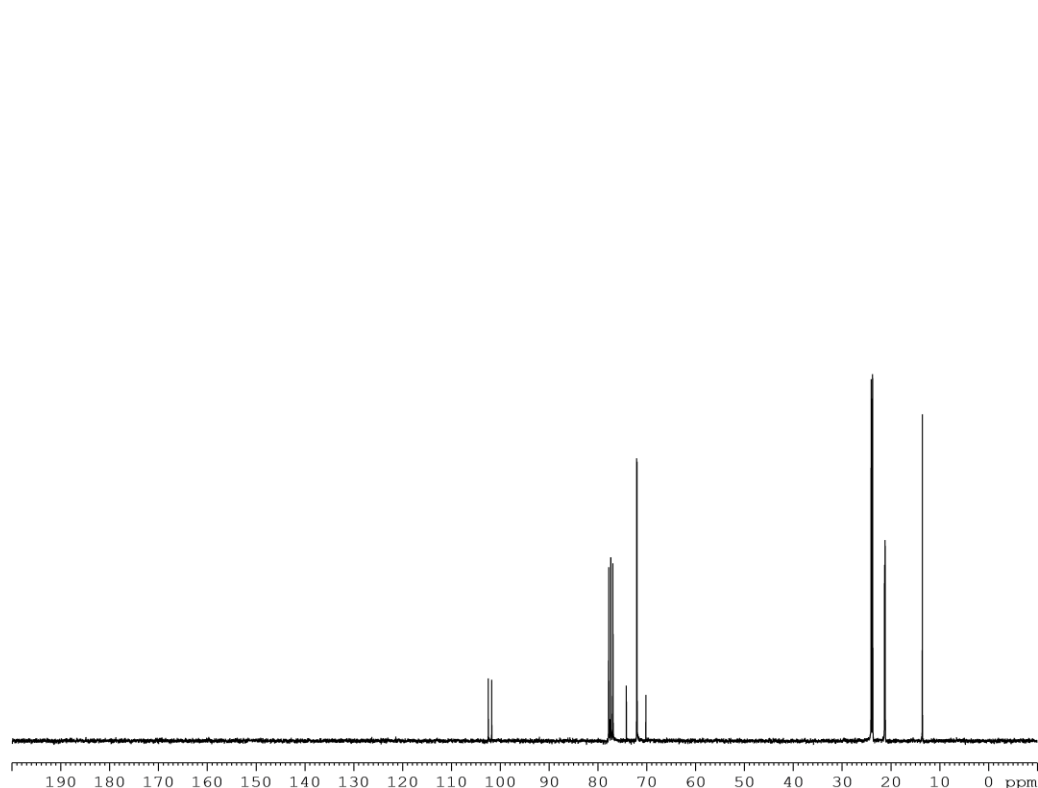

```
Current Data Parameters
NAME      FC19KJ493E
EXPNO     11
PROCNO    1

F2 - Acquisition Parameters
Date_     20110516
Time      1.10
INSTRUM   spect
PROBHD    5 mm BBI 1H-BB
PULPROG   zgpg30
TD         65536
SOLVENT   CDC13
NS         1024
DS         4
SWH        17985.611 Hz
FIDRES     0.274439 Hz
AQ         1.8219508 sec
RG         1625.5
DW         27.800 usec
DE         10.00 usec
TE         293.5 K
D1         2.00000000 sec
d11        0.03000000 sec
DELTA      1.89999998 sec
MCREST    0.00000000 sec
MCWRK     0.01500000 sec

===== CHANNEL f1 =====
NUC1       13C
P1         9.00 usec
PL1        -6.00 dB
SFO1       75.4752953 MHz

===== CHANNEL f2 =====
CPDPRG2   waltz16
NUC2       1H
PCPD2     80.00 usec
PL2        0.00 dB
PL12       22.00 dB
PL13       22.00 dB
SFO2       300.1312005 MHz

F2 - Processing parameters
SI         32768
SF         75.4677309 MHz
WDW        EM
SSB        0
LB         1.00 Hz
GB         0
PC         1.40

1D NMR plot parameters
CX         20.00 cm
CY         12.50 cm
F1P        200.000 ppm
F1         15093.55 Hz
F2P        -10.000 ppm
F2         -754.68 Hz
PEMCM      10.50000 ppm/cm
HZCM       792.41113 Hz/cm
```



Click-Alkynylation of N- and P- Nucleophiles by Oxidative Cross-Coupling with Alkynylcopper Reagents

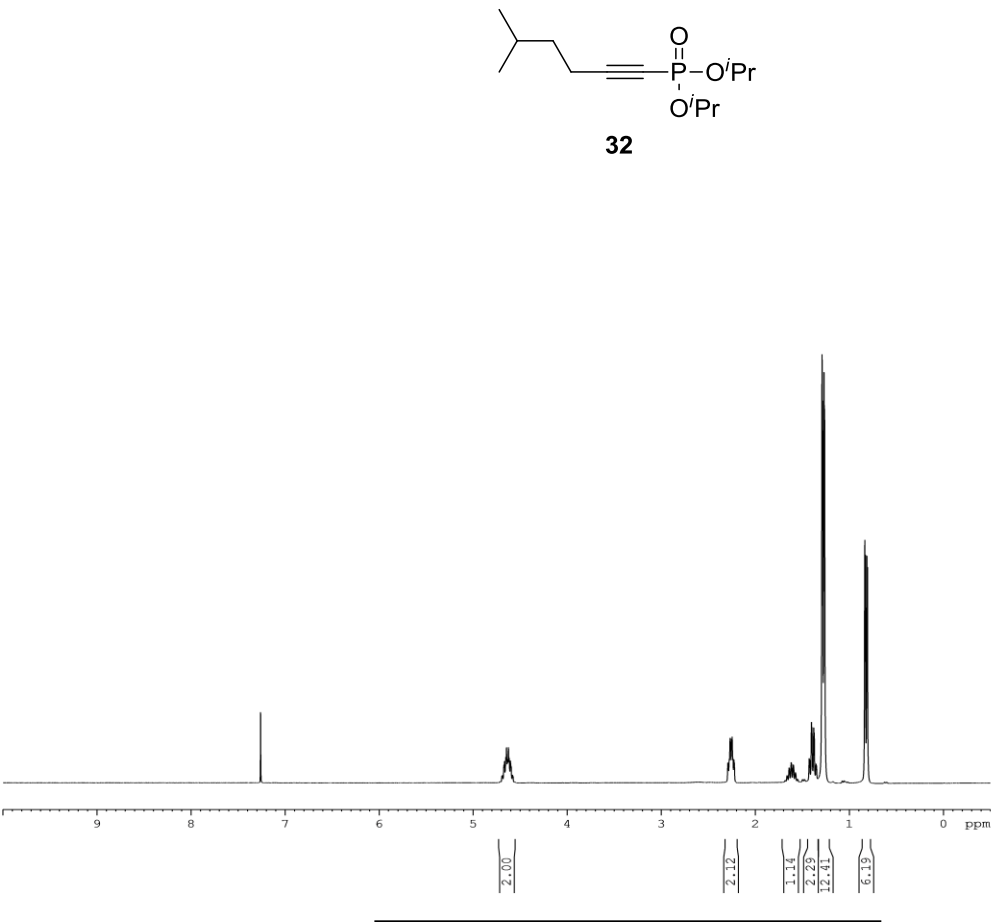

Current Data Parameters  
NAME FC19KJ439C  
EXPNO 10  
PROCNO 1

F2 - Acquisition Parameters  
Date\_ 20110516  
Time\_ 3.54  
INSTRUM spect  
PROBHD 5 mm BBI 1H-BB  
PULPROG zg30  
TD 32768  
SOLVENT CDC13  
NS 16  
DS 0  
SWH 6313.131 Hz  
FIDRES 0.192661 Hz  
AQ 2.5952756 sec  
RG 40.3  
DW 79.200 usec  
DE 6.50 usec  
TE 293.1 K  
D1 1.00000000 sec  
MCREST 0.00000000 sec  
MCWRK 0.01500000 sec

===== CHANNEL f1 =====  
NUC1 1H  
P1 6.20 usec  
PL1 0.00 dB  
SFO1 300.1328512 MHz

F2 - Processing parameters  
SI 32768  
SF 300.1300059 MHz  
WDW EM  
SSB 0  
LB 0.10 Hz  
GB 0  
PC 1.00

1D NMR plot parameters  
CX 20.00 cm  
CY 12.50 cm  
F1P 2.443 ppm  
F1 733.35 Hz  
F2P 0.640 ppm  
F2 192.13 Hz  
PPMCM 0.09016 ppm/cm  
HZCM 27.06114 Hz/cm

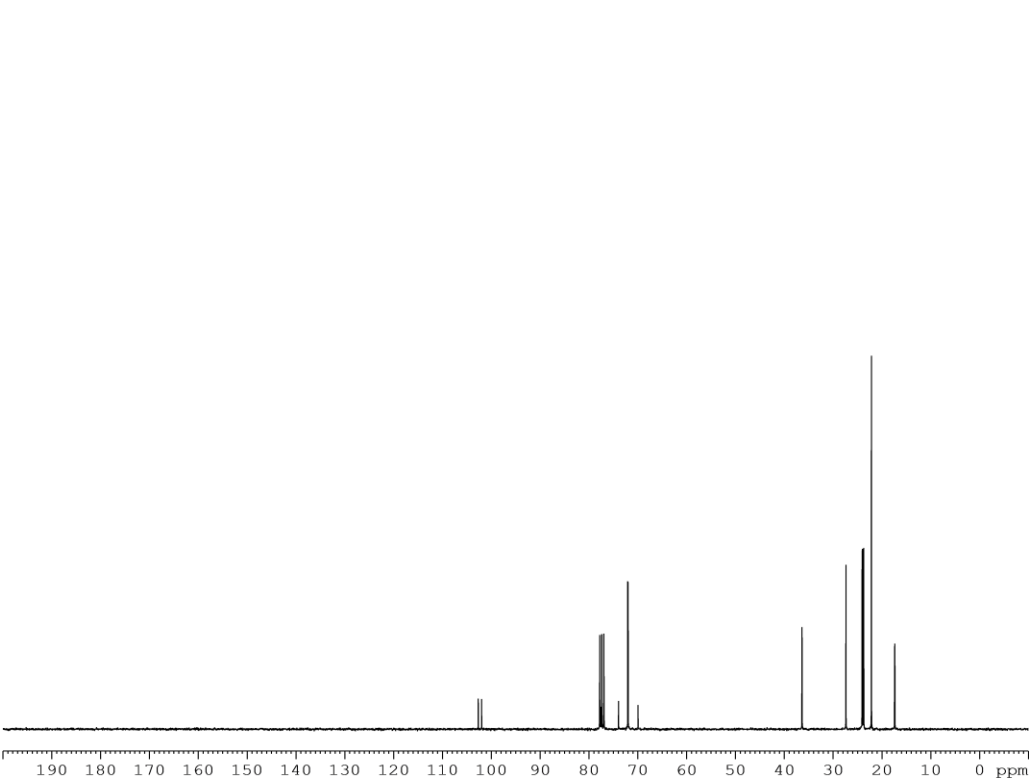

Current Data Parameters  
NAME FC19KJ439C  
EXPNO 11  
PROCNO 1

F2 - Acquisition Parameters  
Date\_ 20110516  
Time\_ 5.03  
INSTRUM spect  
PROBHD 5 mm BBI 1H-BB  
PULPROG zgpg30  
TD 65536  
SOLVENT CDC13  
NS 1024  
DS 4  
SWH 17985.611 Hz  
FIDRES 0.274439 Hz  
AQ 1.8219508 sec  
RG 1824.6  
DW 27.800 usec  
DE 10.00 usec  
TE 293.3 K  
D1 2.00000000 sec  
d11 0.03000000 sec  
DELTA 1.89999998 sec  
MCREST 0.00000000 sec  
MCWRK 0.01500000 sec

===== CHANNEL f1 =====  
NUC1 13C  
P1 9.00 usec  
PL1 -6.00 dB  
SFO1 75.4752953 MHz

===== CHANNEL f2 =====  
CPDPRG2 waltz16  
NUC2 1H  
PCPD2 80.00 usec  
PL2 0.00 dB  
PL12 22.00 dB  
PL13 22.00 dB  
SFO2 300.1312005 MHz

F2 - Processing parameters  
SI 32768  
SF 75.4677309 MHz  
WDW EM  
SSB 0  
LB 1.00 Hz  
GB 0  
PC 1.40

1D NMR plot parameters  
CX 20.00 cm  
CY 12.50 cm  
F1P 200.000 ppm  
F1 15093.55 Hz  
F2P -10.000 ppm  
F2 -754.68 Hz  
PPMCM 10.50000 ppm/cm  
HZCM 792.41113 Hz/cm

Click-Alkynylation of N- and P- Nucleophiles by Oxidative Cross-Coupling with Alkynylcopper Reagents

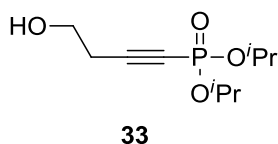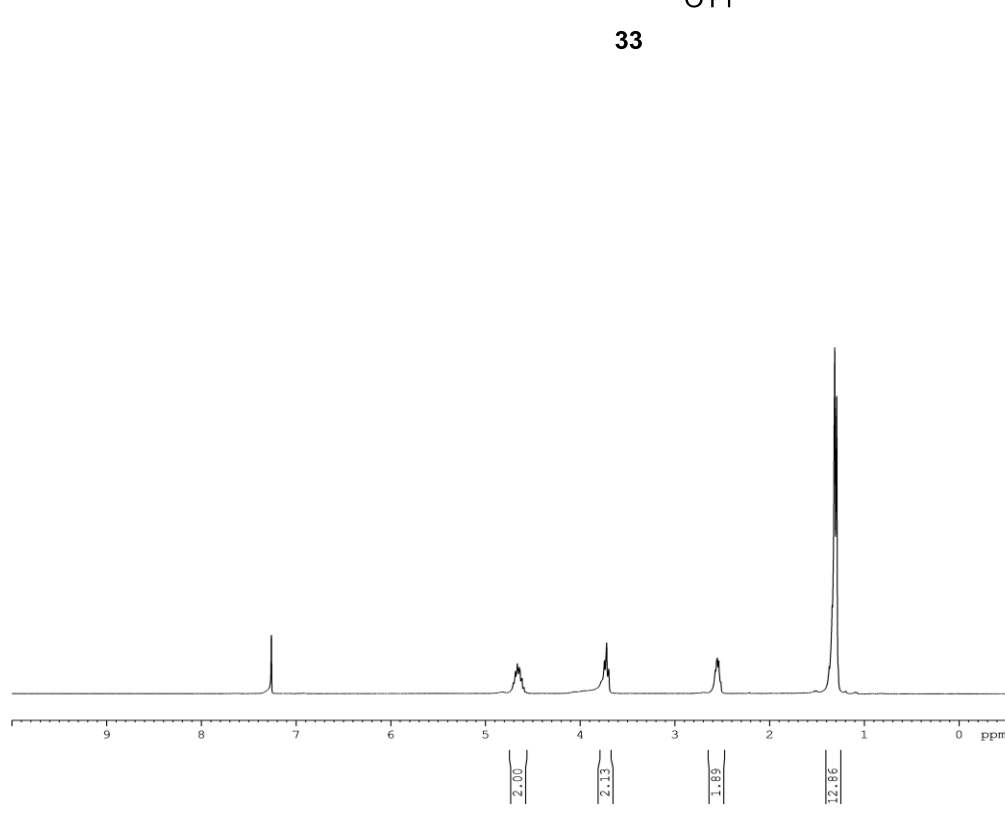

Current Data Parameters  
NAME FC23KJ493D  
EXPNO 10  
PROCNO 1

F2 - Acquisition Parameters  
Date\_ 20110611  
Time 1.28  
INSTRUM spect  
PROBHD 5 mm BBI 1H-BB  
PULPROG zg30  
TD 32768  
SOLVENT CDCl3  
NS 16  
DS 0  
SWH 6313.131 Hz  
FIDRES 0.192661 Hz  
AQ 2.5952756 sec  
RG 57  
DW 79.200 usec  
DE 6.50 usec  
TE 294.1 K  
D1 1.00000000 sec  
MCREST 0.00000000 sec  
MCWRK 0.01500000 sec

CHANNEL f1  
NUC1 1H  
P1 6.20 usec  
PL1 0.00 dB  
SFO1 300.1328512 MHz

F2 - Processing parameters  
SI 32768  
SF 300.1300049 MHz  
WDW EM  
SSB 0  
LB 0.10 Hz  
GB 0  
PC 1.00

1D NMR plot parameters  
CX 20.00 cm  
CY 12.50 cm  
F1P 10.000 ppm  
F1 3001.30 Hz  
F2P -0.500 ppm  
F2 -150.06 Hz  
PPMCM 0.52500 ppm/cm  
HZCM 157.56825 Hz/cm

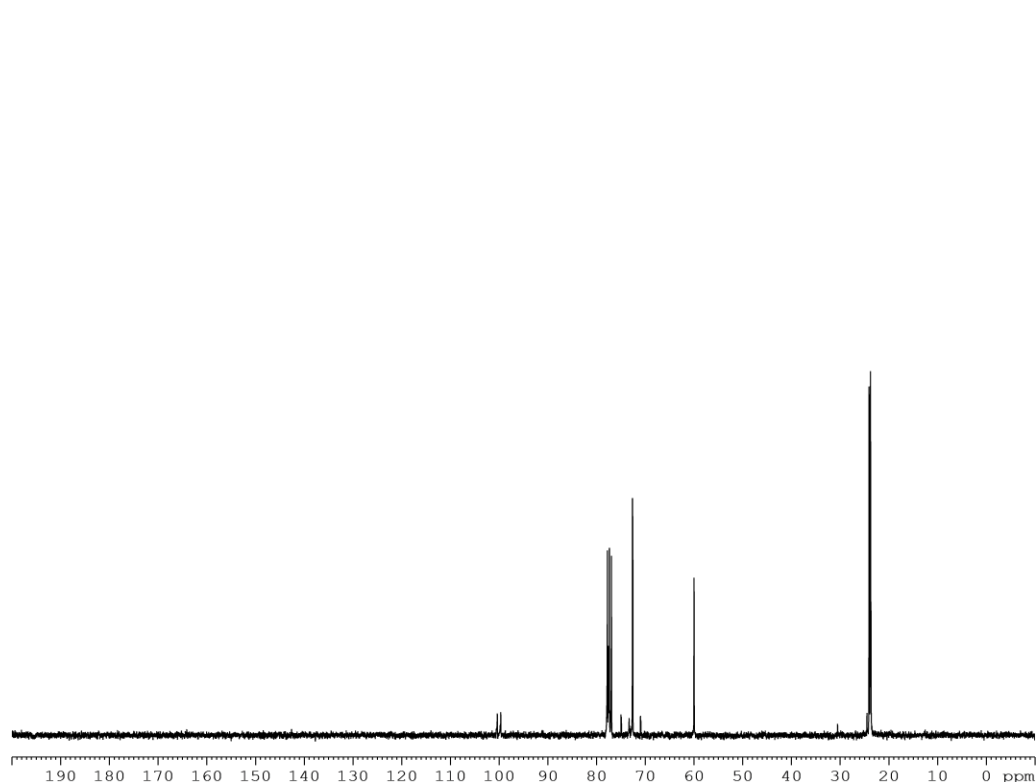

Current Data Parameters  
NAME FC23KJ493D  
EXPNO 11  
PROCNO 1

F2 - Acquisition Parameters  
Date\_ 20110611  
Time 2.35  
INSTRUM spect  
PROBHD 5 mm BBI 1H-BB  
PULPROG zgpg30  
TD 65536  
SOLVENT CDCl3  
NS 1024  
DS 4  
SWH 17985.611 Hz  
FIDRES 0.274439 Hz  
AQ 1.8219508 sec  
RG 1625.5  
DW 27.800 usec  
DE 10.00 usec  
TE 294.3 K  
D1 2.00000000 sec  
d11 0.03000000 sec  
DELTA 1.89999998 sec  
MCREST 0.00000000 sec  
MCWRK 0.01500000 sec

CHANNEL f1  
NUC1 13C  
P1 9.00 usec  
PL1 -6.00 dB  
SFO1 75.4752953 MHz

CHANNEL f2  
CPDPRG2 waltz16  
NUC2 1H  
PCPD2 80.00 usec  
PL2 0.00 dB  
PL12 22.00 dB  
PL13 22.00 dB  
SFO2 300.1312005 MHz

F2 - Processing parameters  
SI 32768  
SF 75.4677293 MHz  
WDW EM  
SSB 0  
LB 1.00 Hz  
GB 0  
PC 1.40

1D NMR plot parameters  
CX 20.00 cm  
CY 12.50 cm  
F1P 200.000 ppm  
F1 15093.55 Hz  
F2P -10.000 ppm  
F2 -754.68 Hz  
PPMCM 10.50000 ppm/cm  
HZCM 792.41113 Hz/cm

Click-Alkynylation of N- and P- Nucleophiles by Oxidative Cross-Coupling with Alkynylcopper Reagents

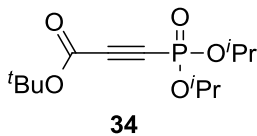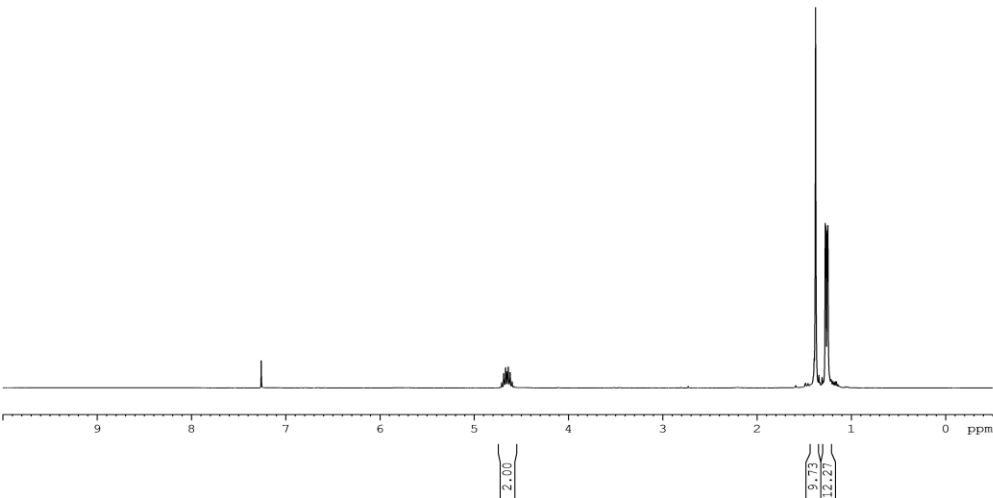

Current Data Parameters  
NAME FC21JH070  
EXPNO 10  
PROCNO 1

F2 - Acquisition Parameters  
Date\_ 20110528  
Time 5.51  
INSTRUM spect  
PROBHD 5 mm BBI 1H-BB  
PULPROG zg30  
TD 32768  
SOLVENT CDCl3  
NS 16  
DS 0  
SWH 6313.131 Hz  
FIDRES 0.192661 Hz  
AQ 2.5952756 sec  
RG 28.5  
DW 79.200 usec  
DE 6.50 usec  
TE 293.6 K  
D1 1.00000000 sec  
MCREST 0.00000000 sec  
MCWRK 0.01500000 sec

===== CHANNEL f1 =====  
NUC1 1H  
P1 6.20 usec  
PL1 0.00 dB  
SFO1 300.1328512 MHz

F2 - Processing parameters  
SI 32768  
SF 300.1300055 MHz  
WDW EM  
SSB 0  
LB 0.10 Hz  
GB 0  
PC 1.00

1D NMR plot parameters  
CX 20.00 cm  
CY 12.50 cm  
F1P 1.665 ppm  
F1 499.59 Hz  
F2P 0.995 ppm  
F2 298.59 Hz  
PPMCM 0.03349 ppm/cm  
HZCM 10.04991 Hz/cm

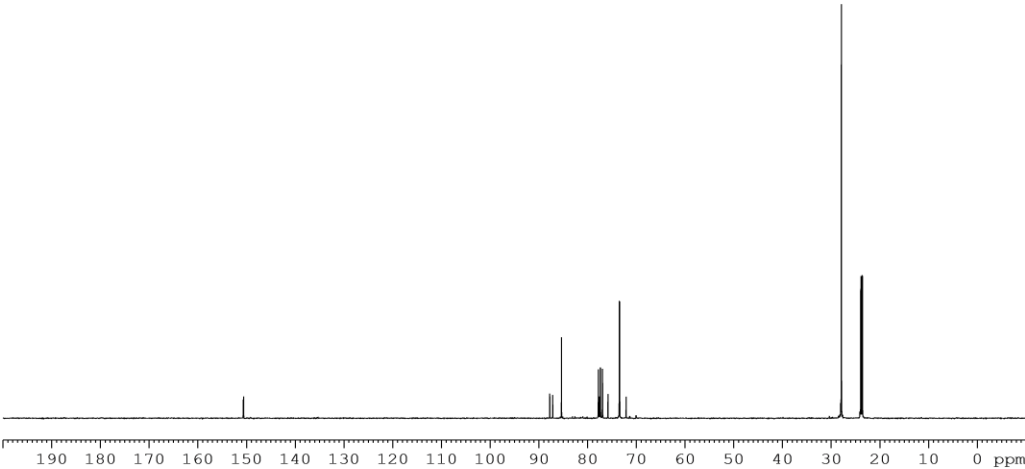

Current Data Parameters  
NAME FC21JH070  
EXPNO 11  
PROCNO 1

F2 - Acquisition Parameters  
Date\_ 20110528  
Time 6.43  
INSTRUM spect  
PROBHD 5 mm BBI 1H-BB  
PULPROG zgpg30  
TD 65536  
SOLVENT CDCl3  
NS 768  
DS 4  
SWH 17985.611 Hz  
FIDRES 0.274439 Hz  
AQ 1.8219508 sec  
RG 1625.5  
DW 27.800 usec  
DE 10.00 usec  
TE 293.8 K  
D1 2.00000000 sec  
d11 0.03000000 sec  
DELTA 1.89999998 sec  
MCREST 0.00000000 sec  
MCWRK 0.01500000 sec

===== CHANNEL f1 =====  
NUC1 13C  
P1 9.00 usec  
PL1 -6.00 dB  
SFO1 75.4752953 MHz

===== CHANNEL f2 =====  
CPDPRG2 waltz16  
NUC2 1H  
PCPD2 80.00 usec  
PL2 0.00 dB  
PL12 22.00 dB  
PL13 22.00 dB  
SFO2 300.1312005 MHz

F2 - Processing parameters  
SI 32768  
SF 75.4677353 MHz  
WDW EM  
SSB 0  
LB 1.00 Hz  
GB 0  
PC 1.40

1D NMR plot parameters  
CX 20.00 cm  
CY 12.50 cm  
F1P 200.000 ppm  
F1 15093.55 Hz  
F2P -10.000 ppm  
F2 -754.68 Hz  
PPMCM 10.50000 ppm/cm  
HZCM 792.41119 Hz/cm

Click-Alkynylation of N- and P- Nucleophiles by Oxidative Cross-Coupling with Alkynylcopper Reagents

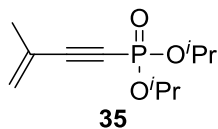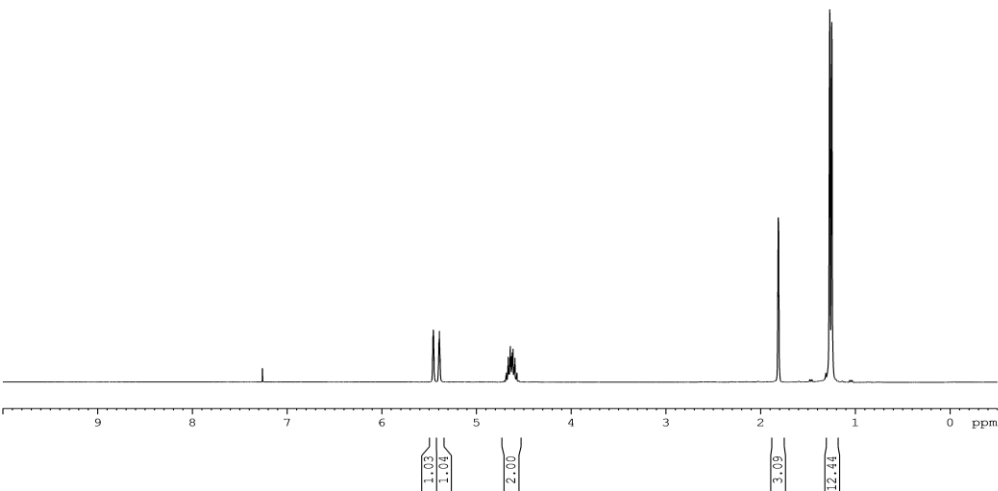

Current Data Parameters  
NAME FC19KJ496A  
EXPNO 10  
PROCNO 1

F2 - Acquisition Parameters  
Date\_ 20110513  
Time 18.45  
INSTRUM spect  
PROBHD 5 mm BBI 1H-BB  
PULPROG zg30  
TD 32768  
SOLVENT CDCl3  
NS 16  
DS 0  
SWH 6313.131 Hz  
FIDRES 0.192661 Hz  
AQ 2.5952756 sec  
RG 35.9  
DW 79.200 usec  
DE 6.50 usec  
TE 293.9 K  
D1 1.00000000 sec  
MCREST 0.00000000 sec  
MCWRK 0.01500000 sec

===== CHANNEL f1 =====  
NUC1 1H  
P1 6.20 usec  
PL1 0.00 dB  
SFO1 300.1328512 MHz

F2 - Processing parameters  
SI 32768  
SF 300.1300059 MHz  
WDW EM  
SSB 0  
LB 0.10 Hz  
GB 0  
PC 1.00

1D NMR plot parameters  
CX 20.00 cm  
CY 12.50 cm  
FLP 2.213 ppm  
F1 664.16 Hz  
F2P 0.928 ppm  
F2 278.55 Hz  
PPMCM 0.06424 ppm/cm  
HZCM 19.28017 Hz/cm

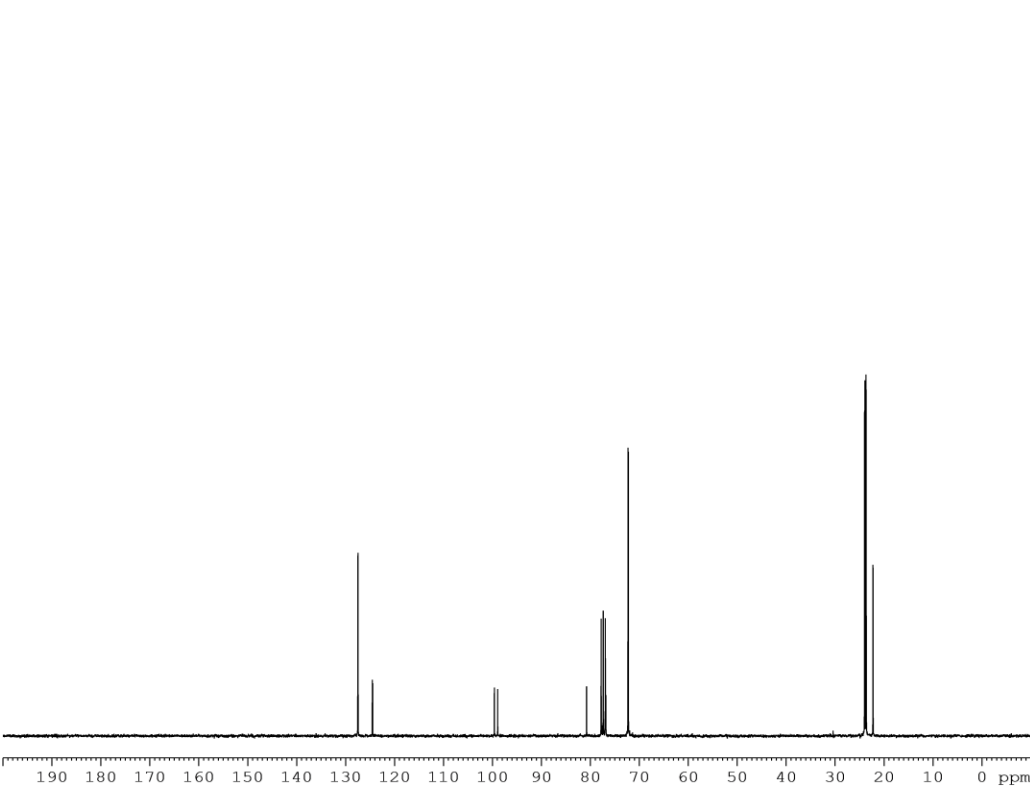

Current Data Parameters  
NAME FC19KJ496A  
EXPNO 11  
PROCNO 1

F2 - Acquisition Parameters  
Date\_ 20110513  
Time 19.53  
INSTRUM spect  
PROBHD 5 mm BBI 1H-BB  
PULPROG zgpg30  
TD 65536  
SOLVENT CDCl3  
NS 1024  
DS 4  
SWH 17985.611 Hz  
FIDRES 0.274439 Hz  
AQ 1.8219508 sec  
RG 1625.5  
DW 27.800 usec  
DE 10.00 usec  
TE 294.0 K  
D1 2.00000000 sec  
d11 0.03000000 sec  
DELTA 1.89999998 sec  
MCREST 0.00000000 sec  
MCWRK 0.01500000 sec

===== CHANNEL f1 =====  
NUC1 13C  
P1 9.00 usec  
PL1 -6.00 dB  
SFO1 75.4752953 MHz

===== CHANNEL f2 =====  
CPDPRG2 waltz16  
NUC2 1H  
PCPD2 80.00 usec  
PL2 0.00 dB  
PL12 22.00 dB  
PL13 22.00 dB  
SFO2 300.1312005 MHz

F2 - Processing parameters  
SI 32768  
SF 75.4677342 MHz  
WDW EM  
SSB 0  
LB 1.00 Hz  
GB 0  
PC 1.40

1D NMR plot parameters  
CX 20.00 cm  
CY 12.50 cm  
FLP 200.000 ppm  
F1 15093.55 Hz  
F2P -10.000 ppm  
F2 -754.68 Hz  
PPMCM 10.50000 ppm/cm  
HZCM 792.41119 Hz/cm

Click-Alkynylation of N- and P- Nucleophiles by Oxidative Cross-Coupling with Alkynylcopper Reagents

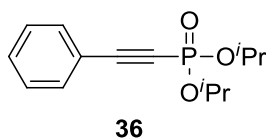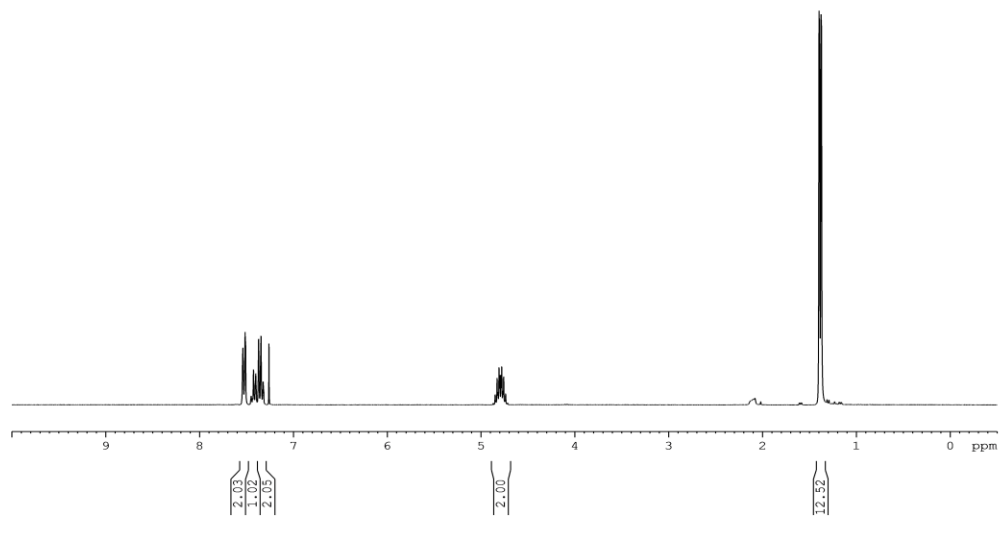

```
Current Data Parameters
NAME      FC19KJ493A
EXPNO     10
PROCNO    1

F2 - Acquisition Parameters
Date_     20110516
Time      5.51
INSTRUM   spect
PROBHD    5 mm BBI 1H-BB
PULPROG   zg30
TD         32768
SOLVENT   CDCl3
NS         16
DS         0
SWH        6313.131 Hz
FIDRES     0.192661 Hz
AQ         2.5952756 sec
RG         90.5
DW         79.200 usec
DE         6.50 usec
TE         293.1 K
D1         1.00000000 sec
MCREST     0.00000000 sec
MCWRK     0.01500000 sec

===== CHANNEL f1 =====
NUC1       1H
P1         6.20 usec
PL1        0.00 dB
SFO1       300.1328512 MHz

F2 - Processing parameters
SI         32768
SF         300.1300059 MHz
WDW        EM
SSB        0
LB         0.10 Hz
GB         0
PC         1.00

1D NMR plot parameters
CX         20.00 cm
CY         12.50 cm
F1P        1.544 ppm
F1         463.35 Hz
F2P        1.220 ppm
F2         366.13 Hz
PPMCM      0.01620 ppm/cm
HZCM       4.86100 Hz/cm
```

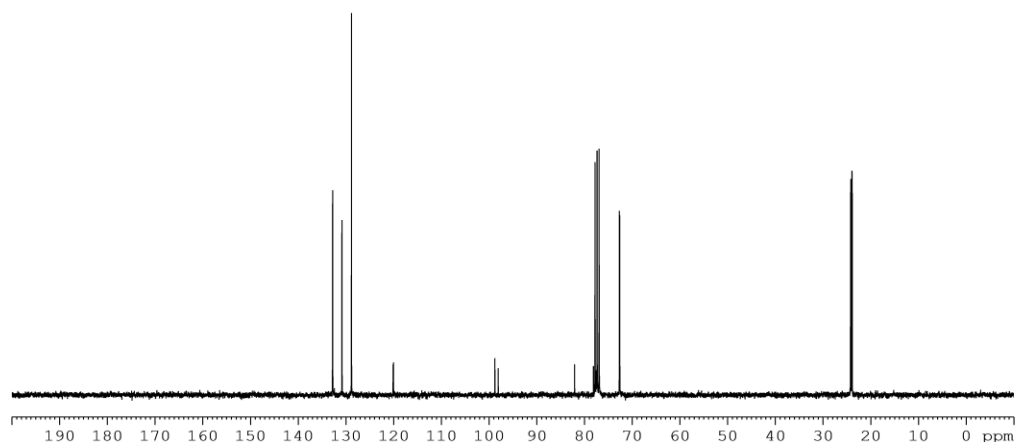

```
Current Data Parameters
NAME      FC19KJ493A
EXPNO     11
PROCNO    1

F2 - Acquisition Parameters
Date_     20110516
Time      7.00
INSTRUM   spect
PROBHD    5 mm BBI 1H-BB
PULPROG   zgpg30
TD         65536
SOLVENT   CDCl3
NS         1024
DS         4
SWH        17985.611 Hz
FIDRES     0.274439 Hz
AQ         1.8219508 sec
RG         1824.6
DW         27.800 usec
DE         10.00 usec
TE         293.3 K
D1         2.00000000 sec
d11        0.03000000 sec
DELTA     1.89999998 sec
MCREST     0.00000000 sec
MCWRK     0.01500000 sec

===== CHANNEL f1 =====
NUC1       13C
P1         9.00 usec
PL1        -6.00 dB
SFO1       75.4752953 MHz

===== CHANNEL f2 =====
CPDPRG2   waltz16
NUC2       1H
PCPD2      80.00 usec
PL2        0.00 dB
PL12       22.00 dB
PL13       22.00 dB
SFO2       300.1312005 MHz

F2 - Processing parameters
SI         32768
SF         75.4677276 MHz
WDW        EM
SSB        0
LB         1.00 Hz
GB         0
PC         1.40
```

Click-Alkynylation of N- and P- Nucleophiles by Oxidative Cross-Coupling with Alkynylcopper Reagents

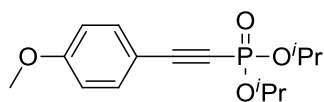

37

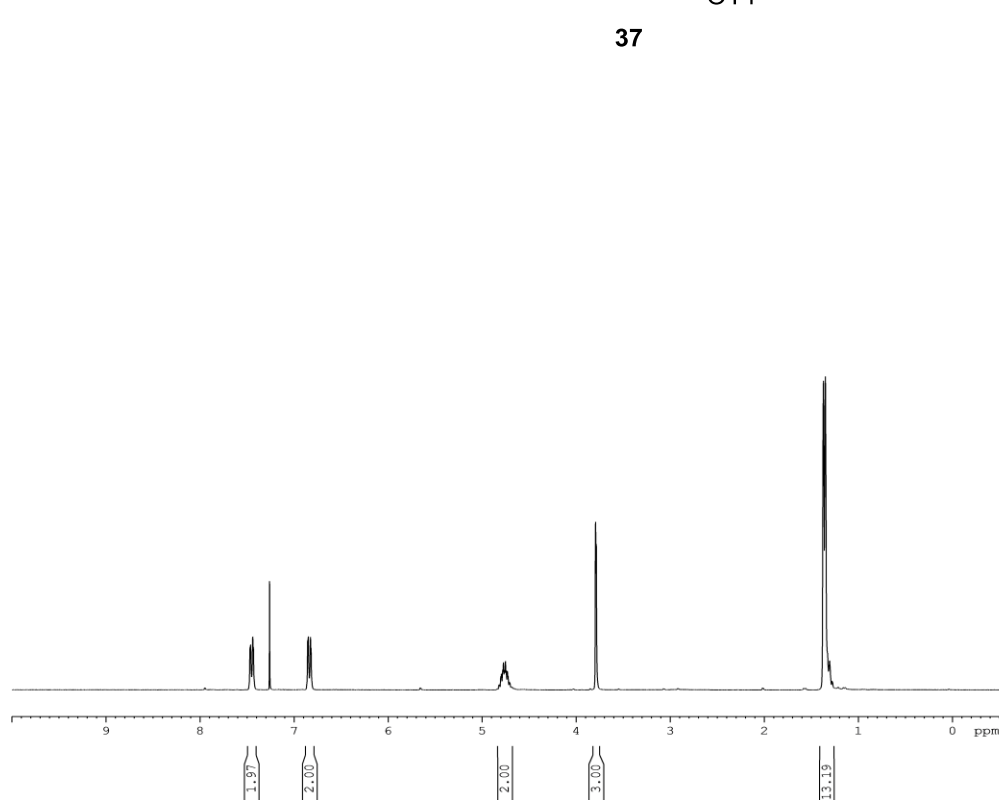

```
Current Data Parameters
NAME      FC19KJ493B
EXPNO     10
PROCNO    1

F2 - Acquisition Parameters
Date_     20110514
Time      18.50
INSTRUM   spect
PROBHD    5 mm BBI 1H-BB
PULPROG   zg30
TD         32768
SOLVENT   CDC13
NS         16
DS         0
SWH        6313.131 Hz
FIDRES     0.192661 Hz
AQ         2.5952736 sec
RG         64
DW         79.200 usec
DE         6.50 usec
TE         293.5 K
D1         1.00000000 sec
MCREST     0.00000000 sec
MCWRK     0.01500000 sec

===== CHANNEL f1 =====
NUC1       1H
P1         6.20 usec
PL1        0.00 dB
SFO1       300.1328512 MHz

F2 - Processing parameters
SI         32768
SF         300.1300059 MHz
WDW        EM
SSB        0
LB         0.10 Hz
GB         0
PC         1.00

1D NMR plot parameters
CX         20.00 cm
CY         12.50 cm
F1P        2.316 ppm
F1         695.19 Hz
F2P        0.995 ppm
F2         298.51 Hz
PPMCM      0.06608 ppm/cm
HZCM       19.83381 Hz/cm
```

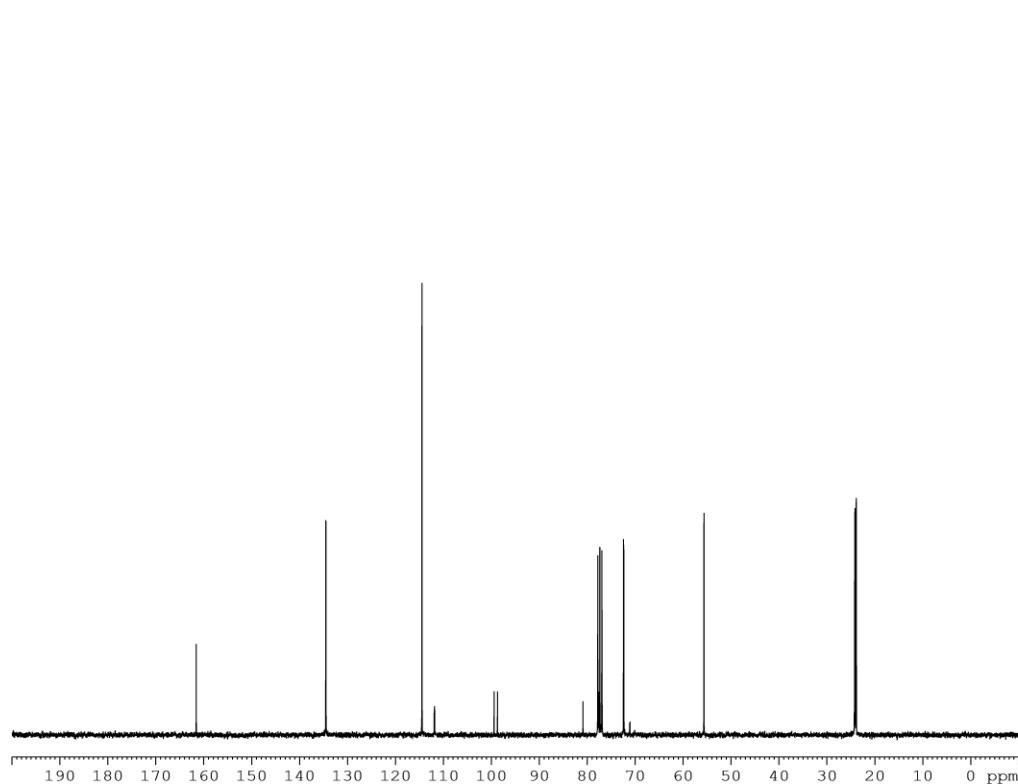

```
Current Data Parameters
NAME      FC19KJ493B
EXPNO     11
PROCNO    1

F2 - Acquisition Parameters
Date_     20110514
Time      19.59
INSTRUM   spect
PROBHD    5 mm BBI 1H-BB
PULPROG   zgpg30
TD         65536
SOLVENT   CDC13
NS         1024
DS         4
SWH        17985.611 Hz
FIDRES     0.274439 Hz
AQ         1.8219508 sec
RG         1625.5
DW         27.800 usec
DE         10.00 usec
TE         293.8 K
D1         2.00000000 sec
d11        0.03000000 sec
DELTA      1.89999998 sec
MCREST     0.00000000 sec
MCWRK     0.01500000 sec

===== CHANNEL f1 =====
NUC1       13C
P1         9.00 usec
PL1        -6.00 dB
SFO1       75.4752953 MHz

===== CHANNEL f2 =====
CPDPRG2   waltz16
NUC2       1H
PCPD2      80.00 usec
PL2        0.00 dB
PL12       22.00 dB
PL13       22.00 dB
SFO2       300.1312005 MHz

F2 - Processing parameters
SI         32768
SF         75.4677292 MHz
WDW        EM
SSB        0
LB         1.00 Hz
GB         0
PC         1.40
```

Click-Alkynylation of N- and P- Nucleophiles by Oxidative Cross-Coupling with Alkynylcopper Reagents

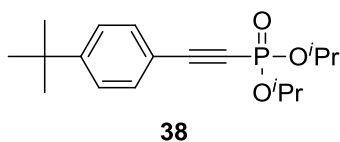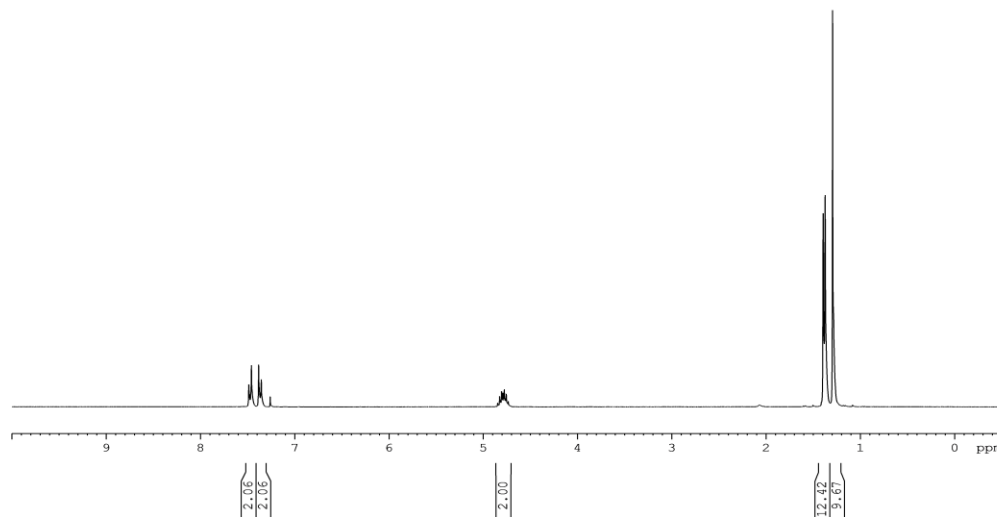

```
Current Data Parameters
NAME      FC23JH062
EXPNO     10
PROCNO    1

F2 - Acquisition Parameters
Date_     20110611
Time      23.39
INSTRUM   spect
PROBHD    5 mm BBI 1H-BB
PULPROG   zg30
TD        32768
SOLVENT   CDCl3
NS         16
DS         0
SWH        6313.131 Hz
FIDRES     0.192661 Hz
AQ         2.5952756 sec
RG         80.6
DW         79.200 usec
DE         6.50 usec
TE         294.1 K
D1         1.00000000 sec
MCREST     0.00000000 sec
MCWRK     0.01500000 sec

===== CHANNEL f1 =====
NUC1       1H
P1         6.20 usec
PL1        0.00 dB
SFO1       300.1328512 MHz

F2 - Processing parameters
SI         32768
SF         300.1300063 MHz
WDW        EM
SSB        0
LB         0.10 Hz
GB         0
PC         1.00

1D NMR plot parameters
CX         20.00 cm
CY         12.50 cm
F1P        1.508 ppm
F1         452.47 Hz
F2P        1.174 ppm
F2         352.32 Hz
PPMCM      0.01668 ppm/cm
HZCM       5.00767 Hz/cm
```

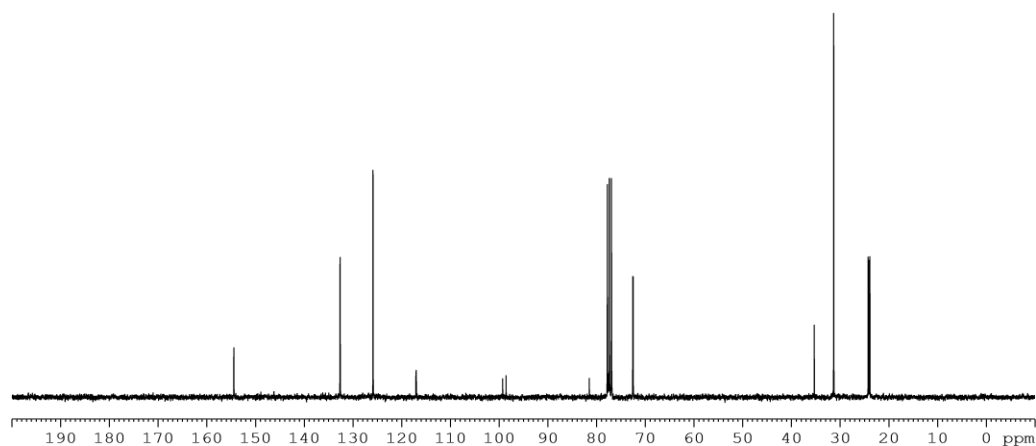

```
Current Data Parameters
NAME      FC23JH062
EXPNO     11
PROCNO    1

F2 - Acquisition Parameters
Date_     20110612
Time      0.46
INSTRUM   spect
PROBHD    5 mm BBI 1H-BB
PULPROG   zgpg30
TD        65536
SOLVENT   CDCl3
NS         1024
DS         4
SWH        17985.611 Hz
FIDRES     0.274439 Hz
AQ         1.8219508 sec
RG         1625.5
DW         27.800 usec
DE         10.00 usec
TE         294.3 K
D1         2.00000000 sec
d11        0.03000000 sec
DELTA      1.89999998 sec
MCREST     0.00000000 sec
MCWRK     0.01500000 sec

===== CHANNEL f1 =====
NUC1       13C
P1         9.00 usec
PL1        -6.00 dB
SFO1       75.4752953 MHz

===== CHANNEL f2 =====
CPDPRG2   waltz16
NUC2       1H
PCPD2     80.00 usec
PL2        0.00 dB
PL12       22.00 dB
PL13       22.00 dB
SFO2       300.1312005 MHz

F2 - Processing parameters
SI         32768
SF         75.4677265 MHz
WDW        EM
SSB        0
LB         1.00 Hz
GB         0
PC         1.40

1D NMR plot parameters
CX         20.00 cm
CY         12.50 cm
F1P        200.000 ppm
F1         15093.55 Hz
F2P        -10.000 ppm
F2         -754.68 Hz
PPMCM      10.50000 ppm/cm
HZCM       792.41113 Hz/cm
```

Click-Alkynylation of N- and P- Nucleophiles by Oxidative Cross-Coupling with Alkynylcopper Reagents

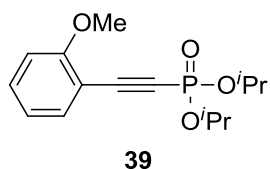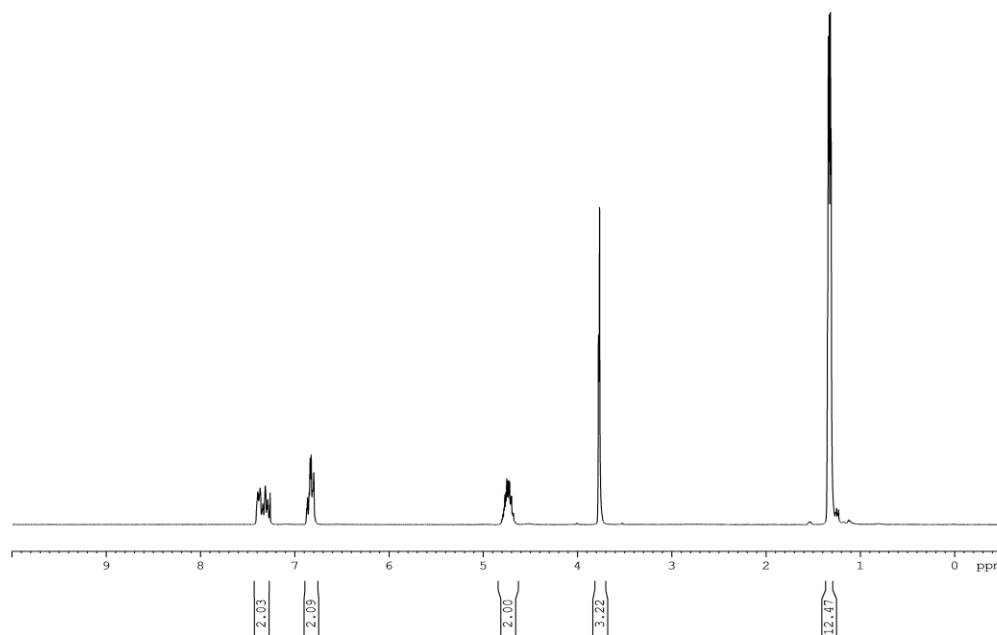

Current Data Parameters  
NAME fc47kj723a  
EXPNO 12  
PROCNO 1

F2 - Acquisition Parameters  
Date\_ 20111125  
Time 6.52  
INSTRUM spect  
PROBHD 5 mm QNP 1H/13  
PULPROG zg30  
TD 16384  
SOLVENT CDCl3  
NS 16  
DS 2  
SWH 4194.631 Hz  
FIDRES 0.256020 Hz  
AQ 1.9530228 sec  
RG 64  
DW 119.200 usec  
DE 6.50 usec  
TE 294.3 K  
D1 1.00000000 sec  
MCREST 0.00000000 sec  
MCWRK 0.01500000 sec

===== CHANNEL f1 =====  
NUC1 1H  
P1 6.50 usec  
PL1 -6.00 dB  
SFO1 300.1319508 MHz

F2 - Processing parameters  
SI 32768  
SF 300.1300050 MHz  
WDW EM  
SSB 0  
LB 0.10 Hz  
GB 0  
PC 1.00

1D NMR plot parameters  
CX 20.00 cm  
CY 21.35 cm  
F1P 7.625 ppm  
F1 2288.63 Hz  
F2P 4.490 ppm  
F2 1347.56 Hz  
PPMCM 0.15678 ppm/cm  
HZCM 47.05340 Hz/cm

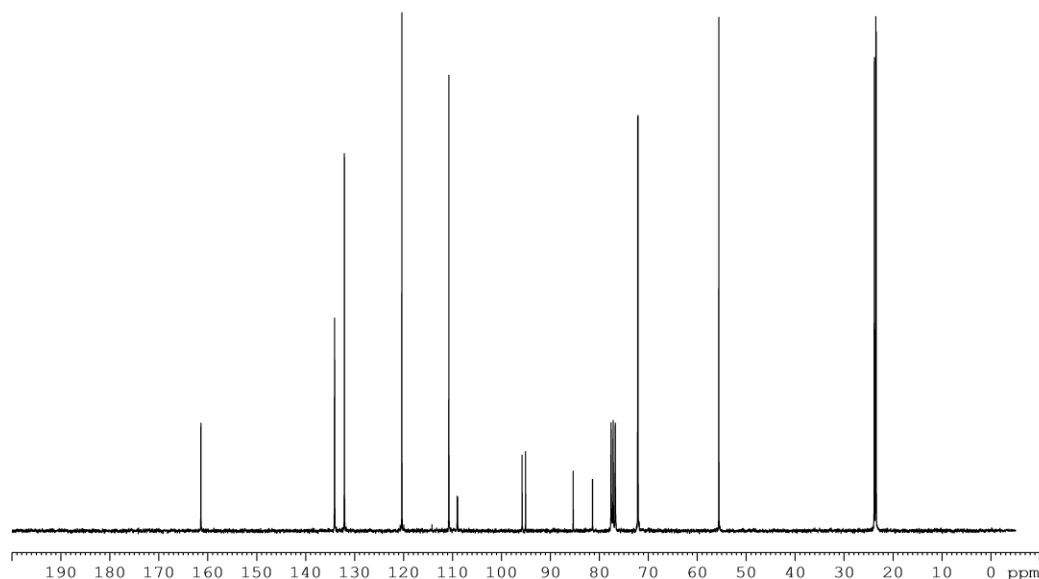

Current Data Parameters  
NAME fc47kj723a  
EXPNO 10  
PROCNO 1

F2 - Acquisition Parameters  
Date\_ 20111125  
Time 6.35  
INSTRUM spect  
PROBHD 5 mm QNP 1H/13  
PULPROG zgpg30  
TD 32768  
SOLVENT CDCl3  
NS 1024  
DS 4  
SWH 18115.941 Hz  
FIDRES 0.552855 Hz  
AQ 0.9044468 sec  
RG 11585.2  
DW 27.600 usec  
DE 10.00 usec  
TE 294.6 K  
D1 2.00000000 sec  
d11 0.03000000 sec  
DELTA 1.89999998 sec  
MCREST 0.00000000 sec  
MCWRK 0.01500000 sec

===== CHANNEL f1 =====  
NUC1 13C  
P1 5.10 usec  
PL1 -6.00 dB  
SFO1 75.4764278 MHz

===== CHANNEL f2 =====  
CPDPRG2 waltz16  
NUC2 1H  
PCPD2 80.00 usec  
PL2 -6.00 dB  
PL12 15.80 dB  
PL13 15.80 dB  
SFO2 300.1312005 MHz

F2 - Processing parameters  
SI 32768  
SF 75.4677514 MHz  
WDW EM  
SSB 0  
LB 1.00 Hz  
GB 0  
PC 1.40

1D NMR plot parameters  
CX 20.00 cm  
CY 7.16 cm  
F1P 122.095 ppm  
F1 9214.24 Hz  
F2P 64.702 ppm  
F2 4882.90 Hz  
PPMCM 2.86966 ppm/cm  
HZCM 216.56683 Hz/cm





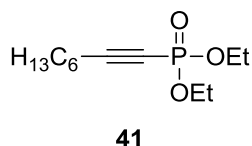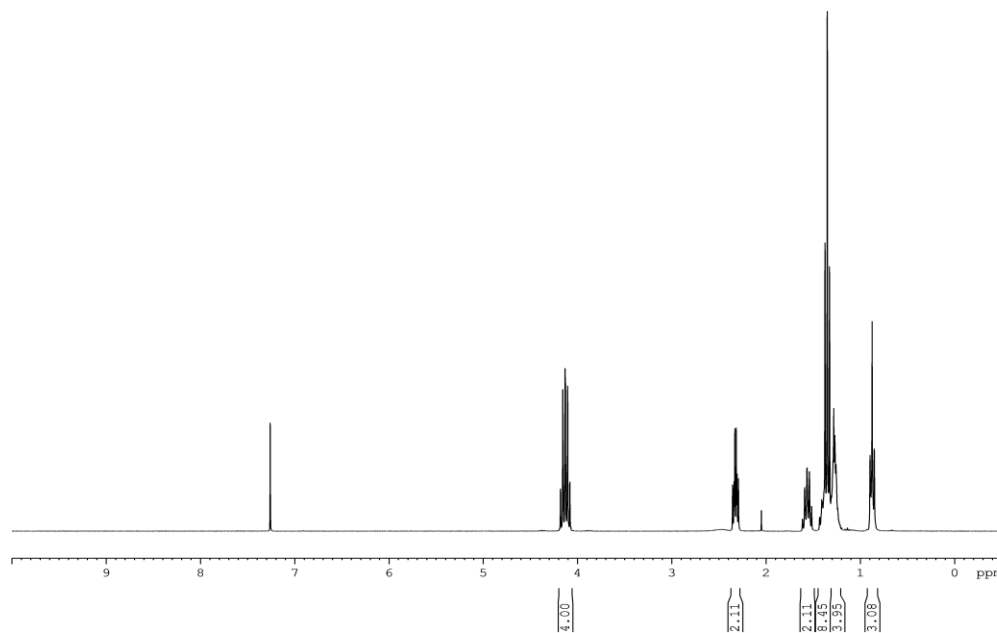

```
Current Data Parameters
NAME      FC19KJ492A
EXPNO     10
PROCNO    1

F2 - Acquisition Parameters
Date_     20110515
Time      22.06
INSTRUM   spect
PROBHD    5 mm BBI 1H-BB
PULPROG   zg30
TD         32768
SOLVENT   CDCl3
NS         16
DS         0
SWH        6313.131 Hz
FIDRES     0.192661 Hz
AQ         2.5952756 sec
RG         228.1
DW         79.200 usec
DE         6.50 usec
TE         293.4 K
D1         1.00000000 sec
MCREST     0.00000000 sec
MCWRK      0.01500000 sec

===== CHANNEL f1 =====
NUC1       1H
P1         6.20 usec
PL1        0.00 dB
SFO1       300.1328512 MHz

F2 - Processing parameters
SI         32768
SF         300.1300061 MHz
WDW        EM
SSB        0
LB         0.10 Hz
GB         0
PC         1.00

1D NMR plot parameters
CX         20.00 cm
CY         12.50 cm
FLP        1.792 ppm
F1         537.86 Hz
F2P        0.624 ppm
F2         187.38 Hz
PEMCM      0.05839 ppm/cm
HZCM       17.52399 Hz/cm
```

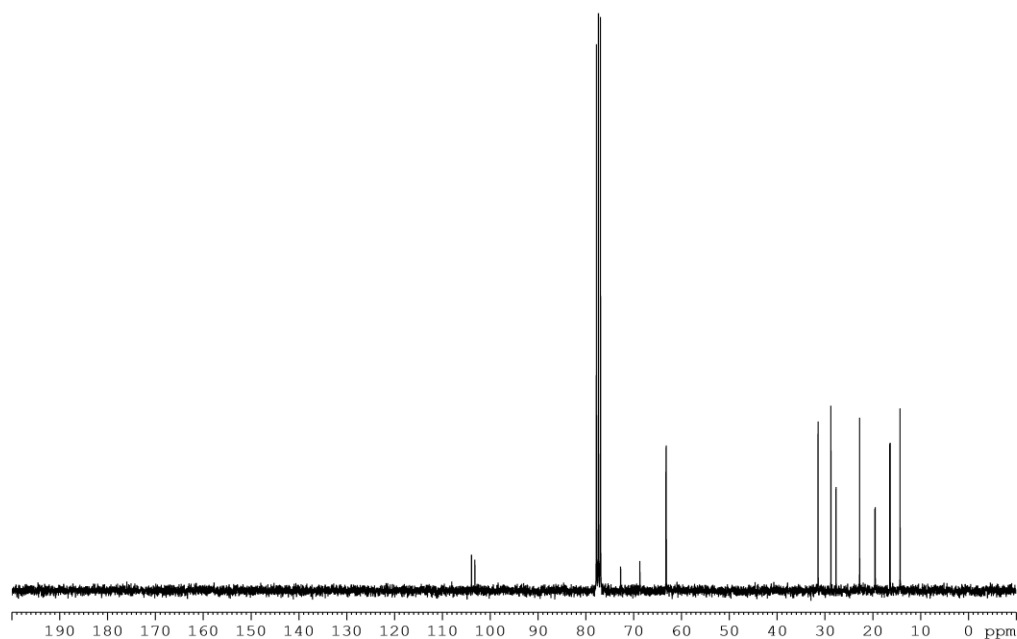

```
Current Data Parameters
NAME      FC19KJ492A
EXPNO     11
PROCNO    1

F2 - Acquisition Parameters
Date_     20110515
Time      23.15
INSTRUM   spect
PROBHD    5 mm BBI 1H-BB
PULPROG   zgpg30
TD         65536
SOLVENT   CDCl3
NS         1024
DS         4
SWH        17985.611 Hz
FIDRES     0.274439 Hz
AQ         1.8219508 sec
RG         1625.5
DW         27.800 usec
DE         10.00 usec
TE         293.6 K
D1         2.00000000 sec
d11        0.03000000 sec
DELTA      1.89999998 sec
MCREST     0.00000000 sec
MCWRK      0.01500000 sec

===== CHANNEL f1 =====
NUC1       13C
P1         9.00 usec
PL1        -6.00 dB
SFO1       75.4752953 MHz

===== CHANNEL f2 =====
CPDPRG2   waltz16
NUC2       1H
PCPD2      80.00 usec
PL2        0.00 dB
PL12       22.00 dB
PL13       22.00 dB
SFO2       300.1312005 MHz

F2 - Processing parameters
SI         32768
SF         75.4677249 MHz
WDW        EM
SSB        0
LB         1.00 Hz
GB         0
PC         1.40
```

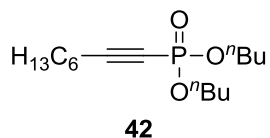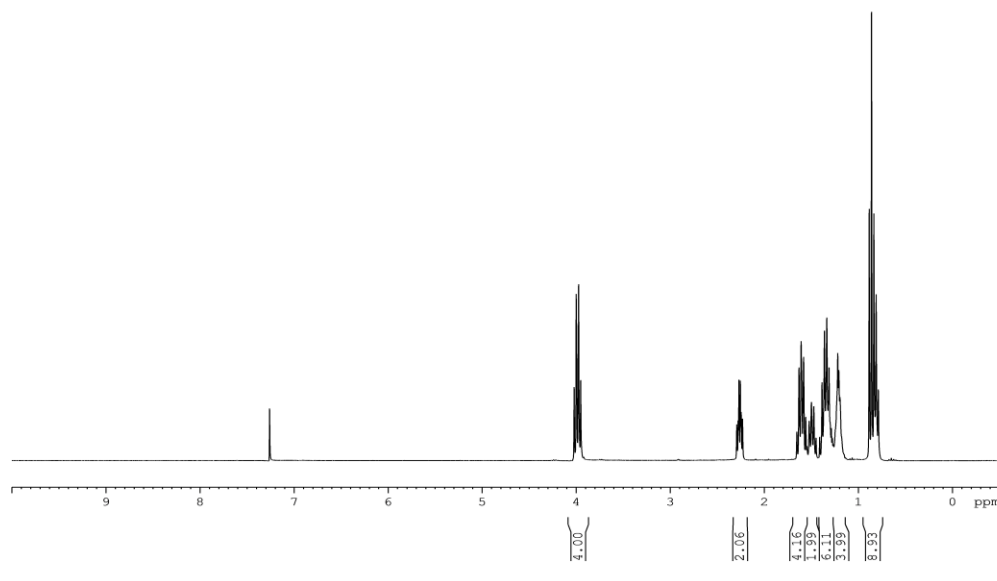

```
Current Data Parameters
NAME      fc30kj492b
EXPNO     301
PROCNO    1

F2 - Acquisition Parameters
Date_     20110725
Time      10.19
INSTRUM   spect
PROBHD    5 mm BBI 1H-BB
PULPROG   zg30
TD         32768
SOLVENT   DMSO
NS         16
DS         0
SWH        6313.131 Hz
FIDRES     0.192661 Hz
AQ         2.5952756 sec
RG         32
DW         79.200 usec
DE         6.50 usec
TE         294.5 K
D1         1.00000000 sec
MCREST     0.00000000 sec
MCWRK     0.01500000 sec

===== CHANNEL f1 =====
NUC1       1H
P1         6.80 usec
PL1        0.00 dB
SFO1       300.1328512 MHz

F2 - Processing parameters
SI         32768
SF         300.1300059 MHz
WDW        EM
SSB        0
LB         0.10 Hz
GB         0
PC         1.00

1D NMR plot parameters
CX         20.00 cm
CY         12.50 cm
F1P        1.117 ppm
F1         335.29 Hz
F2P        0.520 ppm
F2         155.95 Hz
PPMCM      0.02988 ppm/cm
HZCM       8.96741 Hz/cm
```

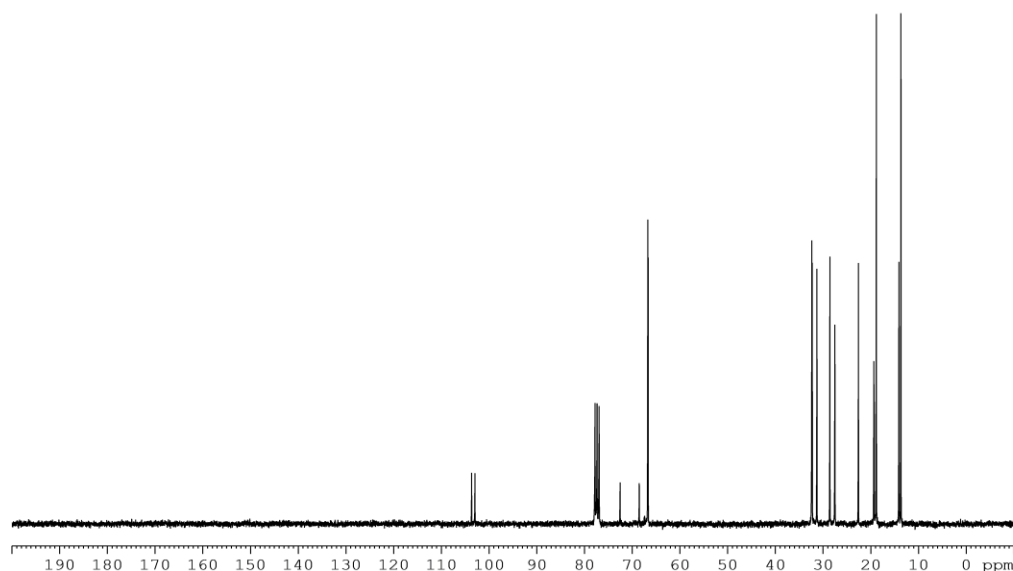

```
Current Data Parameters
NAME      FC19KJ492B
EXPNO     11
PROCNO    1

F2 - Acquisition Parameters
Date_     20110514
Time      10.52
INSTRUM   spect
PROBHD    5 mm BBI 1H-BB
PULPROG   zgpg30
TD         65536
SOLVENT   CDCl3
NS         1024
DS         4
SWH        17985.611 Hz
FIDRES     0.274439 Hz
AQ         1.8219508 sec
RG         1448.2
DW         27.800 usec
DE         10.00 usec
TE         293.5 K
D1         2.00000000 sec
d11        0.03000000 sec
DELTA      1.89999998 sec
MCREST     0.00000000 sec
MCWRK     0.01500000 sec

===== CHANNEL f1 =====
NUC1       13C
P1         9.00 usec
PL1        -6.00 dB
SFO1       75.4752953 MHz

===== CHANNEL f2 =====
CPDPRG2   waltz16
NUC2       1H
PCPD2     80.00 usec
PL2        0.00 dB
PL12       22.00 dB
PL13       22.00 dB
SFO2       300.1312005 MHz

F2 - Processing parameters
SI         32768
SF         75.4677320 MHz
WDW        EM
SSB        0
LB         1.00 Hz
GB         0
PC         1.40
```

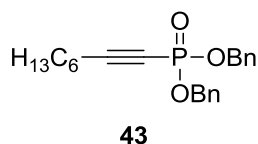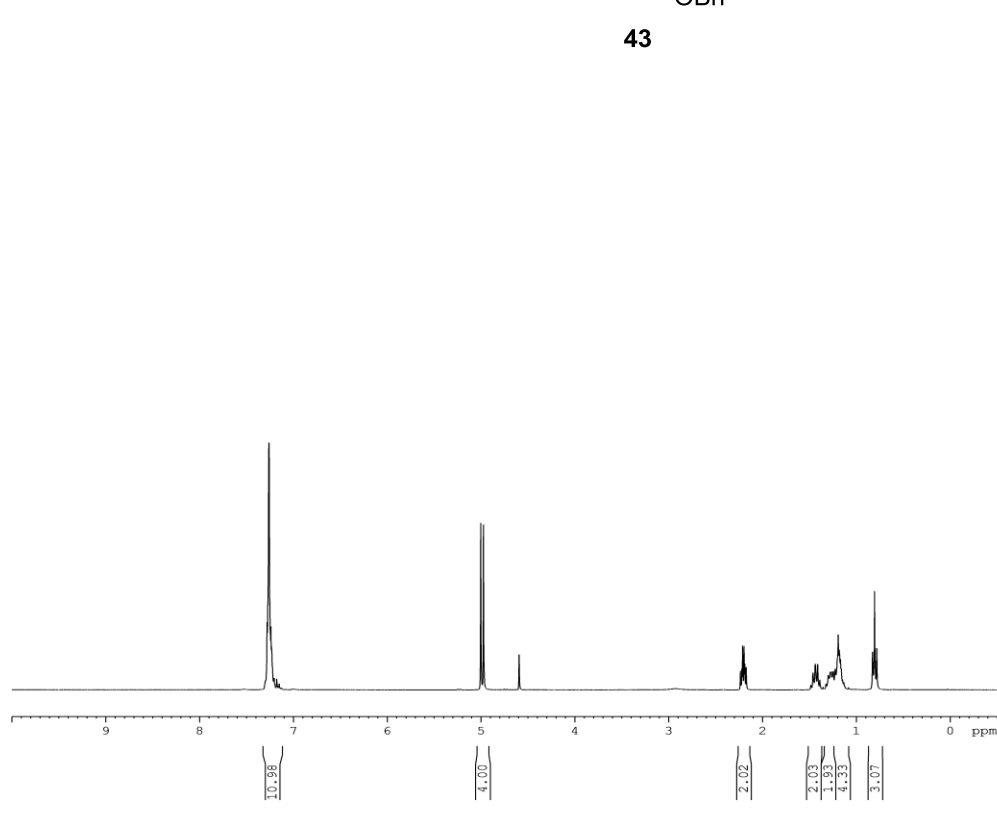

Current Data Parameters  
NAME FC25JH097B  
EXPNO 10  
PROCNO 1

F2 - Acquisition Parameters  
Date\_ 20110624  
Time\_ 16.45  
INSTRUM spect  
PROBHD 5 mm BBI 1H-BB  
PULPROG zg30  
TD 32768  
SOLVENT CDCl3  
NS 16  
DS 0  
SWH 6313.131 Hz  
FIDRES 0.192661 Hz  
AQ 2.5952756 sec  
RG 35.9  
DW 79.200 usec  
DE 6.50 usec  
TE 294.3 K  
D1 1.00000000 sec  
MCREST 0.00000000 sec  
MCWRK 0.01500000 sec

===== CHANNEL f1 =====  
NUC1 1H  
P1 6.20 usec  
PL1 0.00 dB  
SFO1 300.1328512 MHz

F2 - Processing parameters  
SI 32768  
SF 300.1300302 MHz  
WDW EM  
SSB 0  
LB 0.10 Hz  
GB 0  
PC 1.00

1D NMR plot parameters  
CX 20.00 cm  
CY 12.50 cm  
FLP 1.556 ppm  
F1 467.13 Hz  
F2P 0.685 ppm  
F2 205.69 Hz  
PPMCM 0.04355 ppm/cm  
HZCM 13.07202 Hz/cm

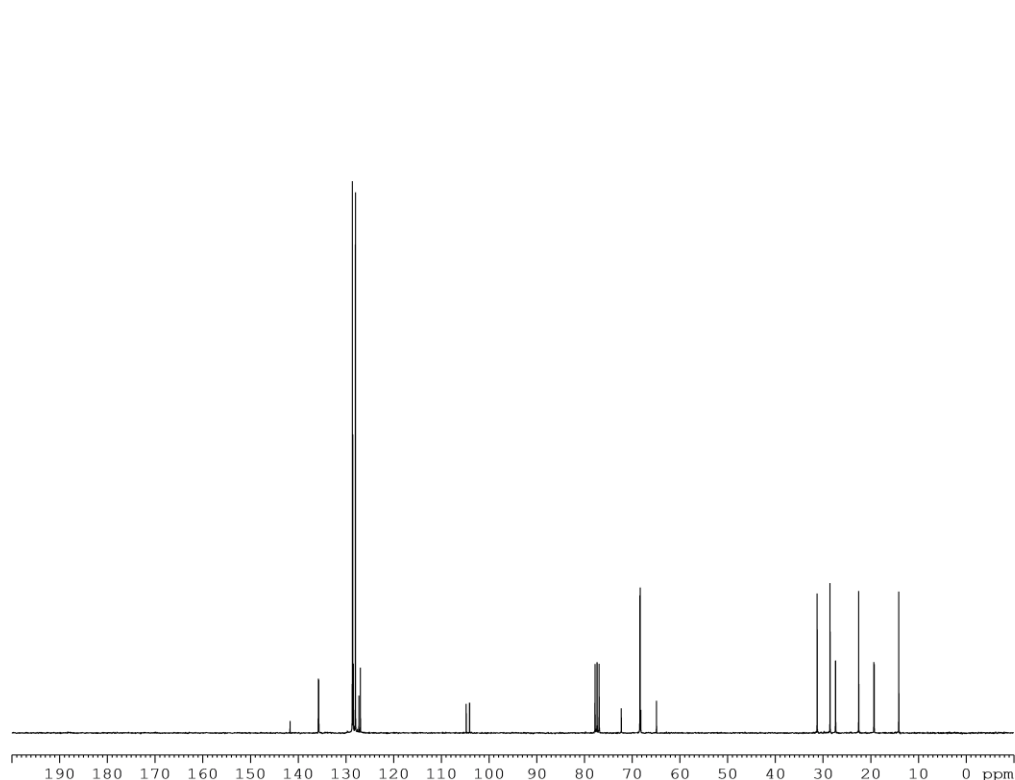

Current Data Parameters  
NAME FC25JH097B  
EXPNO 11  
PROCNO 1

F2 - Acquisition Parameters  
Date\_ 20110624  
Time\_ 17.53  
INSTRUM spect  
PROBHD 5 mm BBI 1H-BB  
PULPROG zgpg30  
TD 65536  
SOLVENT CDCl3  
NS 1024  
DS 4  
SWH 17985.611 Hz  
FIDRES 0.274439 Hz  
AQ 1.8219508 sec  
RG 1625.5  
DW 27.800 usec  
DE 10.00 usec  
TE 294.6 K  
D1 2.00000000 sec  
d11 0.03000000 sec  
DELTA 1.89999998 sec  
MCREST 0.00000000 sec  
MCWRK 0.01500000 sec

===== CHANNEL f1 =====  
NUC1 13C  
P1 9.00 usec  
PL1 -6.00 dB  
SFO1 75.4752953 MHz

===== CHANNEL f2 =====  
CPDPRG2 waltz16  
NUC2 1H  
PCPD2 80.00 usec  
PL2 0.00 dB  
PL12 22.00 dB  
PL13 22.00 dB  
SFO2 300.1312005 MHz

F2 - Processing parameters  
SI 32768  
SF 75.4677424 MHz  
WDW EM  
SSB 0  
LB 1.00 Hz  
GB 0  
PC 1.40

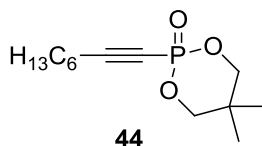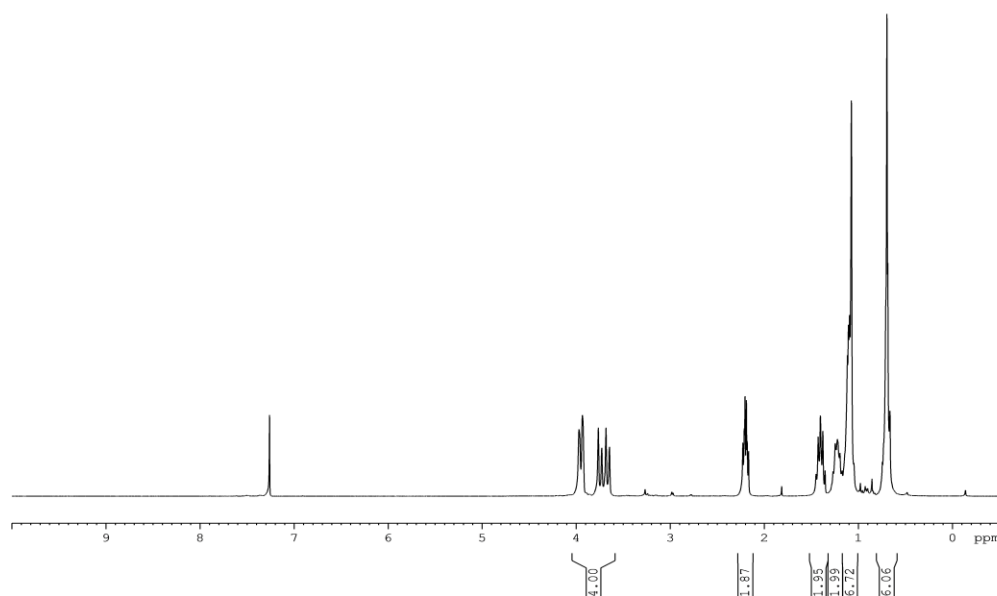

```

Current Data Parameters
NAME      fc24kj539
EXPNO     12
PROCNO    1

F2 - Acquisition Parameters
Date_     20110617
Time      2.48
INSTRUM   spect
PROBHD    5 mm BBI 1H-BB
PULPROG   zg30
TD         32768
SOLVENT   CDCl3
NS         16
DS         0
SWH        6313.131 Hz
FIDRES     0.192661 Hz
AQ         2.5952756 sec
RG         22.6
DW         79.200 usec
DE         6.50 usec
TE         294.9 K
D1         1.00000000 sec
MCREST    0.00000000 sec
MCWRK     0.01500000 sec

===== CHANNEL f1 =====
NUC1       1H
P1         6.20 usec
PL1        0.00 dB
SFO1       300.1328512 MHz

F2 - Processing parameters
SI         32768
SF         300.1300043 MHz
WDW        EM
SSB        0
LB         0.10 Hz
GB         0
PC         1.00

1D NMR plot parameters
CX         20.00 cm
CY         12.50 cm
F1P        1.508 ppm
F1         452.65 Hz
F2P        0.571 ppm
F2         171.48 Hz
PPMCM      0.04684 ppm/cm
HZCM       14.05832 Hz/cm
    
```

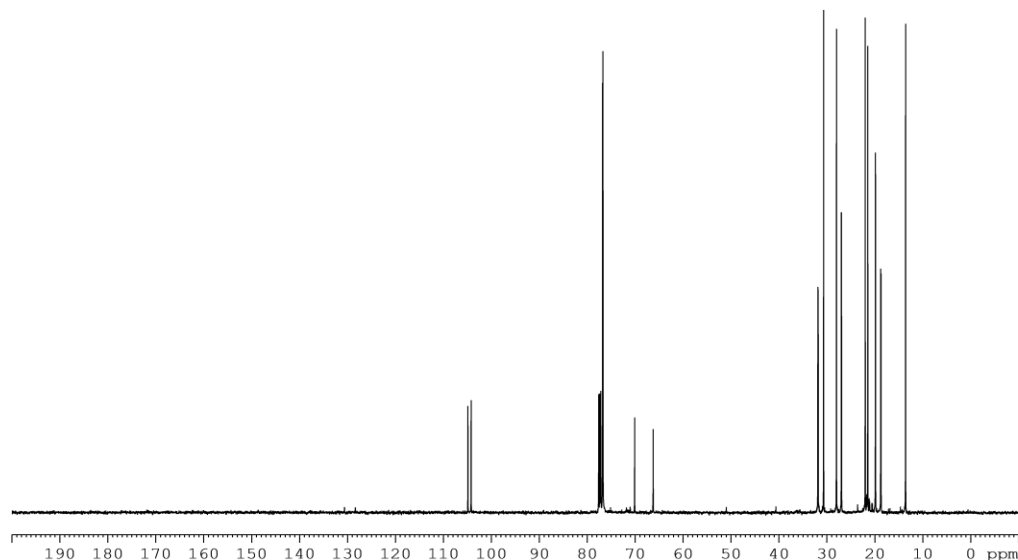

```

Current Data Parameters
NAME      fc24kj539
EXPNO     10
PROCNO    1

F2 - Acquisition Parameters
Date_     20110617
Time      2.30
INSTRUM   spect
PROBHD    5 mm BBI 1H-BB
PULPROG   zgpg30
TD         65536
SOLVENT   CDCl3
NS         1024
DS         4
SWH        17985.611 Hz
FIDRES     0.274439 Hz
AQ         1.8219508 sec
RG         1824.6
DW         27.800 usec
DE         10.00 usec
TE         295.0 K
D1         2.00000000 sec
d11        0.03000000 sec
DELTA      1.89999998 sec
MCREST    0.00000000 sec
MCWRK     0.01500000 sec

===== CHANNEL f1 =====
NUC1       13C
P1         9.00 usec
PL1        -6.00 dB
SFO1       75.4752953 MHz

===== CHANNEL f2 =====
CPDPRG2   waltz16
NUC2       1H
PCPD2      80.00 usec
PL2        0.00 dB
PL12       22.00 dB
PL13       22.00 dB
SFO2       300.1312005 MHz

F2 - Processing parameters
SI         32768
SF         75.4677677 MHz
WDW        EM
SSB        0
LB         1.00 Hz
GB         0
PC         1.40
    
```

Click-Alkynylation of N- and P- Nucleophiles by Oxidative Cross-Coupling with Alkynylcopper Reagents

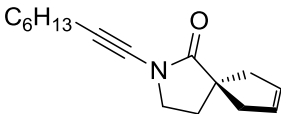

45

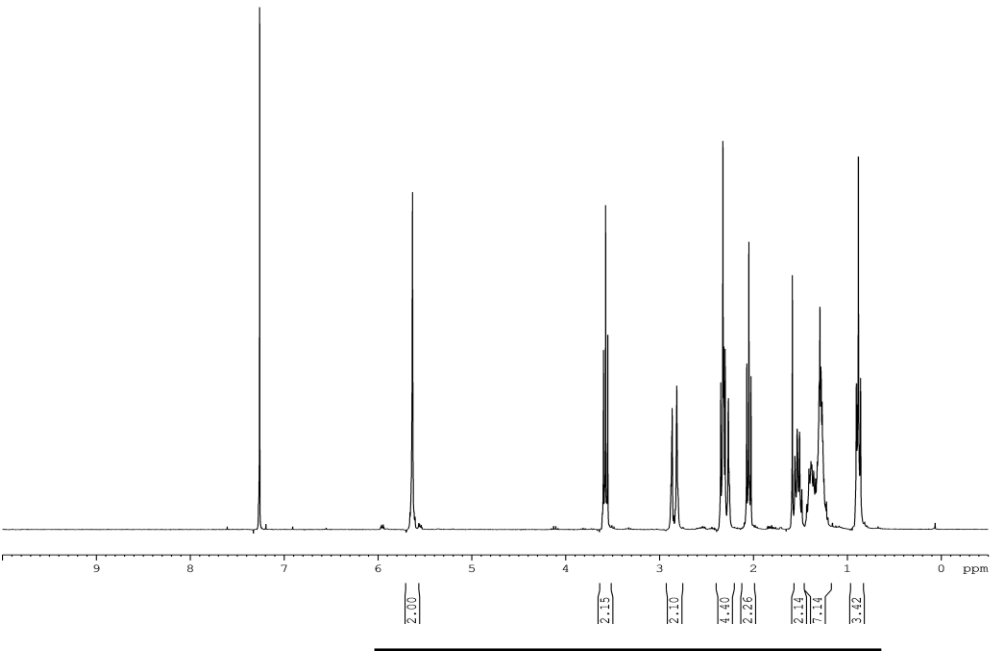

Current Data Parameters  
NAME fc37kj625  
EXPNO 301  
PROCNO 1

F2 - Acquisition Parameters  
Date\_ 20110912  
Time\_ 18.00  
INSTRUM spect  
PROBHD 5 mm BBI 1H-BB  
PULPROG zg30  
TD 32768  
SOLVENT DMSO  
NS 16  
DS 0  
SWH 6313.131 Hz  
FIDRES 0.192661 Hz  
AQ 2.5952796 sec  
RG 456.1  
DW 79.200 usec  
DE 6.50 usec  
TE 295.1 K  
D1 1.00000000 sec  
MCREST 0.00000000 sec  
MCWRK 0.01500000 sec

===== CHANNEL f1 =====  
NUC1 1H  
P1 6.80 usec  
PL1 0.00 dB  
SFO1 300.1328512 MHz

F2 - Processing parameters  
SI 32768  
SF 300.1300059 MHz  
WDW EM  
SSB 0  
LB 0.10 Hz  
GB 0  
PC 1.00

1D NMR plot parameters  
CX 20.00 cm  
CY 9.66 cm  
F1P 3.056 ppm  
F1 917.27 Hz  
F2P 0.199 ppm  
F2 59.78 Hz  
PPMCM 0.14295 ppm/cm  
HZCM 42.87449 Hz/cm

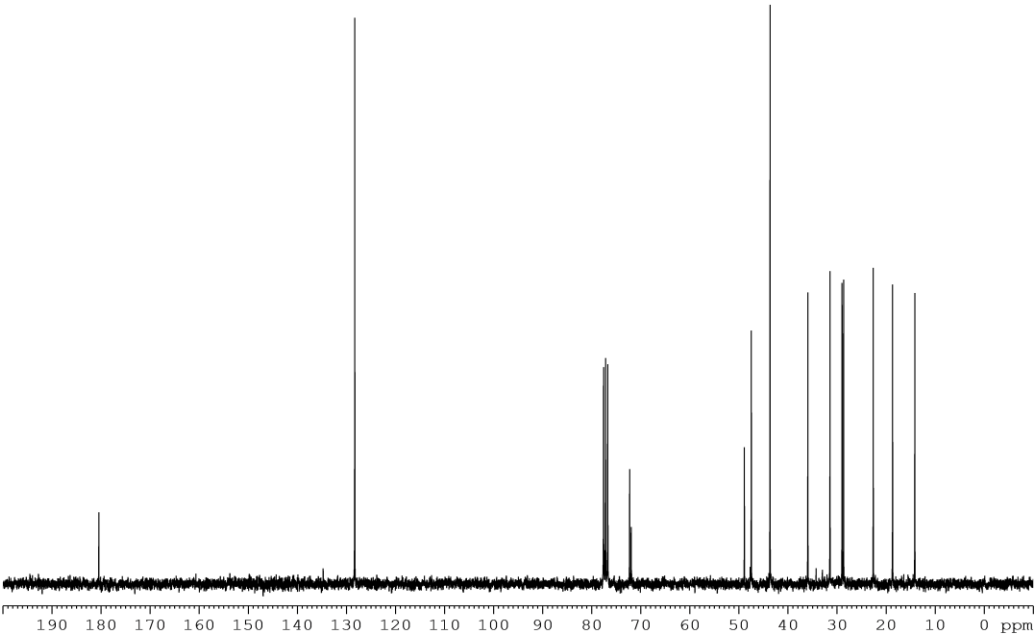

Current Data Parameters  
NAME fc37kj625  
EXPNO 10  
PROCNO 1

F2 - Acquisition Parameters  
Date\_ 20110913  
Time\_ 8.28  
INSTRUM spect  
PROBHD 5 mm BBI 1H-BB  
PULPROG zgpg30  
TD 65536  
SOLVENT CDCl3  
NS 699  
DS 4  
SWH 17985.611 Hz  
FIDRES 0.274439 Hz  
AQ 1.8219508 sec  
RG 1625.5  
DW 27.800 usec  
DE 10.00 usec  
TE 294.9 K  
D1 2.00000000 sec  
d11 0.03000000 sec  
DELTA 1.89999998 sec  
MCREST 0.00000000 sec  
MCWRK 0.01500000 sec

===== CHANNEL f1 =====  
NUC1 13C  
P1 9.00 usec  
PL1 -6.00 dB  
SFO1 75.4752953 MHz

===== CHANNEL f2 =====  
CPDPRG2 waltz16  
NUC2 1H  
PCPD2 80.00 usec  
PL2 0.00 dB  
PL12 22.00 dB  
PL13 22.00 dB  
SFO2 300.1312005 MHz

F2 - Processing parameters  
SI 32768  
SF 75.4677416 MHz  
WDW EM  
SSB 0  
LB 1.00 Hz  
GB 0  
PC 1.40

1D NMR plot parameters  
CX 20.00 cm  
CY 10.02 cm  
F1P 200.000 ppm  
F1 15093.55 Hz  
F2P -10.000 ppm  
F2 -754.68 Hz  
PPMCM 10.50000 ppm/cm  
HZCM 792.41132 Hz/cm

Click-Alkynylation of N- and P- Nucleophiles by Oxidative Cross-Coupling with Alkynylcopper Reagents

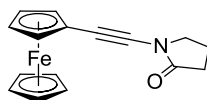

46

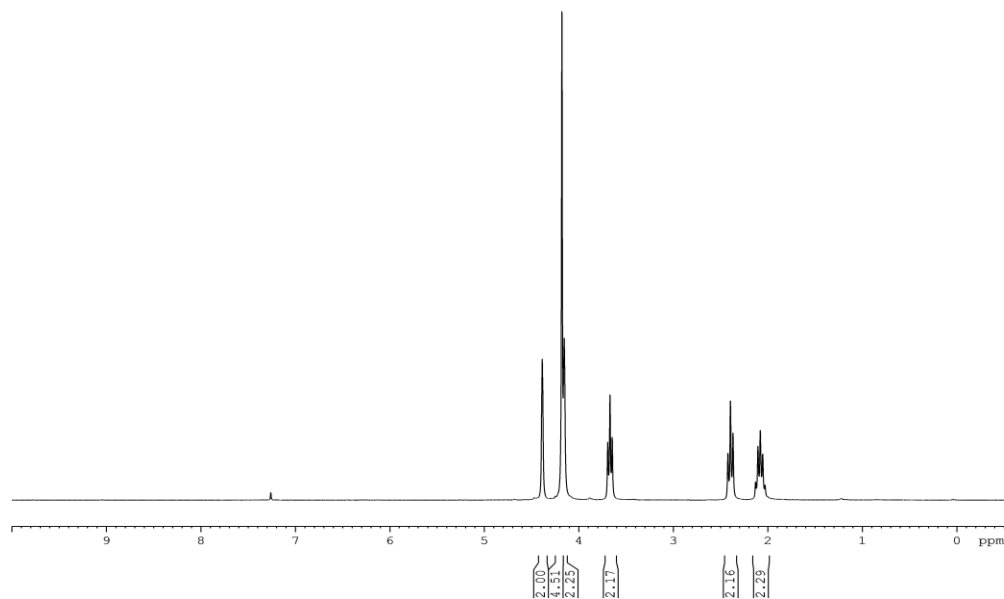

```
Current Data Parameters
NAME      fc35g104EN
EXPNO     12
PROCNO    1

F2 - Acquisition Parameters
Date_     20110902
Time      17.02
INSTRUM   spect
PROBHD    5 mm BBI 1H-BB
PULPROG   zg30
TD         32768
SOLVENT   CDCl3
NS         16
DS         0
SWH        6313.131 Hz
FIDRES     0.192661 Hz
AQ         2.5952756 sec
RG         57
DW         79.200 usec
DE         6.50 usec
TE         295.8 K
D1         1.00000000 sec
MCREST     0.00000000 sec
MCWRK     0.01500000 sec

===== CHANNEL f1 =====
NUC1       1H
P1         6.20 usec
PL1        0.00 dB
SFO1       300.1328512 MHz

F2 - Processing parameters
SI         32768
SF         300.1300057 MHz
WDW        EM
SSB        0
LB         0.10 Hz
GB         0
PC         1.00

1D NMR plot parameters
CX         20.00 cm
CY         9.65 cm
F1P        10.000 ppm
F1         3001.30 Hz
F2P        -0.500 ppm
F2         -150.06 Hz
PPMCM      0.52500 ppm/cm
HZCM       157.56825 Hz/cm
```

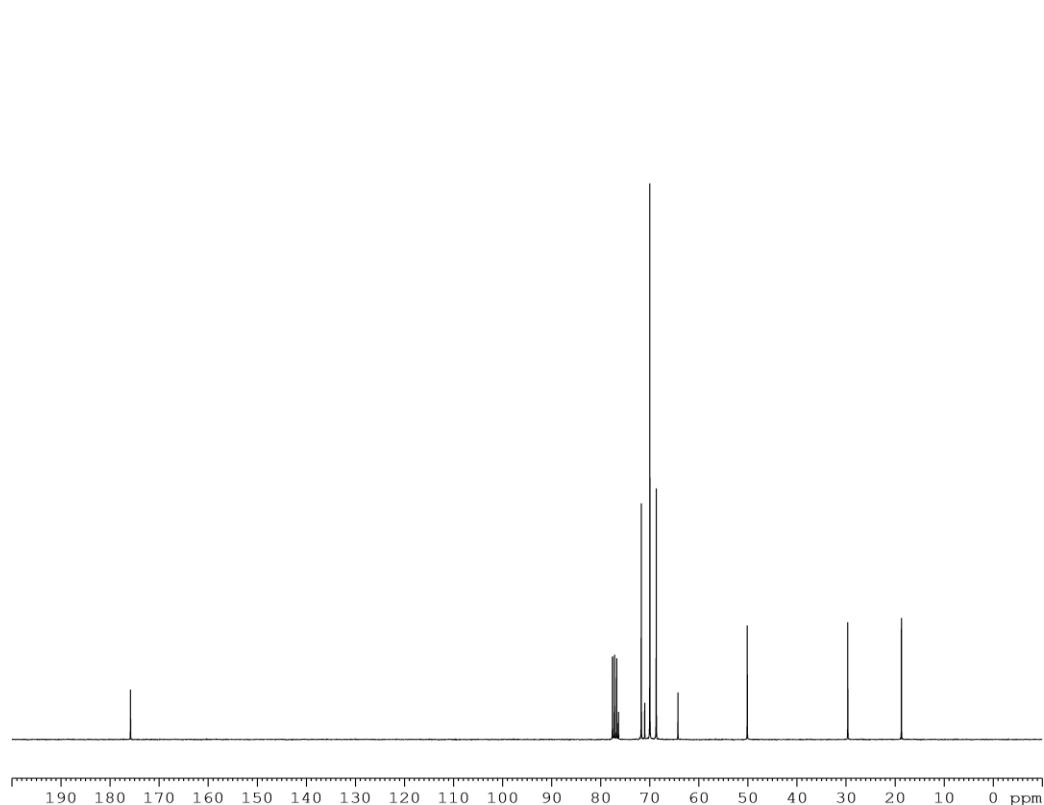

```
Current Data Parameters
NAME      fc35g104EN
EXPNO     10
PROCNO    1

F2 - Acquisition Parameters
Date_     20110902
Time      16.43
INSTRUM   spect
PROBHD    5 mm BBI 1H-BB
PULPROG   zgpg30
TD         65536
SOLVENT   CDCl3
NS         2000
DS         4
SWH        17985.611 Hz
FIDRES     0.274439 Hz
AQ         1.8219508 sec
RG         1625.5
DW         27.800 usec
DE         10.00 usec
TE         295.9 K
D1         2.00000000 sec
d11        0.03000000 sec
DELTA      1.89999998 sec
MCREST     0.00000000 sec
MCWRK     0.01500000 sec

===== CHANNEL f1 =====
NUC1       13C
P1         9.00 usec
PL1        -6.00 dB
SFO1       75.4752953 MHz

===== CHANNEL f2 =====
CPDPRG2   waltz16
NUC2       1H
PCPD2     80.00 usec
PL2        0.00 dB
PL12       22.00 dB
PL13       22.00 dB
SFO2       300.1312005 MHz

F2 - Processing parameters
SI         32768
SF         75.4677526 MHz
WDW        EM
SSB        0
LB         1.00 Hz
GB         0
PC         1.40

1D NMR plot parameters
CX         20.00 cm
CY         9.78 cm
F1P        200.000 ppm
F1         15093.55 Hz
F2P        -10.000 ppm
F2         -754.68 Hz
PPMCM      10.50000 ppm/cm
HZCM       792.41138 Hz/cm
```

Click-Alkynylation of N- and P- Nucleophiles by Oxidative Cross-Coupling with Alkynylcopper Reagents

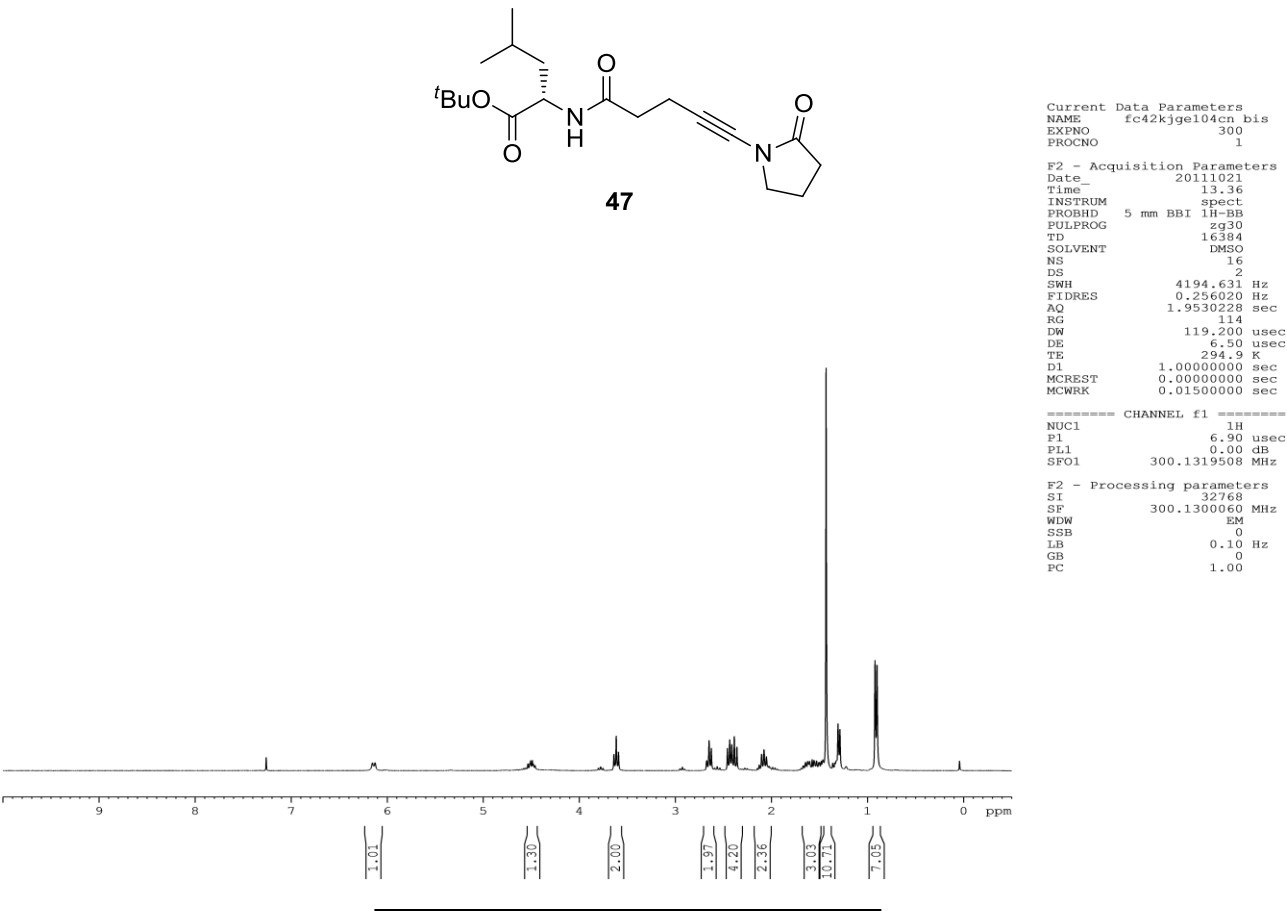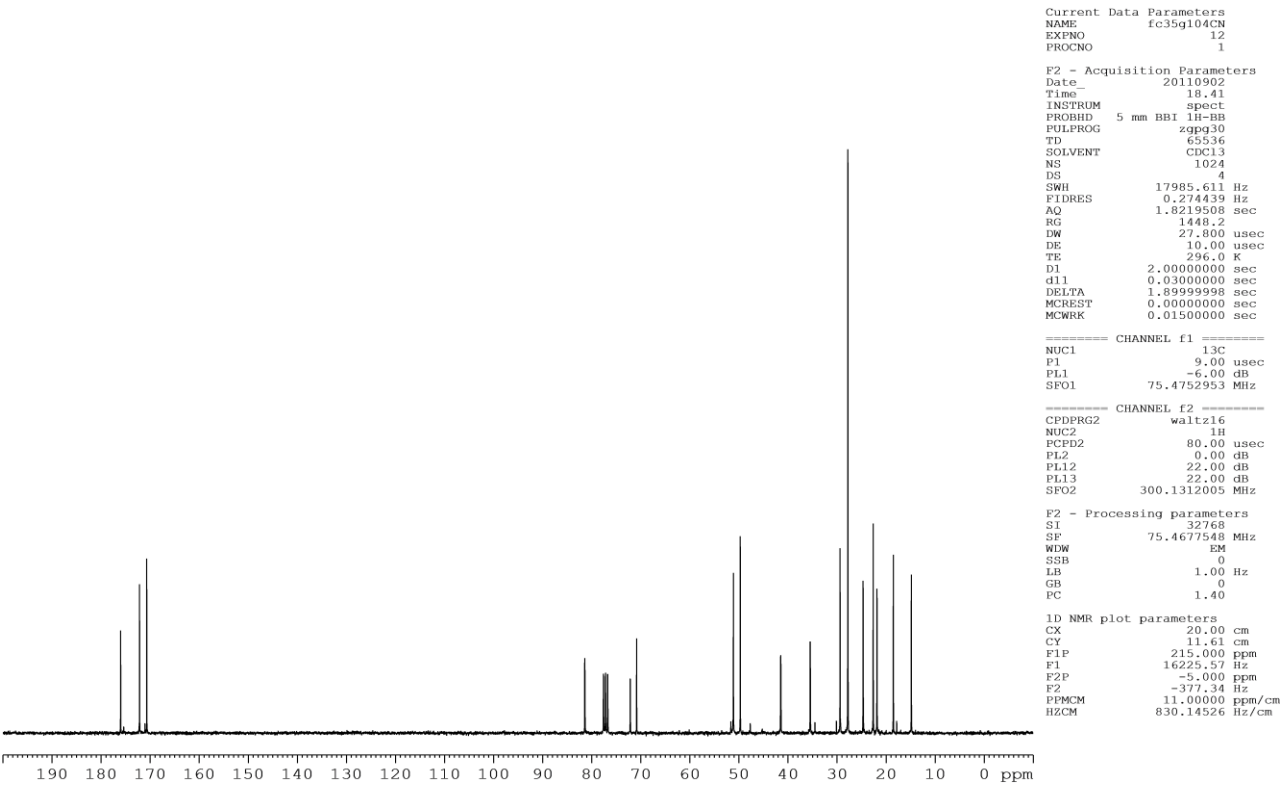



Click-Alkynylation of N- and P- Nucleophiles by Oxidative Cross-Coupling with Alkynylcopper Reagents

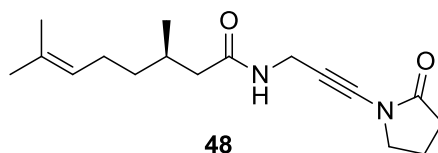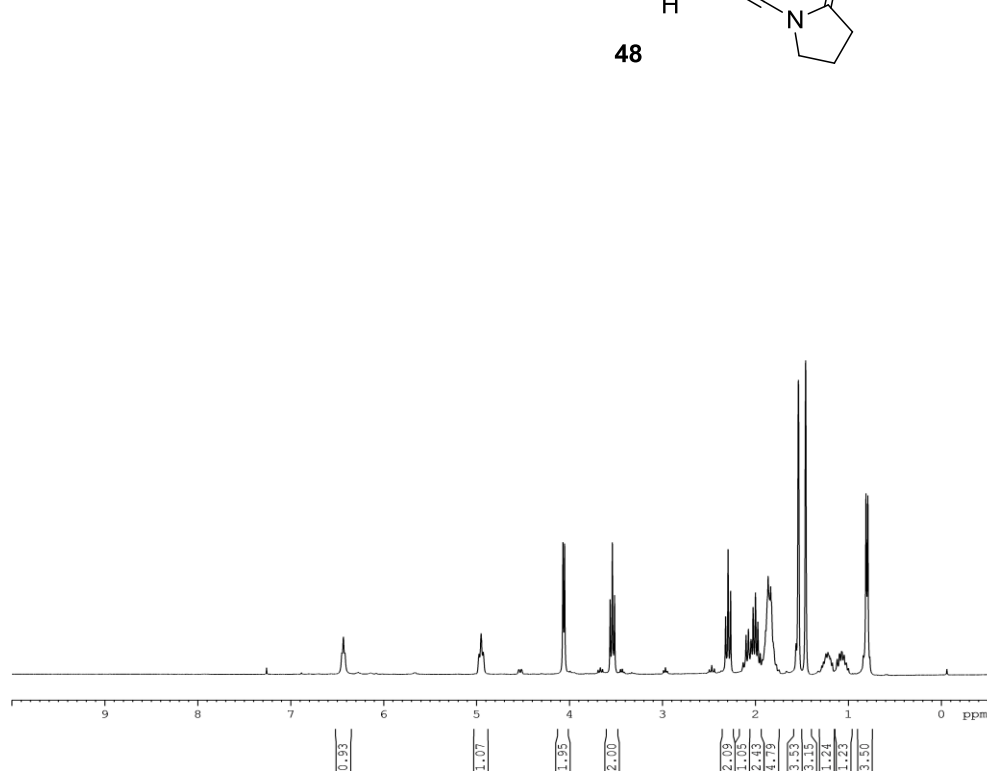

Current Data Parameters  
NAME fc35g104CA  
EXPNO 12  
PROCNO 1

F2 - Acquisition Parameters  
Date\_ 20110901  
Time 18.32  
INSTRUM spect  
PROBHD 5 mm BBI 1H-BB  
PULPROG zg30  
TD 32768  
SOLVENT CDCl3  
NS 16  
DS 0  
SWH 6313.131 Hz  
FIDRES 0.192661 Hz  
AQ 2.5952756 sec  
RG 28.5  
DW 79.200 usec  
DE 6.50 usec  
TE 295.2 K  
D1 1.0000000 sec  
MCREST 0.0000000 sec  
MCWRK 0.0150000 sec

===== CHANNEL f1 =====  
NUC1 1H  
P1 6.20 usec  
PL1 0.00 dB  
SFO1 300.1328512 MHz

F2 - Processing parameters  
SI 32768  
SF 300.1300055 MHz  
WDW EM  
SSB 0  
LB 0.10 Hz  
GB 0  
PC 1.00

1D NMR plot parameters  
CX 20.00 cm  
CY 22.73 cm  
F1P 10.000 ppm  
F1 3001.30 Hz  
F2P -0.500 ppm  
F2 -150.06 Hz  
PFMCM 0.52500 ppm/cm  
HZCM 157.56825 Hz/cm

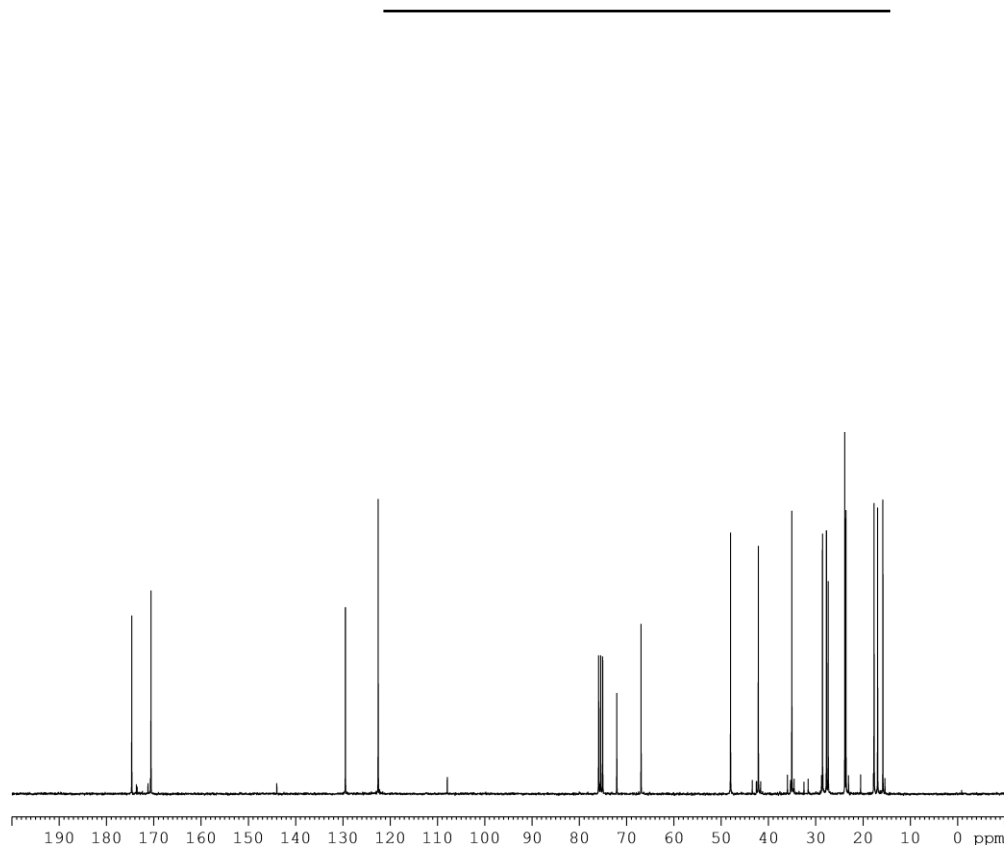

Current Data Parameters  
NAME fc35g104CA  
EXPNO 10  
PROCNO 1

F2 - Acquisition Parameters  
Date\_ 20110901  
Time 18.13  
INSTRUM spect  
PROBHD 5 mm BBI 1H-BB  
PULPROG zgpg30  
TD 65536  
SOLVENT CDCl3  
NS 2000  
DS 4  
SWH 17985.611 Hz  
FIDRES 0.274439 Hz  
AQ 1.8219508 sec  
RG 1824.6  
DW 27.800 usec  
DE 10.00 usec  
TE 295.4 K  
D1 2.0000000 sec  
d11 0.0300000 sec  
DELTA 1.8999999 sec  
MCREST 0.0000000 sec  
MCWRK 0.0150000 sec

===== CHANNEL f1 =====  
NUC1 13C  
P1 9.00 usec  
PL1 -6.00 dB  
SFO1 75.4752953 MHz

===== CHANNEL f2 =====  
CPDPRG2 waltz16  
NUC2 1H  
PCPD2 80.00 usec  
PL2 0.00 dB  
PL12 22.00 dB  
PL13 22.00 dB  
SFO2 300.1312005 MHz

F2 - Processing parameters  
SI 32768  
SF 75.4678816 MHz  
WDW EM  
SSB 0  
LB 1.00 Hz  
GB 0  
PC 1.40

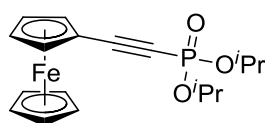

49

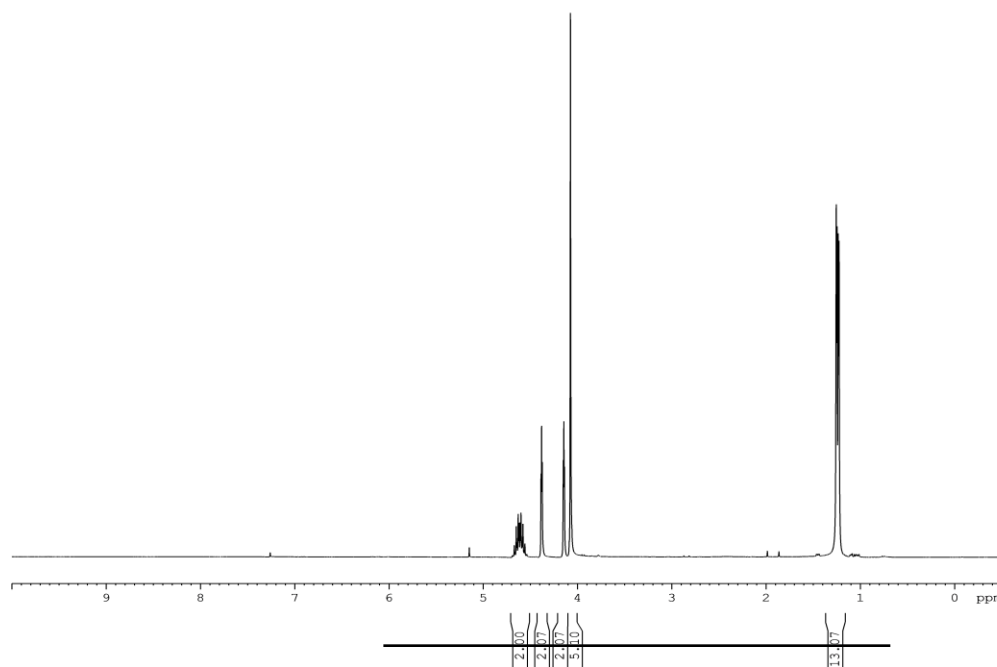

```
Current Data Parameters
NAME      fc35gl06EP
EXPNO     12
PROCNO    1

F2 - Acquisition Parameters
Date_     20110903
Time      23.11
INSTRUM   spect
PROBHD    5 mm BBI 1H-BB
PULPROG   zg30
TD         32768
SOLVENT   CDCl3
NS         16
DS         0
SWH        6313.131 Hz
FIDRES     0.192661 Hz
AQ         2.5952756 sec
RG         25.4
DW         79.200 usec
DE         6.50 usec
TE         296.3 K
D1         1.00000000 sec
MCREST     0.00000000 sec
MCWRK     0.01500000 sec

===== CHANNEL f1 =====
NUC1       1H
P1         6.20 usec
PL1        0.00 dB
SFO1       300.1328512 MHz

F2 - Processing parameters
SI         32768
SF         300.1300053 MHz
WDW        EM
SSB        0
LB         0.10 Hz
GB         0
PC         1.00

1D NMR plot parameters
CX         20.00 cm
CY         11.43 cm
F1P        1.445 ppm
F1         433.60 Hz
F2P        1.074 ppm
F2         322.34 Hz
FPMCM      0.01854 ppm/cm
HZCM       5.56340 Hz/cm
```

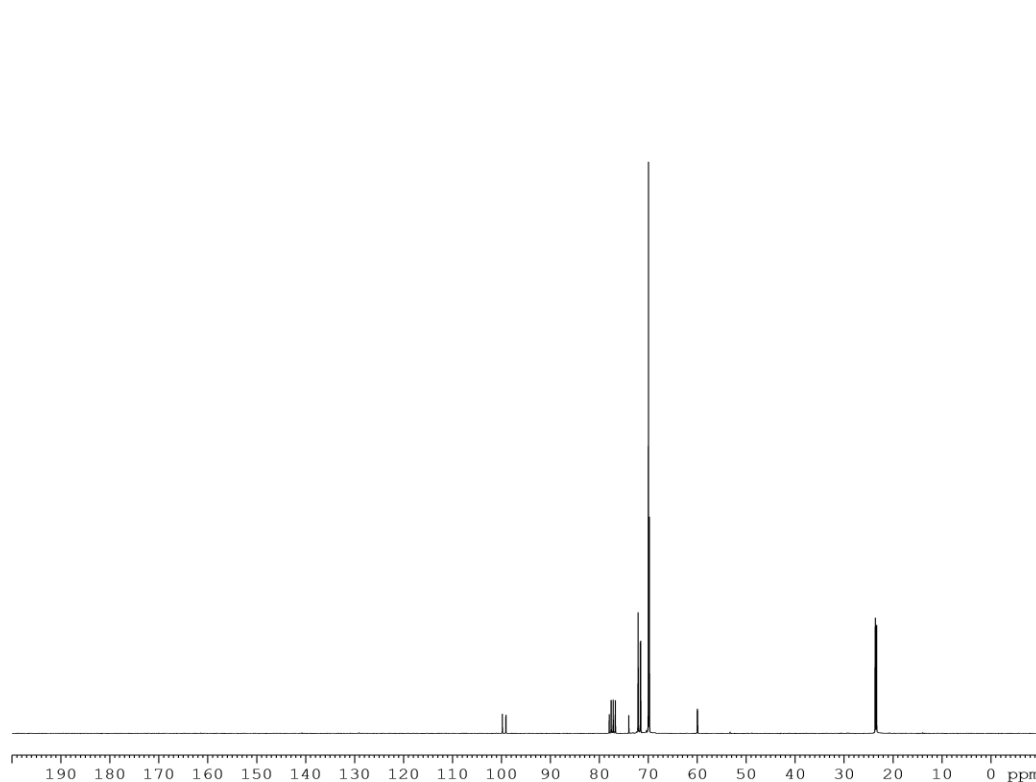

```
Current Data Parameters
NAME      fc35gl06EP
EXPNO     10
PROCNO    1

F2 - Acquisition Parameters
Date_     20110903
Time      22.52
INSTRUM   spect
PROBHD    5 mm BBI 1H-BB
PULPROG   zgpg30
TD         65536
SOLVENT   CDCl3
NS         3000
DS         4
SWH        17985.611 Hz
FIDRES     0.274439 Hz
AQ         1.8219508 sec
RG         1290.2
DW         27.800 usec
DE         10.00 usec
TE         296.5 K
D1         2.00000000 sec
d11        0.03000000 sec
DELTA      1.89999998 sec
MCREST     0.00000000 sec
MCWRK     0.01500000 sec

===== CHANNEL f1 =====
NUC1       13C
P1         9.00 usec
PL1        -6.00 dB
SFO1       75.4752953 MHz

===== CHANNEL f2 =====
CPDPRG2   waltz16
NUC2       1H
PCPD2      80.00 usec
PL2        0.00 dB
PL12       22.00 dB
PL13       22.00 dB
SFO2       300.1312005 MHz

F2 - Processing parameters
SI         32768
SF         75.4677646 MHz
WDW        EM
SSB        0
LB         1.00 Hz
GB         0
PC         1.40

1D NMR plot parameters
CX         20.00 cm
CY         44.06 cm
F1P        28.937 ppm
F1         2183.83 Hz
F2P        17.637 ppm
F2         1331.02 Hz
FPMCM      0.56502 ppm/cm
HZCM       42.64077 Hz/cm
```

Click-Alkynylation of N- and P- Nucleophiles by Oxidative Cross-Coupling with Alkynylcopper Reagents

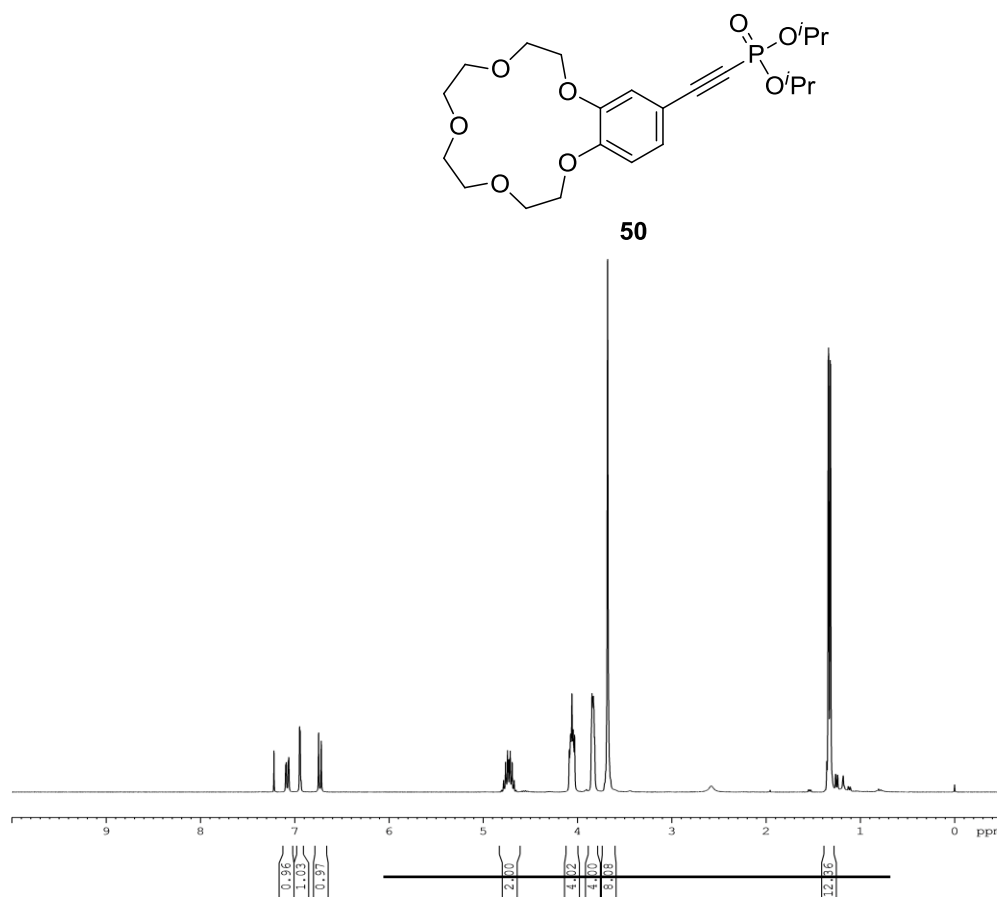

Current Data Parameters  
NAME fc37kj634b  
EXPNO 12  
PROCNO 1

F2 - Acquisition Parameters  
Date\_ 20110916  
Time\_ 7.02  
INSTRUM spect  
PROBHD 5 mm BBI 1H-BB  
PULPROG zg30  
TD 32768  
SOLVENT CDCl3  
NS 16  
DS 0  
SWH 6313.131 Hz  
FIDRES 0.192661 Hz  
AQ 2.5952756 sec  
RG 80.6  
DW 79.200 usec  
DE 6.50 usec  
TE 294.1 K  
D1 1.00000000 sec  
MCREST 0.00000000 sec  
MCWRK 0.01500000 sec

===== CHANNEL f1 =====  
NUC1 1H  
P1 6.20 usec  
PL1 0.00 dB  
SFO1 300.1328512 MHz

F2 - Processing parameters  
SI 32768  
SF 300.1300177 MHz  
WDW EM  
SSB 0  
LB 0.10 Hz  
GB 0  
PC 1.00

1D NMR plot parameters  
CX 20.00 cm  
CY 26.89 cm  
F1P 4.905 ppm  
F1 1472.26 Hz  
F2P 3.501 ppm  
F2 1050.62 Hz  
PFMCM 0.07024 ppm/cm  
HZCM 21.08218 Hz/cm

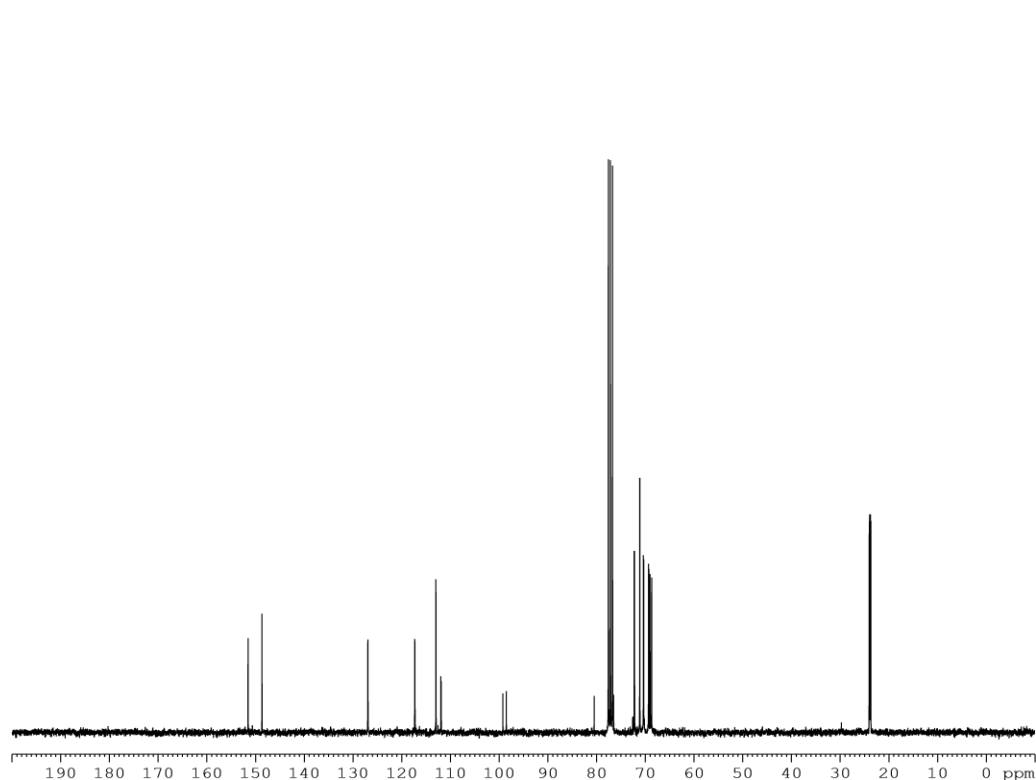

Current Data Parameters  
NAME fc37kj634b  
EXPNO 10  
PROCNO 1

F2 - Acquisition Parameters  
Date\_ 20110916  
Time\_ 6.44  
INSTRUM spect  
PROBHD 5 mm BBI 1H-BB  
PULPROG zgpg30  
TD 65536  
SOLVENT CDCl3  
NS 2000  
DS 4  
SWH 17985.611 Hz  
FIDRES 0.274439 Hz  
AQ 1.8219508 sec  
RG 2048  
DW 27.800 usec  
DE 10.00 usec  
TE 294.2 K  
D1 2.00000000 sec  
d11 0.03000000 sec  
DELTA 1.89999998 sec  
MCREST 0.00000000 sec  
MCWRK 0.01500000 sec

===== CHANNEL f1 =====  
NUC1 13C  
P1 9.00 usec  
PL1 -6.00 dB  
SFO1 75.4752953 MHz

===== CHANNEL f2 =====  
CPDPRG2 waltz16  
NUC2 1H  
PCPD2 80.00 usec  
PL2 0.00 dB  
PL12 22.00 dB  
PL13 22.00 dB  
SFO2 300.1312005 MHz

F2 - Processing parameters  
SI 32768  
SF 75.4677438 MHz  
WDW EM  
SSB 0  
LB 1.00 Hz  
GB 0  
PC 1.40

1D NMR plot parameters  
CX 20.00 cm  
CY 8.75 cm  
F1P 200.000 ppm  
F1 15093.55 Hz  
F2P -10.000 ppm  
F2 -754.68 Hz  
PFMCM 10.50000 ppm/cm  
HZCM 792.41132 Hz/cm

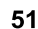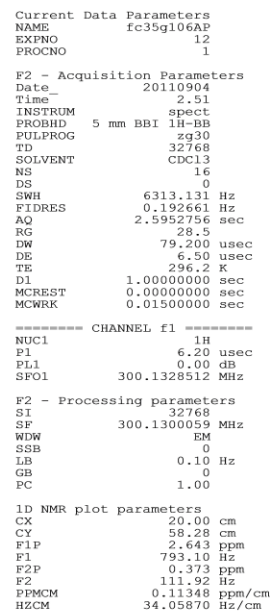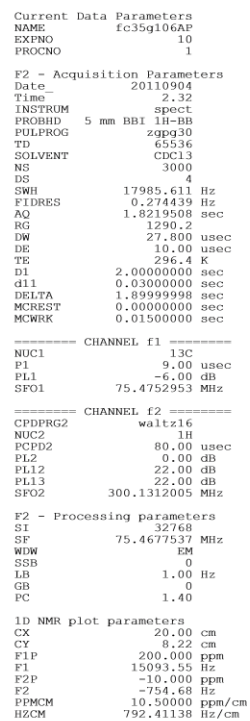

Click-Alkynylation of N- and P- Nucleophiles by Oxidative Cross-Coupling with Alkynylcopper Reagents

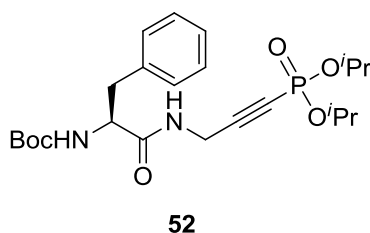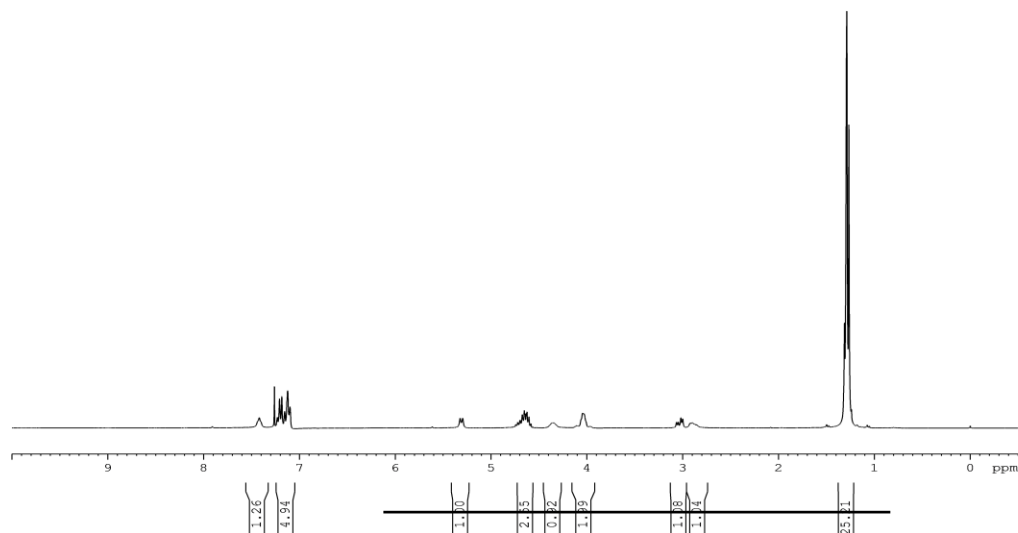

```
Current Data Parameters
NAME      fc37kj634a
EXPNO     12
PROCNO    1

F2 - Acquisition Parameters
Date_     20110916
Time      4.07
INSTRUM   spect
PROBHD    5 mm BBI 1H-BB
PULPROG   zg30
TD         32768
SOLVENT   CDCl3
NS         16
DS         0
SWH        6313.131 Hz
FIDRES     0.192661 Hz
AQ         2.5952756 sec
RG         32
DW         79.200 usec
DE         6.50 usec
TE         294.1 K
D1         1.00000000 sec
MCREST     0.00000000 sec
MCWRK     0.01500000 sec

===== CHANNEL f1 =====
NUC1       1H
P1         6.20 usec
PL1        0.00 dB
SFO1       300.1328512 MHz

F2 - Processing parameters
SI         32768
SF         300.1300053 MHz
WDW        EM
SSB        0
LB         0.10 Hz
GB         0
PC         1.00

1D NMR plot parameters
CX         20.00 cm
CY         11.01 cm
F1P        10.000 ppm
F1         3001.30 Hz
F2P        -0.500 ppm
F2         -150.06 Hz
PPMCM      0.52500 ppm/cm
HZCM       157.56825 Hz/cm
```

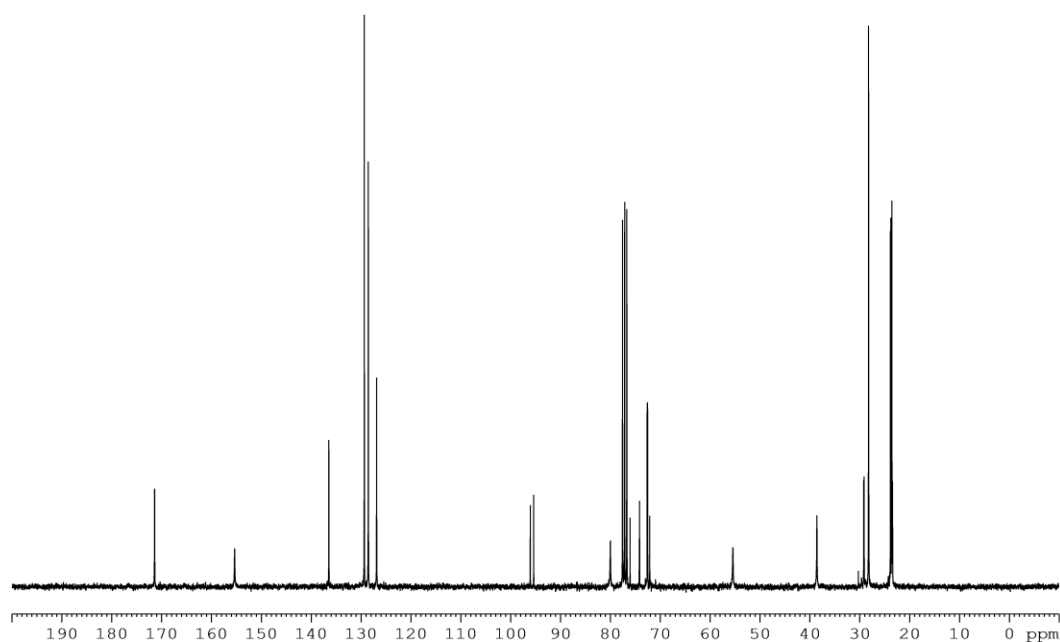

```
Current Data Parameters
NAME      fc39kj634a
EXPNO     10
PROCNO    1

F2 - Acquisition Parameters
Date_     20110928
Time      2.02
INSTRUM   spect
PROBHD    5 mm BBI 1H-BB
PULPROG   zgpg30
TD         65536
SOLVENT   CDCl3
NS         2000
DS         4
SWH        17985.611 Hz
FIDRES     0.274439 Hz
AQ         1.8219508 sec
RG         1824.6
DW         27.800 usec
DE         10.00 usec
TE         295.0 K
D1         2.00000000 sec
d11        0.03000000 sec
DELTA      1.89999998 sec
MCREST     0.00000000 sec
MCWRK     0.01500000 sec

===== CHANNEL f1 =====
NUC1       13C
P1         9.00 usec
PL1        -6.00 dB
SFO1       75.4752953 MHz

===== CHANNEL f2 =====
CPDPRG2   waltz16
NUC2       1H
PCPD2     80.00 usec
PL2        0.00 dB
PL12       22.00 dB
PL13       22.00 dB
SFO2       300.1312005 MHz

F2 - Processing parameters
SI         32768
SF         75.4677490 MHz
WDW        EM
SSB        0
LB         1.00 Hz
GB         0
PC         1.40

1D NMR plot parameters
CX         20.00 cm
CY         9.83 cm
F1P        61.351 ppm
F1         4629.99 Hz
F2P        14.575 ppm
F2         1099.96 Hz
PPMCM      2.33877 ppm/cm
HZCM       176.50180 Hz/cm
```
